# Supplementary material for: Photoredox radical annulation of aroyl sulfoxonium ylides and alkynes for 1-naphthol assembly
Source: Royal Society of Chemistry journal article supplement (doi:10.1039/d6ob00092d), 2026-01-01

# Supporting Information

## Photoredox radical annulation of aroyl sulfoxonium ylides and alkynes for 1-naphthol assembly

Ning Xian,<sup>a</sup> Huawen Huang<sup>\*a</sup> and Feng Zhao<sup>\*b,c</sup>

<sup>a</sup> College of Chemistry, Xiangtan University, Xiangtan 411105, China. Fax: (+86)0731-5829-2251; Tel: (+86)0731-5829-8601; E-mail: hwhuang@xtu.edu.cn.

<sup>b</sup> Hunan Provincial Key Laboratory for Synthetic Biology of Traditional Chinese Medicine, School of Pharmaceutical Sciences, Hunan University of Medicine, Huaihua 418000, China; Email: zhaofenghnmu@163.com

<sup>c</sup> School of Chemistry and Chemical Engineering, Henan Normal University, Xinxiang, 453007, China  
E-mail: hwhuang@xtu.edu.cn

### List of Contents

|                                                                                                    |     |
|----------------------------------------------------------------------------------------------------|-----|
| 1. General information .....                                                                       | S2  |
| 2. General procedure of the reaction products .....                                                | S3  |
| 3. Optimization of reaction conditions .....                                                       | S5  |
| 4. Procedures for the preparation of sulfoxonium ylides .....                                      | S8  |
| 5. Mechanistic studies .....                                                                       | S9  |
| 5.1 Radical trapping experiments .....                                                             | S9  |
| 5.2 Stern-Volmer quenching .....                                                                   | S10 |
| 5.3 Light on/off experiment .....                                                                  | S11 |
| 6. Late-stage derivation and application .....                                                     | S12 |
| 7. Characterization data of all products .....                                                     | S13 |
| 8. References .....                                                                                | S27 |
| 9. Copies of <sup>1</sup> H, <sup>13</sup> C and <sup>19</sup> F NMR spectra of all products ..... | S28 |

## 1. General information

The reactions via general procedure were carried out under an atmosphere of argon unless otherwise noted. Column chromatography was performed using silica gel (200-300 mesh).  $^1\text{H}$ ,  $^{13}\text{C}$  and  $^{19}\text{F}$  NMR spectra were recorded on Bruker-AV (400, 100 and 376 MHz, respectively) instrument internally referenced to tetramethylsilane (TMS) or chloroform signals. Mass spectra were measured on Agilent 5977 GC-MS instrument (EI). High-resolution mass spectra (ESI) were obtained with the Thermo Scientific LTQ Orbitrap XL mass spectrometer. Melting points were measured with a YUHUA X-5 melting point instrument and were uncorrected. The structures of known compounds were further corroborated by comparing their  $^1\text{H}$  NMR,  $^{13}\text{C}$  NMR data and HRMS data with those in literature. A commercially available blue LED (35W, HIPAR30, luminous flux is not less than 3200 lm) was purchased from Shenzhen Jing Feng Times Lighting Technology Co., Ltd as the reaction light source. All irradiation reactions were carried out in borosilicate glass vessel. The distance from the light source to the irradiation vessel is around 4-5 cm. Unless otherwise noted, all photocatalysts and reagents were obtained from commercial suppliers and used without further purification.

## 2. General procedure of the reaction products

**Reaction device diagram:** Reaction set-up for irradiation of mixture with 35 W blue LEDs ( $\lambda_{\text{max}} = 415 \text{ nm}$ ) and a fan was used to maintain the reaction temperature at 25-35 °C.

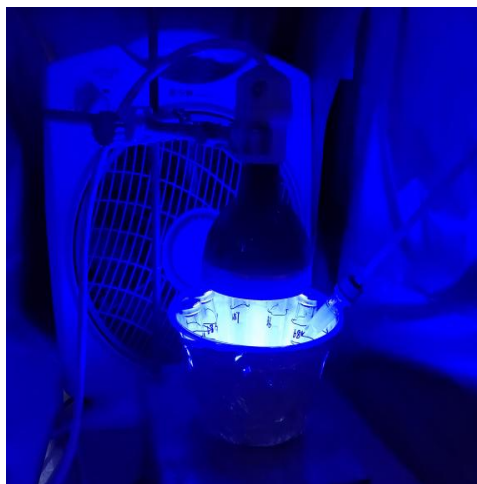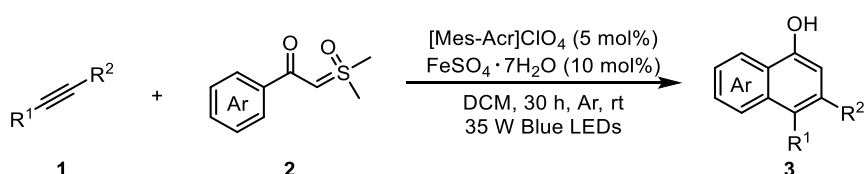

**General Procedure A:** A 10 mL reaction vessel was charged with alkynes **1** (0.24 mmol, 1.2 equiv.), sulfoxonium ylides **2** (0.2 mmol, 1.0 equiv.), FeSO<sub>4</sub>·7H<sub>2</sub>O (5.6 mg, 10 mol%), and [Mes-Acr]ClO<sub>4</sub> (4.1 mg, 5 mol%). The atmosphere was exchanged by applying vacuum and backfilling with Ar (this process was carried out three times). Then, DCM (2.0 mL) was added. The solution was stirred at a distance of 4-5 cm from a 35 W Blue LEDs at room temperature (25-35 °C) for 30 h. After completion of the reaction, the crude mixture was diluted with ethyl acetate, filtered, and concentrated under reduced pressure to remove volatile components. Column chromatography was performed using silica gel (200-300 mesh) to give the pure products **3**.

**General Procedure B:** A 10 mL reaction vessel was charged with alkynes **1** (0.24 mmol, 1.2 equiv.), sulfoxonium ylides **2** (0.2 mmol, 1.0 equiv.), FeSO<sub>4</sub>·7H<sub>2</sub>O (5.6 mg, 10 mol%), and [Mes-Acr]ClO<sub>4</sub> (4.1 mg, 5 mol%). The atmosphere was exchanged by applying vacuum and backfilling with Ar (this process was carried out three times). Then, DCM (2.0 mL) was added. The solution was stirred at a distance of 4-5 cm from a 35 W Blue LEDs at room temperature (25-35 °C) for 48 h. After completion of the reaction, the crude mixture was diluted with ethyl acetate, filtered, and concentrated under reduced pressure to remove volatile components. Column chromatography was performed using silica gel (200-300 mesh) to give the pure products **3**.

### Scaled-up reaction:

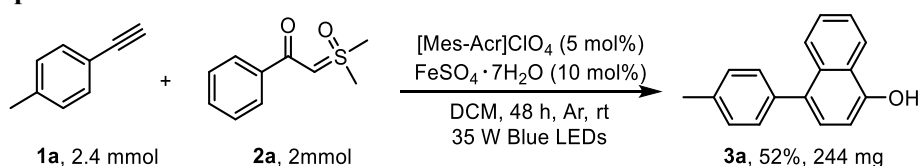

**2 mmol scale reaction:** A 50 mL reaction vessel was charged with alkyne **1a** (299  $\mu$ L, 2.4 mmol, 1.0 equiv.), sulfoxonium ylide **2a** (392 mg, 2 mmol, 1.2 equiv.),  $\text{FeSO}_4 \cdot 7\text{H}_2\text{O}$  (56 mg, 10 mol%), and  $[\text{Mes-Acr}]\text{ClO}_4$  (41 mg, 5 mol%). The atmosphere was exchanged by applying vacuum and backfilling with Ar (this process was carried out three times). Then, DCM (20 mL) was added. The solution was stirred at a distance of 4-5 cm from a 35 W Blue LEDs at room temperature (25-35  $^{\circ}\text{C}$ ) for 48 h. After completion of the reaction, the crude mixture was diluted with ethyl acetate, filtered, and concentrated under reduced pressure to remove volatile components. Column chromatography was performed using silica gel (200-300 mesh) to give the pure product **3a** (52%, 244 mg).

### 3. Optimization of reaction conditions<sup>a</sup>

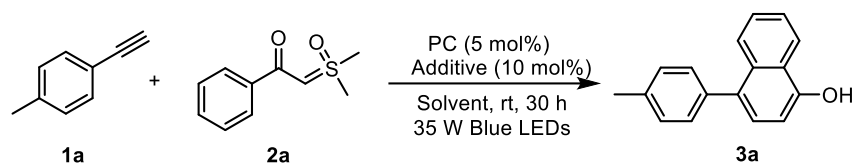

| Entry | PC  | Solvent     | Additive                                                           | Yield (%) <sup>b</sup> |
|-------|-----|-------------|--------------------------------------------------------------------|------------------------|
| 1     | PC1 | DCM         | FeSO <sub>4</sub> ·7H <sub>2</sub> O                               | 59                     |
| 2     | PC2 | DCM         | FeSO <sub>4</sub> ·7H <sub>2</sub> O                               | 53                     |
| 3     | PC3 | DCM         | FeSO <sub>4</sub> ·7H <sub>2</sub> O                               | <10                    |
| 4     | PC4 | DCM         | FeSO <sub>4</sub> ·7H <sub>2</sub> O                               | n.d.                   |
| 5     | PC5 | DCM         | FeSO <sub>4</sub> ·7H <sub>2</sub> O                               | <10                    |
| 6     | PC6 | DCM         | FeSO <sub>4</sub> ·7H <sub>2</sub> O                               | n.d.                   |
| 7     | PC7 | DCM         | FeSO <sub>4</sub> ·7H <sub>2</sub> O                               | trace                  |
| 8     | PC8 | DCM         | FeSO <sub>4</sub> ·7H <sub>2</sub> O                               | trace                  |
| 9     | PC9 | DCM         | FeSO <sub>4</sub> ·7H <sub>2</sub> O                               | trace                  |
| 10    | PC1 | DCE         | FeSO <sub>4</sub> ·7H <sub>2</sub> O                               | 50                     |
| 11    | PC1 | MeCN        | FeSO <sub>4</sub> ·7H <sub>2</sub> O                               | 40                     |
| 12    | PC1 | EA          | FeSO <sub>4</sub> ·7H <sub>2</sub> O                               | 22                     |
| 13    | PC1 | 1,4-Dioxane | FeSO <sub>4</sub> ·7H <sub>2</sub> O                               | 31                     |
| 14    | PC1 | Acetone     | FeSO <sub>4</sub> ·7H <sub>2</sub> O                               | 45                     |
| 15    | PC1 | DMSO        | FeSO <sub>4</sub> ·7H <sub>2</sub> O                               | 17                     |
| 16    | PC1 | THF         | FeSO <sub>4</sub> ·7H <sub>2</sub> O                               | 29                     |
| 17    | PC1 | DCM         | Fe(OAc) <sub>2</sub> ·4H <sub>2</sub> O                            | 54                     |
| 18    | PC1 | DCM         | K <sub>4</sub> [Fe(CN) <sub>6</sub> ]                              | 48                     |
| 19    | PC1 | DCM         | FeSO <sub>4</sub>                                                  | 43                     |
| 20    | PC1 | DCM         | FeCl <sub>3</sub>                                                  | 39                     |
| 21    | PC1 | DCM         | FeF <sub>2</sub>                                                   | 52                     |
| 22    | PC1 | DCM         | Cp <sub>2</sub> Fe                                                 | 31                     |
| 23    | PC1 | DCM         | Fe <sub>2</sub> (SO <sub>4</sub> ) <sub>3</sub> ·xH <sub>2</sub> O | 44                     |
| 24    | PC1 | DCM         | Ni(NO <sub>3</sub> ) <sub>2</sub> ·6H <sub>2</sub> O               | 41                     |
| 25    | PC1 | DCM         | Ni(OAc) <sub>2</sub> ·4H <sub>2</sub> O                            | 35                     |
| 26    | PC1 | DCM         | NiCO <sub>3</sub>                                                  | 50                     |
| 27    | PC1 | DCM         | Bi(OAc) <sub>3</sub>                                               | 41                     |
| 28    | PC1 | DCM         | Co(OAc) <sub>2</sub> ·4H <sub>2</sub> O                            | 53                     |
| 29    | PC1 | DCM         | Cu(OAc) <sub>2</sub> ·H <sub>2</sub> O                             | 30                     |
| 30    | PC1 | DCM         | CuI                                                                | 36                     |

|                 |     |     |                                                     |      |
|-----------------|-----|-----|-----------------------------------------------------|------|
| 31              | PC1 | DCM | Cu(CH <sub>3</sub> CN) <sub>4</sub> BF <sub>4</sub> | 49   |
| 32              | PC1 | DCM | Zn(OAc) <sub>2</sub>                                | 54   |
| 33              | PC1 | DCM | Mn(OAc) <sub>2</sub> ·4H <sub>2</sub> O             | 45   |
| 34              | PC1 | DCM | NH <sub>4</sub> OAc                                 | 18   |
| 35              | PC1 | DCM | CsOAc                                               | n.d. |
| 36              | PC1 | DCM | AgOAc                                               | 39   |
| 37              | PC1 | DCM | AgSbPF <sub>6</sub>                                 | 18   |
| 38              | PC1 | DCM | (PhS) <sub>2</sub>                                  | 51   |
| 39              | PC1 | DCM | LiBr                                                | 32   |
| 40              | PC1 | DCM | 4-MePhSH                                            | <10  |
| 41              | PC1 | DCM | PhSiH <sub>3</sub>                                  | 46   |
| 42              | PC1 | DCM | AlCl <sub>3</sub>                                   | 37   |
| 43 <sup>c</sup> | PC1 | DCM | FeSO <sub>4</sub> ·7H <sub>2</sub> O                | 58   |
| 44 <sup>d</sup> | PC1 | DCM | FeSO <sub>4</sub> ·7H <sub>2</sub> O                | 53   |
| 45 <sup>e</sup> | PC1 | DCM | FeSO <sub>4</sub> ·7H <sub>2</sub> O                | 55   |
| 46 <sup>f</sup> | PC1 | DCM | FeSO <sub>4</sub> ·7H <sub>2</sub> O                | 49   |
| 47 <sup>g</sup> | PC1 | DCM | FeSO <sub>4</sub> ·7H <sub>2</sub> O                | 36   |
| 48 <sup>h</sup> | PC1 | DCM | FeSO <sub>4</sub> ·7H <sub>2</sub> O                | 18   |
| 49              | PC1 | DCM | -                                                   | 46   |
| 50              | -   | DCE | FeSO <sub>4</sub> ·7H <sub>2</sub> O                | n.d. |
| 51 <sup>i</sup> | PC1 | DCE | FeSO <sub>4</sub> ·7H <sub>2</sub> O                | n.d. |

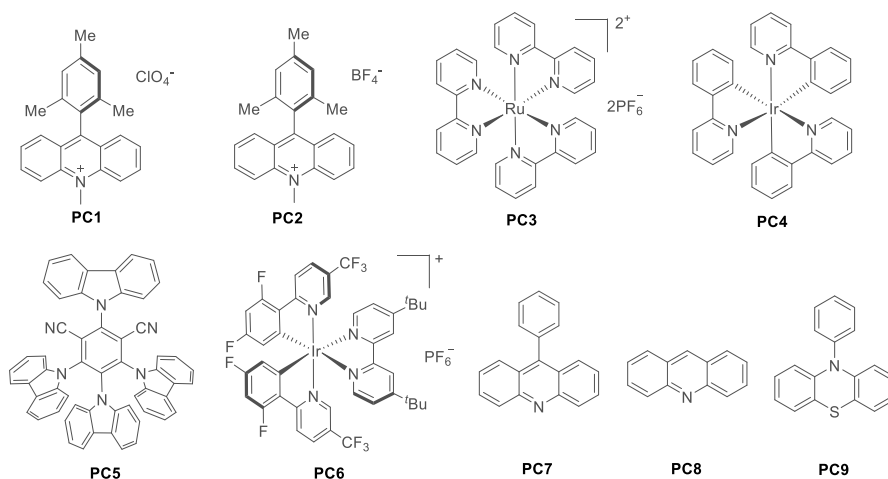

<sup>a</sup> Reaction conditions: **1a** (0.24 mmol), **2a** (0.2 mmol), photocatalyst (PC, 0.01 mmol), additive (10% mol) in solvent (2.0 mL) at 25-35 °C under argon and 35 W blue LEDs irradiation for 30 h. <sup>b</sup> Yields of isolated products. <sup>c</sup> FeSO<sub>4</sub>·7H<sub>2</sub>O (20% mol) was used. <sup>d</sup> FeSO<sub>4</sub>·7H<sub>2</sub>O (5% mol) was used. <sup>e</sup> **1a** :**2a** = 1:1.2. <sup>f</sup> **1a** :**2a** = 1:2. <sup>g</sup> 35W white light was used. <sup>h</sup> 9W purple light was used. <sup>i</sup> Without light.

**Substrates failed or with low reactivity (General Procedure A):**

|                                                                                   |                                                                                   |                                                                                   |                                                                                     |                                                                                     |
|-----------------------------------------------------------------------------------|-----------------------------------------------------------------------------------|-----------------------------------------------------------------------------------|-------------------------------------------------------------------------------------|-------------------------------------------------------------------------------------|
| failed alkynes:                                                                   |                                                                                   |                                                                                   |                                                                                     |                                                                                     |
| 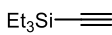 |  |  |   |  |
| n.d.                                                                              | n.d.                                                                              | <10%                                                                              | n.d.                                                                                | <10%                                                                                |
| failed ylides:                                                                    |                                                                                   |                                                                                   |                                                                                     |                                                                                     |
|  |  |  |  |                                                                                     |
| complex                                                                           | <10%                                                                              | <10%                                                                              | <10%                                                                                |                                                                                     |

#### 4. Procedures for the preparation of sulfoxonium ylides

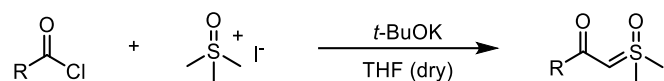

To a stirred solution of potassium tert-butoxide (3.0 g, 27.2 mmol) in anhydrous THF (30 mL) was added trimethylsulfoxonium iodide (5.0 g, 20.6 mmol) at rt. The resulting mixture is refluxed for 2 h. The reaction mixture is then cooled to 0 °C, followed by addition of acyl chlorides (7 mmol) in THF (7 mL). The reaction was allowed to rt and stirred for 3 h. Next, the solvent was evaporated and water (15 mL) and dichloromethane (20 mL) were added to the resulting slurry. The layers were separated and the aqueous layer was washed with dichloromethane (3×50 mL) and the organic layers were combined. The organic solution was dried over anhydrous sodium sulphate (Na<sub>2</sub>SO<sub>4</sub>), filtered over a sintered funnel and evaporated to dryness. The crude product was purified by flash chromatography over silica gel using DCM/MeOH (95:5) to afford the corresponding sulfoxonium ylides.<sup>[1]</sup>



## 5. Mechanistic studies

### 5.1 Radical trapping experiments

(a) The following reaction was carried out under standard conditions. A 10 mL reaction vessel was charged with *p*-methylphenylethyne **1a** (29.9  $\mu$ L, 0.24 mmol, 1.2 equiv.), sulfoxonium ylide **2a** (39.2 mg, 0.2 mmol, 1.0 equiv.), FeSO<sub>4</sub>·7H<sub>2</sub>O (5.6 mg, 10 mol%), 2,2,6,6-tetramethylpiperidin-1-oxyl (TEMPO) (94 mg, 0.6 mmol), and [Mes-Acr]ClO<sub>4</sub> (4.1 mg, 5 mol%). The atmosphere was exchanged by applying vacuum and backfilling with Ar (this process was carried out three times). Then, DCM (2 mL) was added. The solution was stirred at a distance of 4-5 cm from a 35 W Blue LEDs at room temperature (25-35 °C) for 30 h. After completion of the reaction, the crude mixture was diluted with ethyl acetate, filtered, and concentrated under reduced pressure to remove volatile components. The crude residues were analyzed by GC-MS. The product **3a** was completely suppressed.

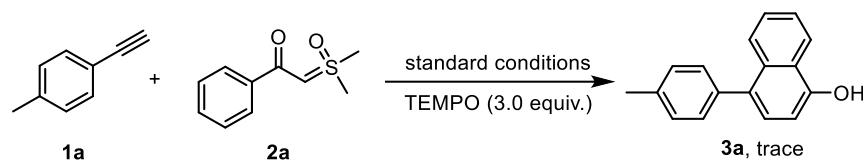

(b) The following reaction was carried out under standard conditions: A 10 mL reaction vessel was charged with *p*-methylphenylethyne **1a** (29.9  $\mu$ L, 0.24 mmol, 1.2 equiv.), sulfoxonium ylide **2a** (39.2 mg, 0.2 mmol, 1.0 equiv.), FeSO<sub>4</sub>·7H<sub>2</sub>O (5.6 mg, 10 mol%), butylatedhydroxytoluene (BHT) (132 mg, 0.6 mmol), and [Mes-Acr]ClO<sub>4</sub> (4.1 mg, 5 mol%). The atmosphere was exchanged by applying vacuum and backfilling with Ar (this process was carried out three times). Then, DCM (2 mL) was added. The solution was stirred at a distance of 4-5 cm from a 35 W Blue LEDs at room temperature (25-35 °C) for 30 h. After completion of the reaction, the crude mixture was diluted with ethyl acetate, filtered, and concentrated under reduced pressure to remove volatile components. The crude residues were analyzed by GC-MS and HRMS. BHT-trapped product **5a** was detected by HRMS and the formation of product **3a** was reduced to 16%.

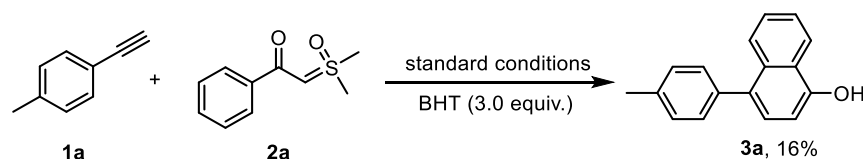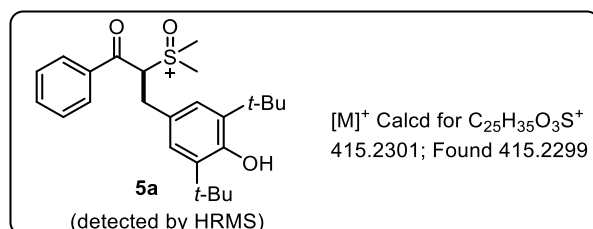



successively added and uniformly stirred, and the resulting mixture was bubbled with argon for 2 minutes and irradiated at 430 nm. Fluorescence emission spectra of 0  $\mu\text{L}$ , 20.0  $\mu\text{L}$ , 40.0  $\mu\text{L}$ , 60.0  $\mu\text{L}$ , 80.0  $\mu\text{L}$ , 100.0  $\mu\text{L}$  fluorescence intensity. Follow this method and make changes to the amount to obtain the Stern-Volmer relationship in turn. The results were shown in the following figures.

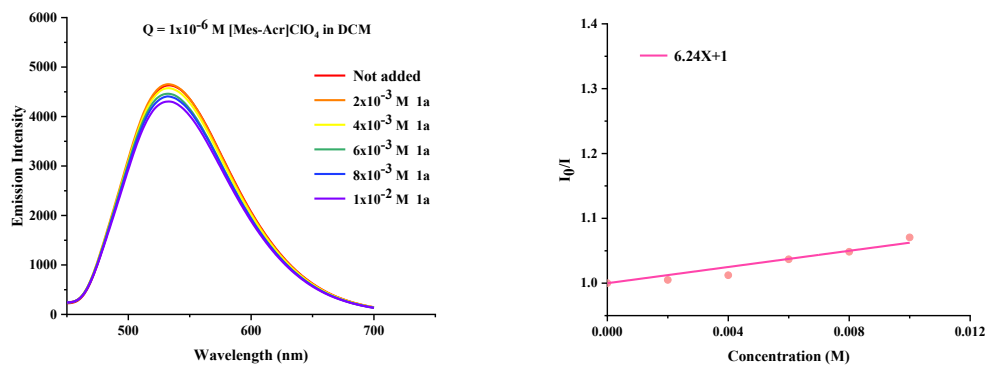

Emission quenching of  $[\text{Mes-Acr}]\text{ClO}_4$  with  $p$ -methylphenylethyne (**1a**) in DCM

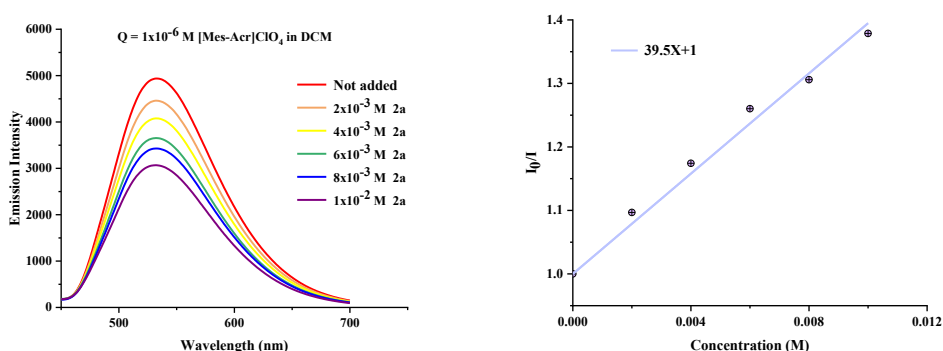

Emission quenching of  $[\text{Mes-Acr}]\text{ClO}_4$  with acetophenone sulfoxonium ylide (**2a**) in DCM

### 5.3 Light on/off experiment

Conducted the relationship of products with light on-off under standard conditions. Subsequent samples (each 20  $\mu\text{L}$ ) taken at regular time intervals and determined by GC with dodecane as the internal standard.

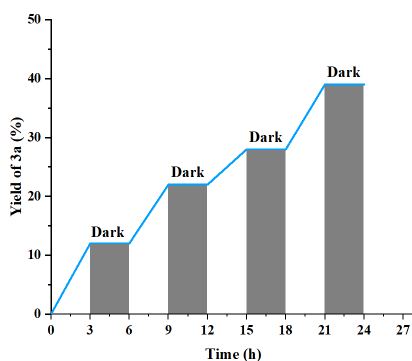

Plot of light on-off experiment

## 6. Late-stage derivation and application

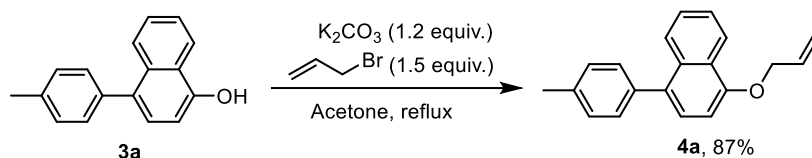

An oven-dried 10 mL reaction tube was equipped with naphthol **3a** (0.2 mmol, 46.8 mg) and  $K_2CO_3$  (0.24 mmol, 1.2 equiv.) in acetone (2 mL) at room temperature. Allyl bromide (0.3 mmol, 1.5 equiv.) was added dropwise over 20 min, then it was heated to reflux for 7 h, after which time TLC showed that the reaction was complete.<sup>[2]</sup> The reaction was quenched with water (5 mL), and the aqueous phase was extracted with EtOAc (3 x 10 mL). The combined organic layers were dried over anhydrous  $Na_2SO_4$ , filtered, and concentrated under reduced pressure. The crude product was purified by flash column chromatography (petroleum ether/ethyl acetate = 100:1) to afford product **4a** (47.8 mg, 87% yield) a yellow solid (mp: 89-91 °C).

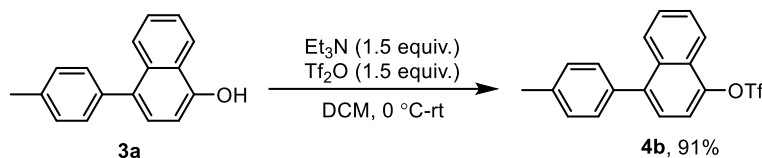

Naphthol **3a** (46.8 mg, 0.2 mmol) was dissolved in DCM (1.0 mL) and then cooled to 0 °C. Triethylamine (TEA, 0.3 mmol) was added, followed by addition of trifluoromethanesulfonic anhydride ( $Tf_2O$ , 0.3 mmol) within 5 minutes via a syringe. The mixture was gradually warmed to room temperature and stirred for 2 h until **3a** was completely consumed, as monitored by TLC.<sup>[3]</sup> The solvent was then removed under reduced pressure. The crude product was purified by flash column chromatography (petroleum ether/ethyl acetate = 100:1) to afford the alcohol product **4b** (66.6 mg, 91% yield) as a yellow solid (mp: 127-129 °C).

## 7. Characterization data of all products

### 4-(*p*-tolyl)naphthalen-1-ol (**3a**)<sup>[4]</sup>

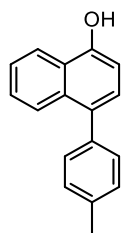

Following General Procedure A, product **3a** (27.6 mg, 59%) as a gray solid was obtained after flash chromatography (petroleum ether/ethyl acetate = 15:1).

<sup>1</sup>H NMR (400 MHz, CDCl<sub>3</sub>) δ 8.23 (d, *J* = 8.2 Hz, 1H), 7.89 (d, *J* = 8.3 Hz, 1H), 7.52 – 7.10 (m, 7H), 6.75 (d, *J* = 7.7 Hz, 1H), 5.51 (s, 1H), 2.41 (s, 3H).

<sup>13</sup>C NMR (100 MHz, CDCl<sub>3</sub>) δ 150.6, 137.7, 136.5, 133.2, 132.7, 130.1, 128.9, 126.7, 126.4, 126.0, 125.1, 124.4, 121.7, 108.3, 21.2.

### 4-(4-propylphenyl)naphthalen-1-ol (**3b**)

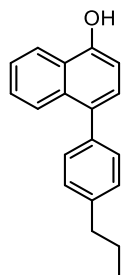

Following General Procedure A, product **3b** (26.2 mg, 50%) as a gray solid (mp: 74-76 °C) was obtained after flash chromatography (petroleum ether/ethyl acetate = 20:1).

<sup>1</sup>H NMR (400 MHz, CDCl<sub>3</sub>) δ 8.25 (d, *J* = 8.1 Hz, 1H), 7.91 (d, *J* = 8.3 Hz, 1H), 7.53 – 7.39 (m, 2H), 7.37 (d, *J* = 7.9 Hz, 2H), 7.30 – 7.19 (m, 3H), 6.83 (d, *J* = 7.7 Hz, 1H), 5.51 (s, 1H), 2.67 (t, *J* = 7.7 Hz, 2H), 1.79 – 1.65 (m, 2H), 1.01 (t, *J* = 7.3 Hz, 3H).

<sup>13</sup>C NMR (100 MHz, CDCl<sub>3</sub>) δ 150.7, 141.3, 138.0, 133.2, 132.7, 130.0, 128.3, 126.7, 126.4, 126.1, 125.1, 124.4, 121.8, 108.2, 37.8, 24.6, 14.0.

HRMS (ESI) *m/z*: [M-H]<sup>-</sup> Calcd for C<sub>19</sub>H<sub>17</sub>O<sup>-</sup> 261.1285; Found 261.1304.

### 4-(4-fluorophenyl)naphthalen-1-ol (**3c**)<sup>[4]</sup>

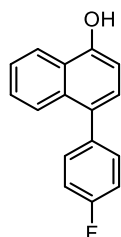

Following General Procedure A, product **3c** (26.7 mg, 56%) as a gray solid was obtained after flash chromatography (petroleum ether/ethyl acetate = 20:1).

$^1\text{H}$  NMR (400 MHz,  $\text{CDCl}_3$ )  $\delta$  8.27 (d,  $J = 8.8$  Hz, 1H), 7.81 (d,  $J = 8.3$  Hz, 1H), 7.56 – 7.37 (m, 4H), 7.27 – 7.12 (m, 3H), 6.85 (d,  $J = 7.7$  Hz, 1H), 5.49 (s, 1H).

$^{13}\text{C}$  NMR (100 MHz,  $\text{CDCl}_3$ )  $\delta$  162.0 (d,  $J = 245.5$  Hz), 151.0, 136.6 (d,  $J = 3.3$  Hz), 132.7, 132.1, 131.7 (d,  $J = 8.0$  Hz), 126.9, 126.7, 125.7, 125.2, 124.4, 121.9, 115.1 (d,  $J = 21.3$  Hz), 108.1.

$^{19}\text{F}$  NMR (376 MHz,  $\text{CDCl}_3$ )  $\delta$  -115.9.

#### 4-(4-chlorophenyl)naphthalen-1-ol (**3d**)<sup>[4]</sup>

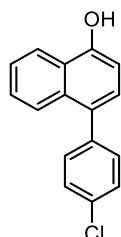

Following General Procedure A, product **3d** (26.9 mg, 53%) as a gray solid was obtained after flash chromatography (petroleum ether/ethyl acetate = 15:1).

$^1\text{H}$  NMR (400 MHz,  $\text{CDCl}_3$ )  $\delta$  8.26 (d,  $J = 8.3$  Hz, 1H), 7.80 (d,  $J = 8.4$  Hz, 1H), 7.54 – 7.34 (m, 6H), 7.20 (d,  $J = 7.6$  Hz, 1H), 6.84 (d,  $J = 7.7$  Hz, 1H), 5.50 (s, 1H).

$^{13}\text{C}$  NMR (100 MHz,  $\text{CDCl}_3$ )  $\delta$  151.2, 139.2, 132.9, 132.5, 131.8, 131.5, 128.4, 126.9, 126.8, 125.6, 125.3, 124.4, 121.9, 108.1.

#### methyl 4-(4-hydroxynaphthalen-1-yl)benzoate (**3e**)<sup>[4]</sup>

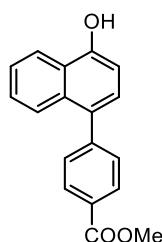

Following General Procedure A, product **3e** (24.5 mg, 44%) as a gray solid was obtained after flash chromatography (petroleum ether/ethyl acetate = 8:1).

$^1\text{H}$  NMR (400 MHz,  $\text{CDCl}_3$ )  $\delta$  8.32 (d,  $J = 8.3$  Hz, 1H), 8.15 (d,  $J = 8.0$  Hz, 2H), 7.83 (d,  $J = 8.4$  Hz, 1H), 7.59 – 7.41 (m, 4H), 7.25 (d,  $J = 7.5$  Hz, 1H), 6.92 (d,  $J = 7.7$  Hz, 1H), 6.43 (s, 1H), 3.99 (s, 3H).

$^{13}\text{C}$  NMR (100 MHz,  $\text{CDCl}_3$ )  $\delta$  167.5, 151.8, 145.9, 132.3, 131.7, 130.3, 129.6, 128.4, 127.1, 126.8, 125.4, 125.3, 124.5, 122.1, 108.1, 52.3.

#### 4-(4-(trifluoromethyl)phenyl)naphthalen-1-ol (**3f**)<sup>[4]</sup>

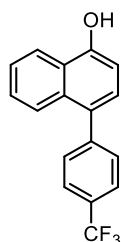

Following General Procedure A, product **3f** (27.7 mg, 48%) as a gray solid was obtained after flash chromatography (petroleum ether/ethyl acetate = 10:1).

$^1\text{H}$  NMR (400 MHz,  $\text{CDCl}_3$ )  $\delta$  8.29 (d,  $J$  = 8.3 Hz, 1H), 7.80 (d,  $J$  = 8.4 Hz, 1H), 7.72 (d,  $J$  = 7.9 Hz, 2H), 7.60 – 7.43 (m, 4H), 7.24 (d,  $J$  = 7.7 Hz, 1H), 6.87 (d,  $J$  = 7.7 Hz, 1H), 5.49 (s, 1H).

$^{13}\text{C}$  NMR (100 MHz,  $\text{CDCl}_3$ )  $\delta$  151.5, 144.5, 132.3, 131.6, 130.5, 129.2, 128.9, 127.05, 127.96, 125.4, 125.2 (q,  $J$  = 3.7 Hz), 124.45, 124.36 (q,  $J$  = 272.0 Hz), 122.0, 108.1.

$^{19}\text{F}$  NMR (376 MHz,  $\text{CDCl}_3$ )  $\delta$  -62.3.

#### 4-phenylnaphthalen-1-ol (**3g**) <sup>[4]</sup>

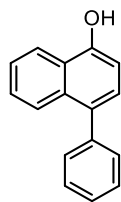

Following General Procedure A, product **3g** (22.5 mg, 51%) as a gray solid was obtained after flash chromatography (petroleum ether/ethyl acetate = 20:1).

$^1\text{H}$  NMR (400 MHz,  $\text{CDCl}_3$ )  $\delta$  8.26 (d,  $J$  = 8.3 Hz, 1H), 7.88 (d,  $J$  = 8.4 Hz, 1H), 7.52 – 7.38 (m, 7H), 7.25 (d,  $J$  = 7.8 Hz, 1H), 6.86 (d,  $J$  = 7.7 Hz, 1H), 5.52 (s, 1H).

$^{13}\text{C}$  NMR (100 MHz,  $\text{CDCl}_3$ )  $\delta$  150.9, 140.7, 133.2, 132.6, 130.2, 128.2, 126.9, 126.8, 126.5, 125.9, 125.1, 124.4, 121.8, 108.1.

#### 4-(*m*-tolyl)naphthalen-1-ol (**3h**) <sup>[4]</sup>

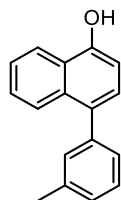

Following General Procedure A, product **3h** (24.4 mg, 52%) as a gray solid was obtained after flash chromatography (petroleum ether/ethyl acetate = 20:1).

$^1\text{H}$  NMR (400 MHz,  $\text{CDCl}_3$ )  $\delta$  8.26 (d,  $J$  = 8.3 Hz, 1H), 7.89 (d,  $J$  = 8.4 Hz, 1H), 7.53 – 7.42 (m, 2H), 7.36 (t,  $J$  = 7.4 Hz, 1H), 7.29 – 7.20 (m, 4H), 6.85 (d,  $J$  = 7.7 Hz, 1H), 5.44 (s, 1H), 2.43 (s, 3H).

$^{13}\text{C}$  NMR (100 MHz,  $\text{CDCl}_3$ )  $\delta$  150.8, 140.7, 137.8, 133.3, 132.7, 131.0, 128.1, 127.6, 127.3, 126.7, 126.5, 126.0, 125.1, 124.4, 121.8, 108.1, 21.5.

#### 4-(3-chlorophenyl)naphthalen-1-ol (**3i**)

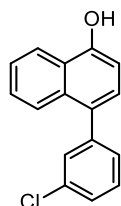

Following General Procedure A, product **3i** (27.4 mg, 54%) as a gray solid (mp: 89-91 °C) was obtained after flash chromatography (petroleum ether/ethyl acetate = 20:1).

<sup>1</sup>H NMR (400 MHz, CDCl<sub>3</sub>) δ 8.27 (d, *J* = 8.2 Hz, 1H), 7.82 (d, *J* = 8.5 Hz, 1H), 7.55 – 7.43 (m, 3H), 7.41 – 7.30 (m, 3H), 7.22 (d, *J* = 7.7 Hz, 1H), 6.85 (d, *J* = 7.7 Hz, 1H), 5.56 (s, 1H).

<sup>13</sup>C NMR (100 MHz, CDCl<sub>3</sub>) δ 151.3, 142.6, 134.0, 132.4, 131.6, 130.2, 129.4, 128.4, 127.0, 126.9, 126.8, 125.5, 125.3, 124.4, 122.0, 108.0.

HRMS (ESI) *m/z*: [M-H]<sup>-</sup> Calcd for C<sub>16</sub>H<sub>10</sub>ClO<sup>-</sup> 253.0426; Found 253.0420.

#### 4-(2-chlorophenyl)naphthalen-1-ol (**3j**)

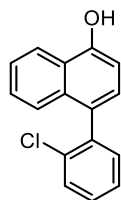

Following General Procedure A, product **3j** (29.5 mg, 58%) as a gray solid (mp: 110-112 °C) was obtained after flash chromatography (petroleum ether/ethyl acetate = 15:1).

<sup>1</sup>H NMR (400 MHz, CDCl<sub>3</sub>) δ 8.26 (d, *J* = 8.4 Hz, 1H), 7.56 – 7.47 (m, 2H), 7.47 – 7.41 (m, 2H), 7.39 – 7.31 (m, 3H), 7.20 (d, *J* = 7.6 Hz, 1H), 6.86 (d, *J* = 7.6 Hz, 1H), 5.52 (s, 1H).

<sup>13</sup>C NMR (100 MHz, CDCl<sub>3</sub>) δ 151.4, 139.2, 134.4, 132.7, 132.5, 130.2, 129.5, 128.8, 127.1, 126.7, 126.6, 125.8, 125.2, 124.2, 121.9.

HRMS (ESI) *m/z*: [M+K]<sup>+</sup> Calcd for C<sub>16</sub>H<sub>11</sub>ClKO<sup>+</sup> 293.0130; Found 293.0148.

#### 4-(2-bromophenyl)naphthalen-1-ol (**3k**)

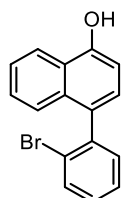

Following General Procedure A, product **3k** (29.3 mg, 49%) as a gray solid (mp: 101-103 °C) was obtained after flash chromatography (petroleum ether/ethyl acetate = 15:1).

<sup>1</sup>H NMR (400 MHz, CDCl<sub>3</sub>) δ 8.27 (d, *J* = 8.3 Hz, 1H), 7.72 (d, *J* = 7.8 Hz, 1H), 7.53 – 7.47 (m, 1H), 7.44 – 7.31 (m, 4H), 7.30 – 7.23 (m, 1H), 7.18 (d, *J* = 7.6 Hz, 1H), 6.86 (d, *J* = 7.7 Hz, 1H), 5.72 (s, 1H).

<sup>13</sup>C NMR (100 MHz, CDCl<sub>3</sub>) δ 151.4, 141.2, 132.6, 132.4, 131.9, 128.9, 127.1, 127.0, 126.6, 125.9, 125.2, 124.9, 124.2, 121.9, 107.9.

HRMS (ESI) *m/z*: [M-H]<sup>-</sup> Calcd for C<sub>16</sub>H<sub>10</sub>BrO<sup>-</sup> 296.9921; Found 296.9911.

#### 4-(3,5-dimethoxyphenyl)naphthalen-1-ol (**3l**)<sup>[4]</sup>



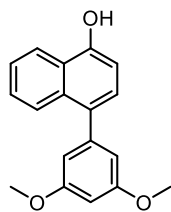

Following General Procedure A, product **3l** (31.4 mg, 56%) as a gray liquid was obtained after flash chromatography (petroleum ether/ethyl acetate = 8:1).

$^1\text{H}$  NMR (400 MHz,  $\text{CDCl}_3$ )  $\delta$  8.26 (d,  $J$  = 8.2 Hz, 1H), 7.93 (d,  $J$  = 8.6 Hz, 1H), 7.54 – 7.40 (m, 2H), 7.26 (d,  $J$  = 7.6 Hz, 1H), 6.84 (d,  $J$  = 7.7 Hz, 1H), 6.63 (d,  $J$  = 2.3 Hz, 2H), 6.53 (t,  $J$  = 2.3 Hz, 1H), 5.72 (s, 1H), 3.83 (s, 6H).

$^{13}\text{C}$  NMR (100 MHz,  $\text{CDCl}_3$ )  $\delta$  160.4, 151.1, 142.8, 132.9, 132.5, 126.6, 126.5, 125.9, 125.1, 124.4, 121.8, 108.4, 107.9, 99.1, 55.4.

#### [1,1'-binaphthalen]-4-ol (**3m**)<sup>[4]</sup>

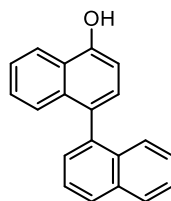

Following General Procedure A, product **3m** (20.0 mg, 37%) as a gray solid was obtained after flash chromatography (petroleum ether/ethyl acetate = 10:1).

$^1\text{H}$  NMR (400 MHz,  $\text{DMSO}-d_6$ )  $\delta$  10.40 (s, 1H), 8.27 (d,  $J$  = 8.3 Hz, 1H), 8.00 (d,  $J$  = 8.0 Hz, 2H), 7.62 (dd,  $J$  = 8.3, 6.9 Hz, 1H), 7.52 – 7.40 (m, 3H), 7.35 – 7.24 (m, 4H), 7.12 (d,  $J$  = 8.4 Hz, 1H), 7.03 (d,  $J$  = 7.7 Hz, 1H).

$^{13}\text{C}$  NMR (100 MHz,  $\text{DMSO}-d_6$ )  $\delta$  153.6, 138.8, 133.8, 133.7, 133.1, 128.8, 128.7, 128.6, 128.5, 128.1, 126.9, 126.6, 126.5, 126.4, 126.2, 126.1, 125.1, 125.0, 122.9, 108.2.

#### 4-propylnaphthalen-1-ol (**3n**)<sup>[4]</sup>

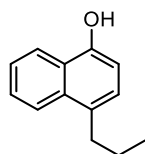

Following General Procedure A, product **3n** (19.1 mg, 51%) as a brown liquid was obtained after flash chromatography (petroleum ether/ethyl acetate = 20:1).

$^1\text{H}$  NMR (400 MHz,  $\text{CDCl}_3$ )  $\delta$  8.21 (d,  $J$  = 8.7 Hz, 1H), 7.98 (d,  $J$  = 8.4 Hz, 1H), 7.54 – 7.42 (m, 2H), 7.10 (d,  $J$  = 7.6 Hz, 1H), 6.70 (d,  $J$  = 7.6 Hz, 1H), 5.69 (s, 1H), 2.98 – 2.89 (m, 2H), 1.79 – 1.65 (m, 2H), 0.99 (t,  $J$  = 7.3 Hz, 3H).

$^{13}\text{C}$  NMR (100 MHz,  $\text{CDCl}_3$ )  $\delta$  149.8, 132.8, 131.1, 126.1, 125.6, 124.73, 124.69, 123.9, 122.2, 108.1, 34.7, 24.0, 14.2.

#### 4-hexylnaphthalen-1-ol (**3o**)

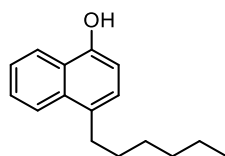

Following General Procedure A, product **3o** (39.1 mg, 70%) as a brown liquid was obtained after flash chromatography (petroleum ether/ethyl acetate = 20:1).

$^1\text{H}$  NMR (400 MHz,  $\text{CDCl}_3$ )  $\delta$  8.21 (d,  $J$  = 8.1 Hz, 1H), 7.98 (d,  $J$  = 8.3 Hz, 1H), 7.55 – 7.44 (m, 2H), 7.11 (d,  $J$  = 7.6 Hz, 1H), 6.70 (d,  $J$  = 7.6 Hz, 1H), 5.52 (s, 1H), 2.96 (t,  $J$  = 7.8 Hz, 2H), 1.69 (p,  $J$  = 7.7 Hz, 2H), 1.46 – 1.36 (m, 2H), 1.35 – 1.28 (m, 4H), 0.89 (t,  $J$  = 6.8 Hz, 3H).

$^{13}\text{C}$  NMR (100 MHz,  $\text{CDCl}_3$ )  $\delta$  149.7, 132.8, 131.5, 126.1, 125.4, 124.7, 123.9, 122.2, 108.1, 32.6, 31.8, 30.9, 29.4, 22.7, 14.1.

HRMS (ESI)  $m/z$ :  $[\text{M-H}]^-$  Calcd for  $\text{C}_{16}\text{H}_{19}\text{O}^-$  227.1441; Found 227.1438.

#### 4-nonylnaphthalen-1-ol (**3p**)

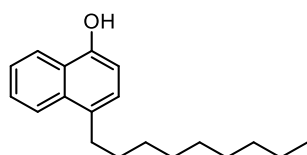

Following General Procedure A, product **3p** (32.4 mg, 60%) as a gray solid (mp: 65-67 °C) was obtained after flash chromatography (petroleum ether/ethyl acetate = 15:1).

$^1\text{H}$  NMR (400 MHz,  $\text{CDCl}_3$ )  $\delta$  8.27 (d,  $J$  = 8.2 Hz, 1H), 8.04 (d,  $J$  = 8.3 Hz, 1H), 7.54 (dt,  $J$  = 18.5, 7.0 Hz, 2H), 7.16 (d,  $J$  = 7.6 Hz, 1H), 6.75 (d,  $J$  = 7.6 Hz, 1H), 5.56 (s, 1H), 3.01 (t,  $J$  = 7.8 Hz, 2H), 1.74 (p,  $J$  = 7.5 Hz, 2H), 1.50 – 1.30 (m, 12H), 0.93 (t,  $J$  = 6.6 Hz, 3H).

$^{13}\text{C}$  NMR (100 MHz,  $\text{CDCl}_3$ )  $\delta$  149.7, 132.8, 131.5, 126.1, 125.4, 124.7, 124.0, 122.2, 108.2, 32.7, 31.9, 31.0, 29.8, 29.61, 29.56, 29.3, 22.7, 14.1.

HRMS (ESI)  $m/z$ :  $[\text{M-H}]^-$  Calcd for  $\text{C}_{19}\text{H}_{25}\text{O}^-$  269.1911; Found 269.1905.

#### 3,4-diphenylnaphthalen-1-ol (**3q**)<sup>[4]</sup>

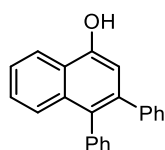

Following General Procedure B, product **3q** (18.3 mg, 31%) as a brown solid was obtained after flash chromatography (petroleum ether/ethyl acetate = 10:1).

$^1\text{H}$  NMR (400 MHz,  $\text{CDCl}_3$ )  $\delta$  8.27 (dd,  $J$  = 8.4, 1.4 Hz, 1H), 7.63 (d,  $J$  = 8.5 Hz, 1H), 7.52 – 7.46 (m, 1H), 7.44 – 7.38 (m, 1H), 7.29 – 7.22 (m, 3H), 7.18 – 7.09 (m, 7H), 6.90 (s, 1H), 5.62 (s, 1H).

$^{13}\text{C}$  NMR (100 MHz,  $\text{CDCl}_3$ )  $\delta$  150.6, 141.8, 139.0, 138.4, 133.9, 131.9, 130.7, 130.0, 127.7, 127.6, 126.7, 126.5, 126.2, 125.0, 123.6, 121.5, 110.9.

#### 3-methyl-4-phenylnaphthalen-1-ol (**3r**)

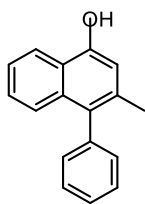

Following General Procedure A, product **3r** (19.7 mg, 42%) as a yellow liquid was obtained after flash chromatography (petroleum ether/ethyl acetate = 15:1).

$^1\text{H}$  NMR (400 MHz,  $\text{CDCl}_3$ )  $\delta$  8.19 (d,  $J = 8.3$  Hz, 1H), 7.52 – 7.34 (m, 6H), 7.29 – 7.24 (m, 2H), 6.78 (s, 1H), 5.42 (s, 1H), 2.18 (s, 3H).

$^{13}\text{C}$  NMR (100 MHz,  $\text{CDCl}_3$ )  $\delta$  150.4, 139.7, 134.1, 133.4, 131.2, 130.7, 128.3, 126.8, 126.3, 126.1, 124.1, 122.7, 121.3, 111.1, 20.8.

HRMS (ESI)  $m/z$ :  $[\text{M-H}]^-$  Calcd for  $\text{C}_{17}\text{H}_{13}\text{O}^-$  233.0972; Found 233.0965.

#### 6-methyl-4-(*p*-tolyl)naphthalen-1-ol (**3t**)

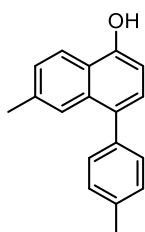

Following General Procedure A, product **3t** (30.0 mg, 60%) as a gray solid (mp: 56-58 °C) was obtained after flash chromatography (petroleum ether/ethyl acetate = 15:1).

$^1\text{H}$  NMR (400 MHz,  $\text{CDCl}_3$ )  $\delta$  8.14 (d,  $J = 8.6$  Hz, 1H), 7.65 (s, 1H), 7.39 – 7.25 (m, 5H), 7.18 (d,  $J = 7.7$  Hz, 1H), 6.76 (d,  $J = 7.7$  Hz, 1H), 5.36 (s, 1H), 2.43 (d,  $J = 9.6$  Hz, 6H).

$^{13}\text{C}$  NMR (100 MHz,  $\text{CDCl}_3$ )  $\delta$  150.8, 138.0, 136.4, 136.2, 132.9, 132.5, 130.1, 128.9, 127.3, 126.9, 124.9, 122.6, 121.7, 107.4, 21.9, 21.2.

HRMS (ESI)  $m/z$ :  $[\text{M-H}]^-$  Calcd for  $\text{C}_{18}\text{H}_{15}\text{O}^-$  247.1128; Found 247.1120.

#### 6-methoxy-4-(*p*-tolyl)naphthalen-1-ol (**3u**)

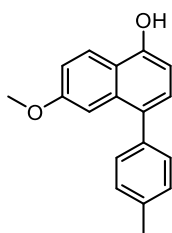

Following General Procedure A, product **3u** (26.5 mg, 59%) as a gray liquid was obtained after flash chromatography (petroleum ether/ethyl acetate = 12:1).

$^1\text{H}$  NMR (400 MHz,  $\text{CDCl}_3$ )  $\delta$  8.18 (d,  $J = 9.1$  Hz, 1H), 7.37 (d,  $J = 8.0$  Hz, 2H), 7.30 – 7.23 (m, 3H), 7.22 – 7.13 (m, 2H), 6.71 (d,  $J = 7.7$  Hz, 1H), 5.45 (s, 1H), 3.77 (s, 3H), 2.44 (s, 3H).

$^{13}\text{C}$  NMR (100 MHz,  $\text{CDCl}_3$ )  $\delta$  158.1, 151.0, 138.1, 136.4, 134.2, 132.0, 129.9, 129.0, 127.6, 123.7, 119.7, 117.2, 106.3, 104.8, 55.2, 21.2.

HRMS (ESI)  $m/z$ :  $[M+H]^+$  Calcd for  $C_{18}H_{17}O_2^+$  265.1223; Found 265.1226.

**6-(tert-butyl)-4-(*p*-tolyl)naphthalen-1-ol (3v)**

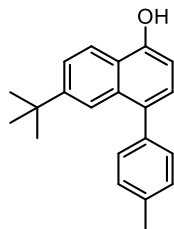

Following General Procedure A, product **3v** (36.6 mg, 63%) as a gray liquid was obtained after flash chromatography (petroleum ether/ethyl acetate = 18:1).

$^1H$  NMR (400 MHz,  $CDCl_3$ )  $\delta$  8.18 (d,  $J$  = 8.8 Hz, 1H), 7.91 (d,  $J$  = 2.0 Hz, 1H), 7.59 (dd,  $J$  = 8.8, 2.0 Hz, 1H), 7.38 (d,  $J$  = 8.1 Hz, 2H), 7.28 (d,  $J$  = 7.9 Hz, 2H), 7.20 (d,  $J$  = 7.7 Hz, 1H), 6.78 (d,  $J$  = 7.7 Hz, 1H), 5.41 (s, 1H), 2.44 (s, 3H), 1.32 (s, 9H).

$^{13}C$  NMR (100 MHz,  $CDCl_3$ )  $\delta$  150.6, 149.1, 138.0, 136.3, 133.1, 132.6, 130.0, 128.9, 126.9, 123.9, 122.5, 121.5, 121.1, 107.7, 35.0, 31.1, 21.2.

HRMS (ESI)  $m/z$ :  $[M+H]^+$  Calcd for  $C_{21}H_{23}O^+$  291.1743; Found 291.1742.

**6-phenyl-4-(*p*-tolyl)naphthalen-1-ol (3w)**

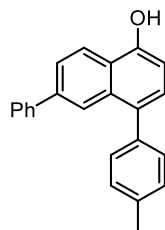

Following General Procedure A, product **3w** (35.3 mg, 57%) as a gray solid (mp: 153-155 °C) was obtained after flash chromatography (petroleum ether/ethyl acetate = 15:1).

$^1H$  NMR (400 MHz,  $CDCl_3$ )  $\delta$  8.32 (d,  $J$  = 8.7 Hz, 1H), 8.11 (d,  $J$  = 1.8 Hz, 1H), 7.75 (dd,  $J$  = 8.7, 1.8 Hz, 1H), 7.60 (d,  $J$  = 7.6 Hz, 2H), 7.40 (dd,  $J$  = 14.1, 7.7 Hz, 4H), 7.35 – 7.21 (m, 4H), 6.83 (d,  $J$  = 7.7 Hz, 1H), 5.51 (s, 1H), 2.43 (s, 3H).

$^{13}C$  NMR (100 MHz,  $CDCl_3$ )  $\delta$  150.7, 141.2, 139.1, 137.7, 136.6, 133.4, 133.0, 130.1, 129.0, 128.7, 127.5, 127.3, 127.3, 124.7, 124.0, 123.5, 122.5, 108.3, 21.2.

HRMS (ESI)  $m/z$ :  $[M-H]^-$  Calcd for  $C_{23}H_{17}O^-$  309.1285; Found 309.1277.

**6-chloro-4-(*p*-tolyl)naphthalen-1-ol (3x)**

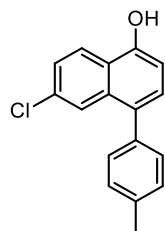

Following General Procedure A, product **3x** (26.3 mg, 49%) as a brown solid (mp: 121-123 °C) was

obtained after flash chromatography (petroleum ether/ethyl acetate = 18:1).

$^1\text{H}$  NMR (400 MHz, DMSO- $d_6$ )  $\delta$  10.49 (d,  $J$  = 2.6 Hz, 1H), 8.24 (d,  $J$  = 9.0 Hz, 1H), 7.68 (d,  $J$  = 2.1 Hz, 1H), 7.47 (dd,  $J$  = 8.9, 2.1 Hz, 1H), 7.35 – 7.25 (m, 5H), 6.97 (d,  $J$  = 7.8 Hz, 1H), 2.39 (s, 3H).

$^{13}\text{C}$  NMR (100 MHz, DMSO- $d_6$ )  $\delta$  153.4, 137.3, 136.9, 133.4, 131.9, 130.3, 130.1, 129.8, 129.5, 125.6, 125.5, 124.2, 123.6, 108.9, 21.4.

HRMS (ESI)  $m/z$ :  $[\text{M}-\text{H}]^-$  Calcd for  $\text{C}_{17}\text{H}_{12}\text{ClO}^-$  267.0582; Found 267.0574.

#### 6-fluoro-4-(*p*-tolyl)naphthalen-1-ol (**3y**)

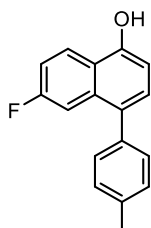

Following General Procedure A, product **3y** (28.3 mg, 56%) as a gray solid (mp: 97-99 °C) was obtained after flash chromatography (petroleum ether/ethyl acetate = 18:1).

$^1\text{H}$  NMR (400 MHz,  $\text{CDCl}_3$ )  $\delta$  8.27 (dd,  $J$  = 9.3, 5.8 Hz, 1H), 7.50 (dd,  $J$  = 11.5, 2.6 Hz, 1H), 7.38 – 7.20 (m, 6H), 6.78 (d,  $J$  = 7.7 Hz, 1H), 5.33 (s, 1H), 2.44 (s, 3H).

$^{13}\text{C}$  NMR (100 MHz,  $\text{CDCl}_3$ )  $\delta$  161.4 (d,  $J$  = 245.2 Hz), 150.9, 137.3, 136.8, 134.0 (d,  $J$  = 8.9 Hz), 132.7 (d,  $J$  = 5.4 Hz), 129.9, 129.1, 127.9, 124.8 (d,  $J$  = 9.1 Hz), 121.5, 115.2 (d,  $J$  = 25.3 Hz), 109.5 (d,  $J$  = 22.1 Hz), 107.4 (d,  $J$  = 2.2 Hz), 21.2.

$^{19}\text{F}$  NMR (376 MHz,  $\text{CDCl}_3$ )  $\delta$  -113.4.

HRMS (ESI)  $m/z$ :  $[\text{M}-\text{H}]^-$  Calcd for  $\text{C}_{17}\text{H}_{12}\text{FO}^-$  251.0878; Found 251.0870.

#### ethyl 5-hydroxy-8-(*p*-tolyl)-2-naphthoate (**3z**)

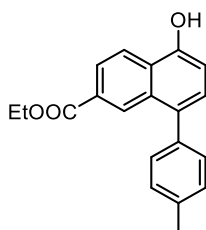

Following General Procedure A, product **3z** (25.1 mg, 41%) as a brown solid (mp: 134-136 °C) was obtained after flash chromatography (petroleum ether/ethyl acetate = 15:1).

$^1\text{H}$  NMR (400 MHz, DMSO- $d_6$ )  $\delta$  10.54 (d,  $J$  = 2.1 Hz, 1H), 8.49 (s, 1H), 8.31 (d,  $J$  = 8.8 Hz, 1H), 7.95 (dd,  $J$  = 8.8, 1.7 Hz, 1H), 7.33 (s, 5H), 7.08 (d,  $J$  = 7.8 Hz, 1H), 4.31 (q,  $J$  = 7.1 Hz, 2H), 2.41 (s, 3H), 1.29 (t,  $J$  = 7.1 Hz, 3H).

$^{13}\text{C}$  NMR (100 MHz, DMSO- $d_6$ )  $\delta$  166.5, 153.2, 137.4, 137.0, 132.1, 131.7, 130.4, 129.7, 129.0, 128.5, 128.0, 127.1, 123.9, 123.7, 110.8, 61.4, 21.4, 14.8.

HRMS (ESI)  $m/z$ :  $[\text{M}+\text{Na}]^+$  Calcd for  $\text{C}_{20}\text{H}_{18}\text{NaO}_3^+$  329.1148; Found 329.1152.

#### 7-chloro-4-(*p*-tolyl)naphthalen-1-ol (**3aa**) + 5-chloro-4-(*p*-tolyl)naphthalen-1-ol (**3aa'**)

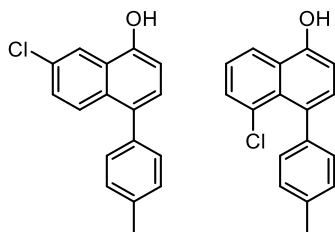

Following General Procedure B, product **3aa** + **3aa'** (26.3 mg, 49%) as a brown solid (mp: 66-68 °C) was obtained after flash chromatography (petroleum ether/ethyl acetate = 15:1).

$^1\text{H}$  NMR (400 MHz,  $\text{CDCl}_3$ )  $\delta$  8.26 (d,  $J$  = 10.0 Hz, 1H), 7.81 (d,  $J$  = 9.1 Hz, 0.5H), 7.52 (d,  $J$  = 7.4 Hz, 0.5H), 7.40 – 7.24 (m, 3H), 7.24 – 7.13 (m, 3H), 6.83 (t,  $J$  = 7.9 Hz, 1H), 5.66 (d,  $J$  = 25.0 Hz, 1H), 2.43 (d,  $J$  = 6.4 Hz, 3H).

$^{13}\text{C}$  NMR (100 MHz,  $\text{CDCl}_3$ )  $\delta$  151.0, 150.0, 140.7, 137.3, 136.8, 136.0, 133.1, 132.2, 131.4, 131.1, 131.0, 130.8, 130.0, 129.9, 129.7, 129.6, 129.0, 127.9, 127.8, 127.2, 126.9, 126.7, 125.2, 124.9, 121.6, 121.2, 109.1, 108.3, 21.3, 21.2.

HRMS (ESI)  $m/z$ :  $[\text{M-H}]^-$  Calcd for  $\text{C}_{17}\text{H}_{12}\text{ClO}^-$  267.0582; Found 267.0575.

#### 8-methyl-4-(*p*-tolyl)naphthalen-1-ol (**3ab**)

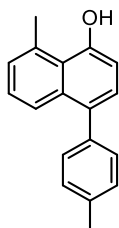

Following General Procedure B, product **3ab** (14.9 mg, 30%) as a yellow solid (mp: 73-75 °C) was obtained after flash chromatography (petroleum ether/ethyl acetate = 18:1).

$^1\text{H}$  NMR (400 MHz,  $\text{CDCl}_3$ )  $\delta$  7.67 (d,  $J$  = 8.0 Hz, 1H), 7.33 – 7.15 (m, 7H), 6.76 (d,  $J$  = 7.7 Hz, 1H), 5.30 (s, 1H), 2.99 (s, 3H), 2.44 (s, 3H).

$^{13}\text{C}$  NMR (100 MHz,  $\text{CDCl}_3$ )  $\delta$  153.2, 138.6, 136.4, 135.1, 134.5, 133.7, 130.1, 128.9, 128.1, 126.6, 125.9, 124.5, 123.9, 109.7, 25.0, 21.2.

HRMS (ESI)  $m/z$ :  $[\text{M-H}]^-$  Calcd for  $\text{C}_{18}\text{H}_{15}\text{O}^-$  247.1128; Found 247.1120.

#### 5,7-dimethyl-4-(*p*-tolyl)naphthalen-1-ol (**3ac**)

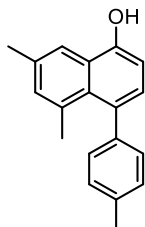

Following General Procedure A, product **3ac** (27.4 mg, 52%) as a gray solid (mp: 59-61 °C) was obtained after flash chromatography (petroleum ether/ethyl acetate = 15:1).

$^1\text{H}$  NMR (400 MHz,  $\text{CDCl}_3$ )  $\delta$  7.96 (s, 1H), 7.18 (t,  $J$  = 5.5 Hz, 5H), 7.09 (s, 1H), 7.03 (d,  $J$  = 7.6

Hz, 1H), 6.73 (d,  $J = 7.7$  Hz, 1H), 5.41 (s, 1H), 2.47 (s, 3H), 2.41 (s, 3H), 1.99 (s, 3H).

$^{13}\text{C}$  NMR (100 MHz,  $\text{CDCl}_3$ )  $\delta$  150.6, 142.2, 136.0, 135.2, 134.4, 133.2, 132.5, 130.4, 129.7, 128.2, 128.1, 125.6, 119.2, 107.4, 25.1, 21.4, 21.2.

HRMS (ESI)  $m/z$ :  $[\text{M}-\text{H}]^-$  Calcd for  $\text{C}_{19}\text{H}_{17}\text{O}^-$  261.1285; Found 261.1276.

#### 5,7-dichloro-4-(*p*-tolyl)naphthalen-1-ol (**3ad**)

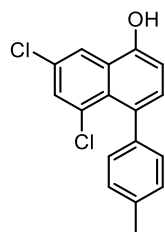

Following General Procedure A, product **3ad** (32.8 mg, 54%) as a brown liquid was obtained after flash chromatography (petroleum ether/ethyl acetate = 15:1).

$^1\text{H}$  NMR (400 MHz,  $\text{CDCl}_3$ )  $\delta$  8.26 (d,  $J = 2.3$  Hz, 1H), 7.49 (d,  $J = 2.3$  Hz, 1H), 7.17 (d,  $J = 10.8$  Hz, 5H), 6.83 (d,  $J = 7.7$  Hz, 1H), 5.76 (s, 1H), 2.41 (s, 3H).

$^{13}\text{C}$  NMR (100 MHz,  $\text{CDCl}_3$ )  $\delta$  150.3, 140.0, 136.3, 132.5, 132.3, 131.0, 130.1, 130.0, 129.7, 128.1, 128.0, 126.9, 120.9, 109.2, 21.2.

HRMS (ESI)  $m/z$ :  $[\text{M}-\text{H}]^-$  Calcd for  $\text{C}_{17}\text{H}_{11}\text{Cl}_2\text{O}^-$  301.0192; Found 301.0187.

#### 4-(*p*-tolyl)phenanthren-1-ol (**3ae**)

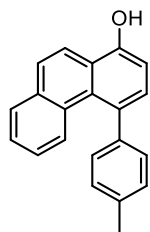

Following General Procedure A, product **3ae** (30.1 mg, 53%) as a brown solid (mp: 53-55 °C) was obtained after flash chromatography (petroleum ether/ethyl acetate = 8:1).

$^1\text{H}$  NMR (400 MHz,  $\text{CDCl}_3$ )  $\delta$  8.21 (d,  $J = 9.1$  Hz, 1H), 7.84 – 7.78 (m, 2H), 7.73 (d,  $J = 9.1$  Hz, 1H), 7.45 – 7.38 (m, 1H), 7.29 – 7.21 (m, 5H), 7.14 – 7.06 (m, 1H), 6.92 (d,  $J = 7.8$  Hz, 1H), 5.48 (s, 1H), 2.44 (s, 3H).

$^{13}\text{C}$  NMR (100 MHz,  $\text{CDCl}_3$ )  $\delta$  151.0, 142.4, 136.3, 133.5, 133.3, 130.7, 130.2, 129.8, 129.6, 129.0, 128.4, 128.3, 126.8, 126.1, 124.7, 122.9, 120.0, 109.9, 21.3.

HRMS (ESI)  $m/z$ :  $[\text{M}+\text{H}]^+$  Calcd for  $\text{C}_{21}\text{H}_{17}\text{O}^+$  285.1274; Found 285.1265.

#### 1-(*p*-tolyl)phenanthren-4-ol (**3af**)

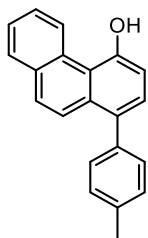

Following General Procedure A, product **3af** (26.8 mg, 47%) as a gray liquid was obtained after flash chromatography (petroleum ether/ethyl acetate = 8:1).

$^1\text{H}$  NMR (400 MHz,  $\text{CDCl}_3$ )  $\delta$  9.70 (d,  $J$  = 8.6 Hz, 1H), 7.85 (d,  $J$  = 7.6 Hz, 1H), 7.77 (d,  $J$  = 9.1 Hz, 1H), 7.68 – 7.56 (m, 3H), 7.38 – 7.27 (m, 5H), 6.99 (d,  $J$  = 7.8 Hz, 1H), 5.82 (s, 1H), 2.45 (s, 3H).

$^{13}\text{C}$  NMR (100 MHz,  $\text{CDCl}_3$ )  $\delta$  153.6, 138.4, 136.6, 133.8, 132.5, 132.3, 130.3, 128.9, 128.7, 128.0, 127.8, 127.7, 126.4, 126.1, 124.9, 119.4, 112.7, 21.2.

HRMS (ESI)  $m/z$ :  $[\text{M}+\text{H}]^+$  Calcd for  $\text{C}_{21}\text{H}_{17}\text{O}^+$  285.1274; Found 285.1266.

#### 7-(*p*-tolyl)benzo[*b*]thiophen-4-ol (**3ag**)

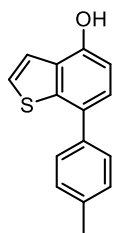

Following General Procedure A, product **3ag** (23.1 mg, 48%) as a gray solid (mp: 95-97 °C) was obtained after flash chromatography (petroleum ether/ethyl acetate = 8:1).

$^1\text{H}$  NMR (400 MHz,  $\text{DMSO}-d_6$ )  $\delta$  10.46 (s, 1H), 7.72 (d,  $J$  = 5.5 Hz, 1H), 7.39 (d,  $J$  = 6.0 Hz, 3H), 7.28 (d,  $J$  = 7.7 Hz, 2H), 7.19 (d,  $J$  = 7.9 Hz, 1H), 6.86 (d,  $J$  = 7.9 Hz, 1H), 2.36 (s, 3H).

$^{13}\text{C}$  NMR (100 MHz,  $\text{DMSO}-d_6$ )  $\delta$  152.0, 139.5, 138.2, 136.4, 129.7, 129.0, 128.9, 128.0, 128.0, 126.6, 123.8, 109.1, 21.3.

HRMS (ESI)  $m/z$ :  $[\text{M}-\text{H}]^-$  Calcd for  $\text{C}_{15}\text{H}_{11}\text{OS}^-$  239.0536; Found 239.0529.

#### 8-(*p*-tolyl)naphtho[2,3-*d*][1,3]dioxol-5-ol (**3ah'**) + 9-(*p*-tolyl)naphtho[1,2-*d*][1,3]dioxol-6-ol (**3ah**)

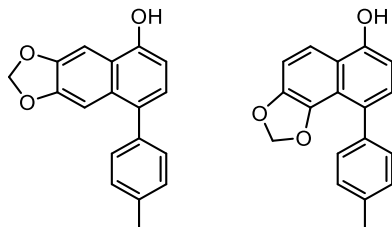

Following General Procedure A, product **3ah'** + **3ah** (33.9 mg, 61%) as a gray solid (mp: 71-73 °C) was obtained after flash chromatography (petroleum ether/ethyl acetate = 10:1).

$^1\text{H}$  NMR (400 MHz,  $\text{DMSO}-d_6$ )  $\delta$  10.32 (s, 0.2H), 10.08 (s, 0.8H), 7.87 (d,  $J$  = 8.9 Hz, 0.2H), 7.49



(s, 0.8H), 7.30 – 7.19 (m, 3.8H), 7.13 (d,  $J = 7.8$  Hz, 0.4H), 7.08 – 6.99 (m, 1.8H), 6.82 (d,  $J = 7.8$  Hz, 0.8H), 6.77 (d,  $J = 7.8$  Hz, 0.2H), 6.08 (s, 1.6H), 5.90 (s, 0.4H), 2.35 (d,  $J = 10.5$  Hz, 3H).

$^{13}\text{C}$   $^{13}\text{C}$  NMR (100 MHz, DMSO- $d_6$ )  $\delta$  153.6, 152.6, 148.3, 146.8, 144.7, 141.3, 139.2, 138.4, 136.4, 135.7, 130.3, 130.14, 130.07, 129.7, 129.5, 128.2, 126.5, 126.4, 122.4, 121.4, 119.5, 117.5, 109.6, 107.6, 106.2, 101.9, 101.7, 100.9, 99.2, 21.32, 21.29.

HRMS (ESI)  $m/z$ :  $[\text{M}-\text{H}]^-$  Calcd for  $\text{C}_{18}\text{H}_{13}\text{O}_3^-$  277.0870; Found 277.0864.

#### 5-hydroxy-*N,N*-dipropyl-8-(*p*-tolyl)naphthalene-2-sulfonamide (3ai)

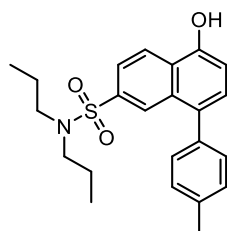

Following General Procedure A, product **3ai** (41.3 mg, 52%) as a brown liquid was obtained after flash chromatography (petroleum ether/ethyl acetate = 4:1).

$^1\text{H}$  NMR (400 MHz,  $\text{CDCl}_3$ )  $\delta$  8.45 – 8.28 (m, 2H), 7.76 (dd,  $J = 8.8$ , 1.9 Hz, 1H), 7.33 – 7.19 (m, 5H), 7.05 – 6.95 (m, 2H), 3.14 – 3.02 (m, 4H), 2.40 (s, 3H), 1.59 – 1.45 (m, 4H), 0.83 (t,  $J = 7.4$  Hz, 6H).

$^{13}\text{C}$  NMR (100 MHz,  $\text{CDCl}_3$ )  $\delta$  151.3, 137.1, 137.0, 136.6, 133.7, 131.6, 129.8, 129.2, 128.5, 126.0, 125.9, 123.9, 121.2, 110.8, 49.9, 21.8, 21.1, 11.1.

HRMS (ESI)  $m/z$ :  $[\text{M}+\text{H}]^+$  Calcd for  $\text{C}_{23}\text{H}_{28}\text{NO}_3\text{S}^+$  398.1784; Found 398.1782.

#### 1-(allyloxy)-4-(*p*-tolyl)naphthalene (4a)

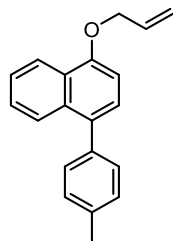

$^1\text{H}$  NMR (400 MHz,  $\text{CDCl}_3$ )  $\delta$  8.39 (d,  $J = 8.2$  Hz, 1H), 7.88 (d,  $J = 8.1$  Hz, 1H), 7.51 – 7.39 (m, 2H), 7.35 (d,  $J = 7.8$  Hz, 2H), 7.30 – 7.23 (m, 3H), 6.83 (d,  $J = 7.9$  Hz, 1H), 6.24 – 6.11 (m, 1H), 5.53 (dd,  $J = 17.2$ , 1.7 Hz, 1H), 5.34 (dd,  $J = 10.5$ , 1.6 Hz, 1H), 4.72 (d,  $J = 5.3$  Hz, 2H), 2.43 (s, 3H).

$^{13}\text{C}$  NMR (100 MHz,  $\text{CDCl}_3$ )  $\delta$  153.6, 137.9, 136.5, 133.3, 132.8, 132.6, 130.1, 128.9, 126.7, 126.4, 125.8, 125.0, 122.3, 117.4, 104.7, 68.9, 21.2.

HRMS (ESI)  $m/z$ :  $[\text{M}+\text{H}]^+$  Calcd for  $\text{C}_{20}\text{H}_{19}\text{O}^+$  275.1430; Found 275.1425.

#### 4-(*p*-tolyl)naphthalen-1-yl trifluoromethanesulfonate (4b)

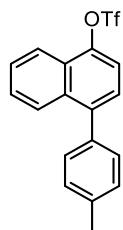

$^1\text{H}$  NMR (400 MHz,  $\text{CDCl}_3$ )  $\delta$  8.13 (d,  $J = 8.5$  Hz, 1H), 7.93 (d,  $J = 8.6$  Hz, 1H), 7.63 (t,  $J = 7.5$  Hz, 1H), 7.55 – 7.44 (m, 2H), 7.41 – 7.25 (m, 5H), 2.44 (s, 3H).

$^{13}\text{C}$  NMR (100 MHz,  $\text{CDCl}_3$ )  $\delta$  144.9, 141.2, 137.7, 136.3, 133.1, 129.8, 129.1, 127.6, 127.3, 126.7, 126.6, 125.9, 120.9, 118.8 (q,  $J = 320.3$  Hz), 117.3, 21.2.

$^{19}\text{F}$  NMR (376 MHz,  $\text{CDCl}_3$ )  $\delta$  -73.3.

HRMS (ESI)  $m/z$ :  $[\text{M}+\text{H}]^+$  Calcd for  $\text{C}_{18}\text{H}_{14}\text{F}_3\text{O}_3\text{S}^+$  367.0610; Found 367.0602.

## 8. References

- [1] (a) A. G. Talero, B. S. Martins and A. C. B. Burtoloso, *Org. Lett.*, 2018, **20**, 7206; (b) Y. Xu, Y. Gao, L. Su, H. Wu, H. Tian, M. Zeng, C. Xu, X. Zhu and K. Liao, *Angew. Chem. Int. Ed.*, 2023, **62**, e202313638.
- [2] N. Jain and M. A. Ciufolini, *Synlett.*, 2015, **26**, 631.
- [3] Y. Xu, X. Yang, X. Zhou, L. Kong and X. Li, *Org. Lett.*, 2017, **19**, 4307.
- [4] H. Huang, Y. Lu, M. Gui, N. Wang and H. Li, *Org. Lett.*, 2025, **27**, 13957.

## 9. Copies of $^1\text{H}$ , $^{13}\text{C}$ and $^{19}\text{F}$ NMR spectra of all products

### $^1\text{H}$ NMR spectra of 3a (400 MHz, $\text{CDCl}_3$ )

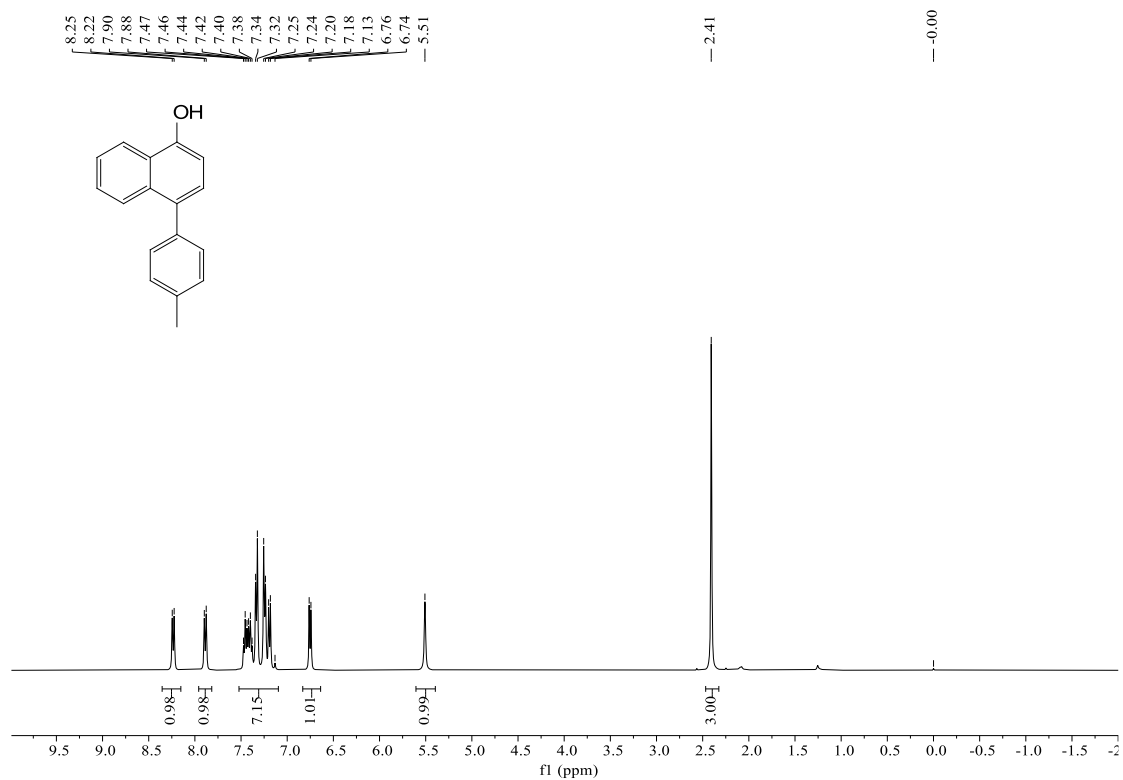

### $^{13}\text{C}$ NMR spectra of 3a (100 MHz, $\text{CDCl}_3$ )

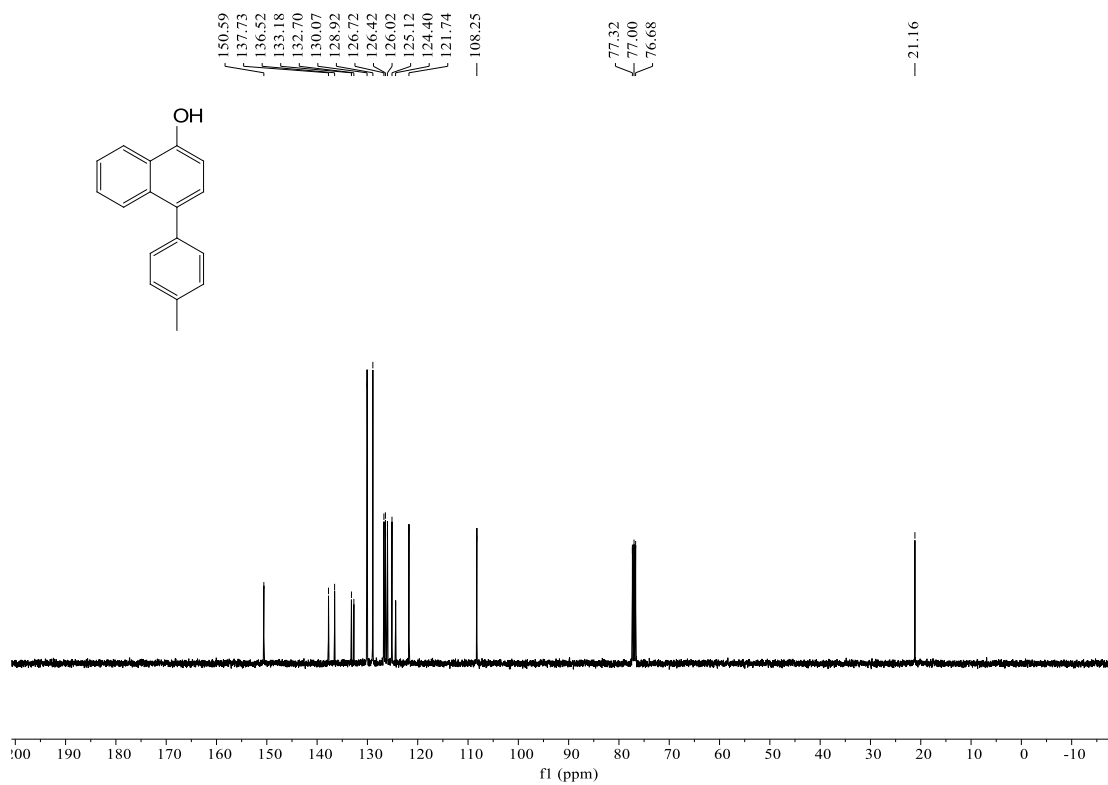

# <sup>1</sup>H NMR spectra of 3b (400 MHz, CDCl<sub>3</sub>)

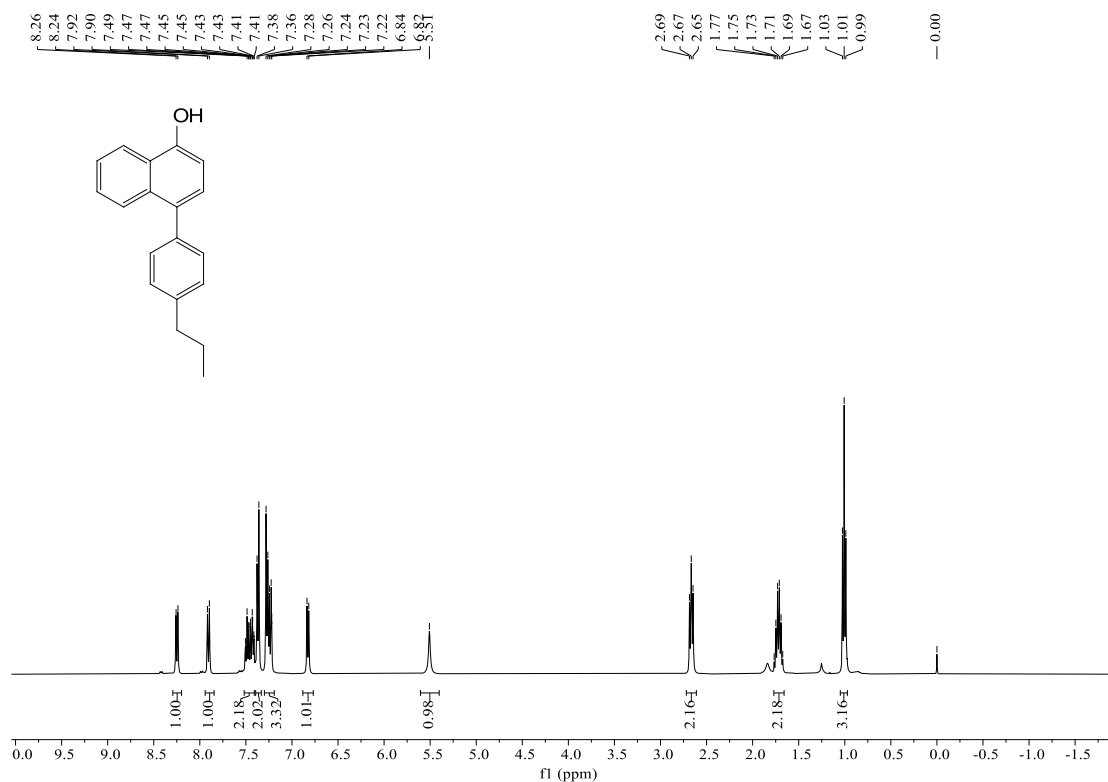

# <sup>13</sup>C NMR spectra of 3b (100 MHz, CDCl<sub>3</sub>)

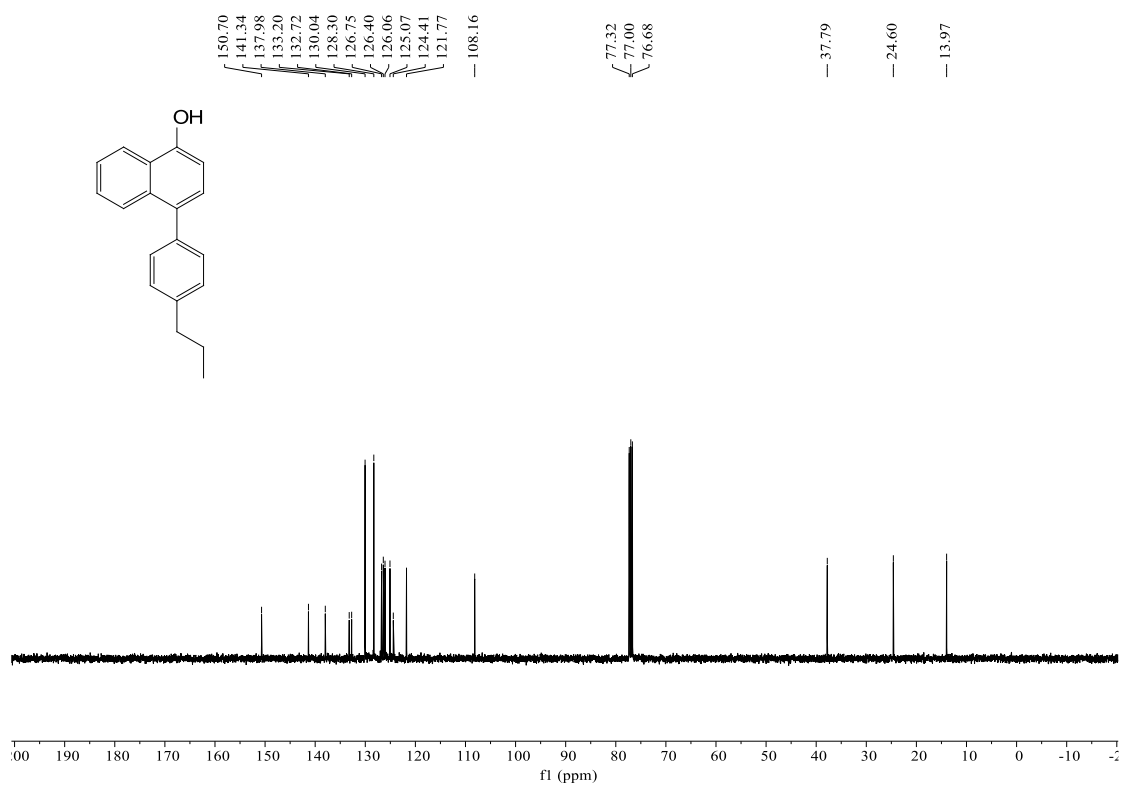

# <sup>1</sup>H NMR spectra of 3c (400 MHz, CDCl<sub>3</sub>)

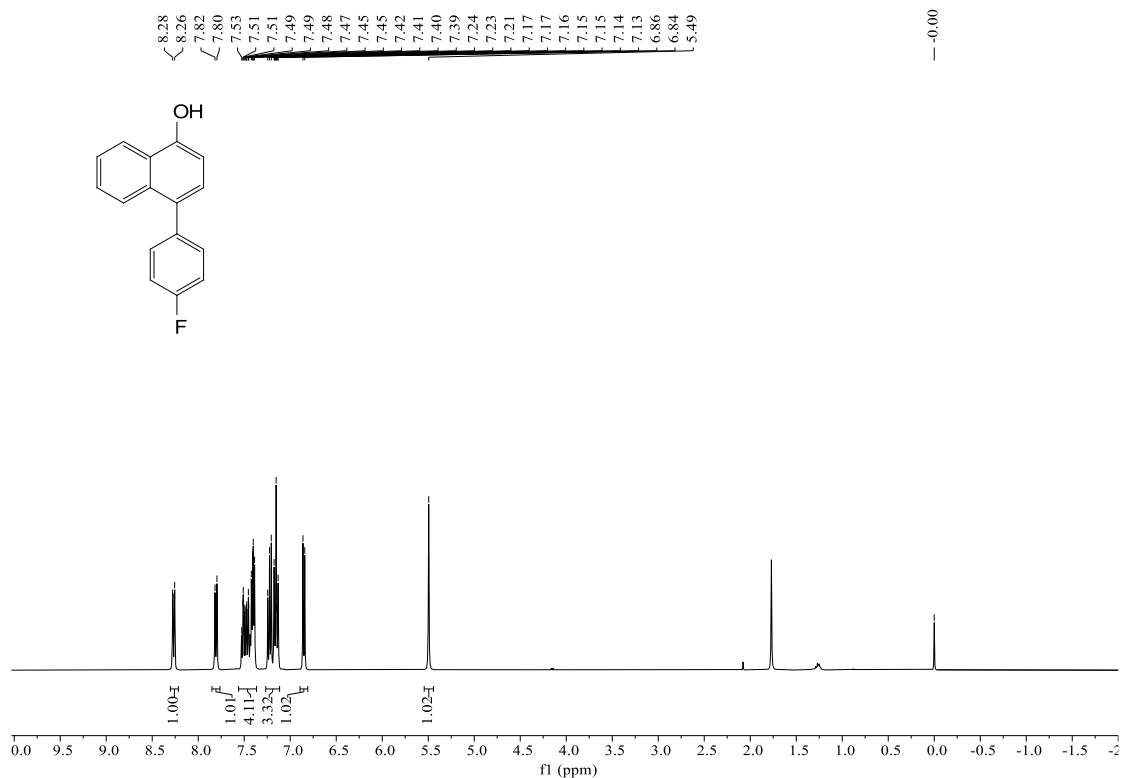

# <sup>13</sup>C NMR spectra of 3c (100 MHz, CDCl<sub>3</sub>)

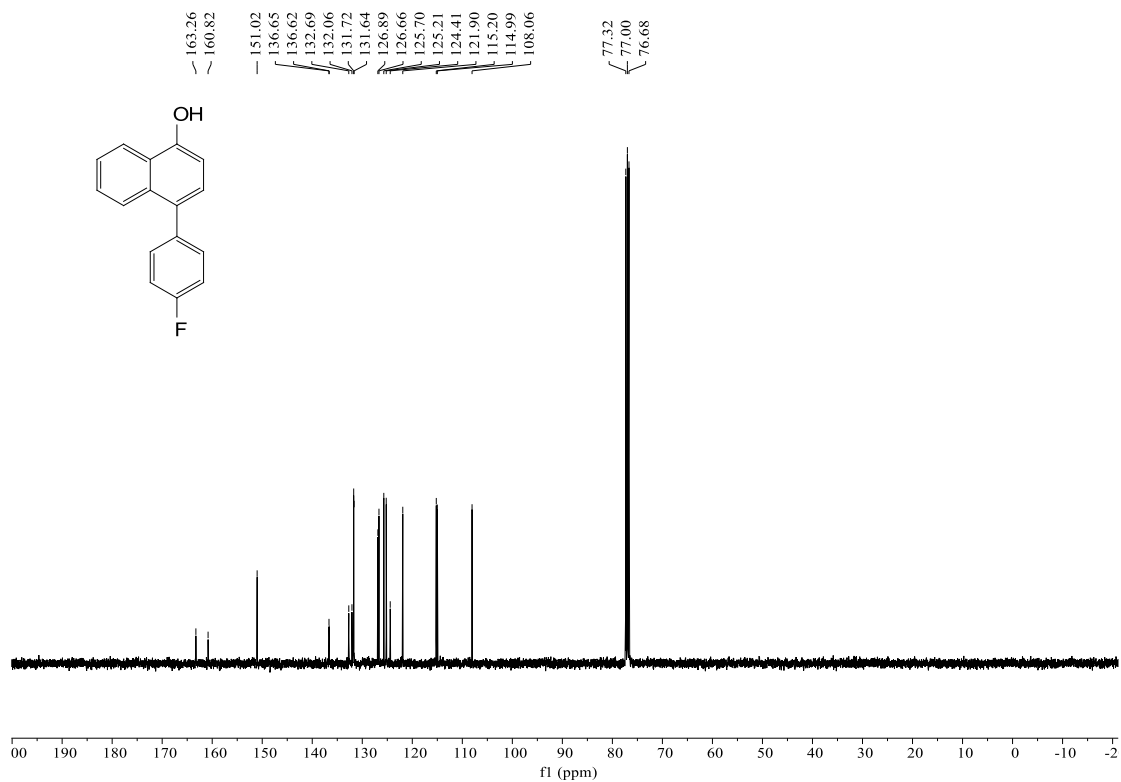

**$^{19}\text{F}$  NMR spectra of 3c (376 MHz,  $\text{CDCl}_3$ )**

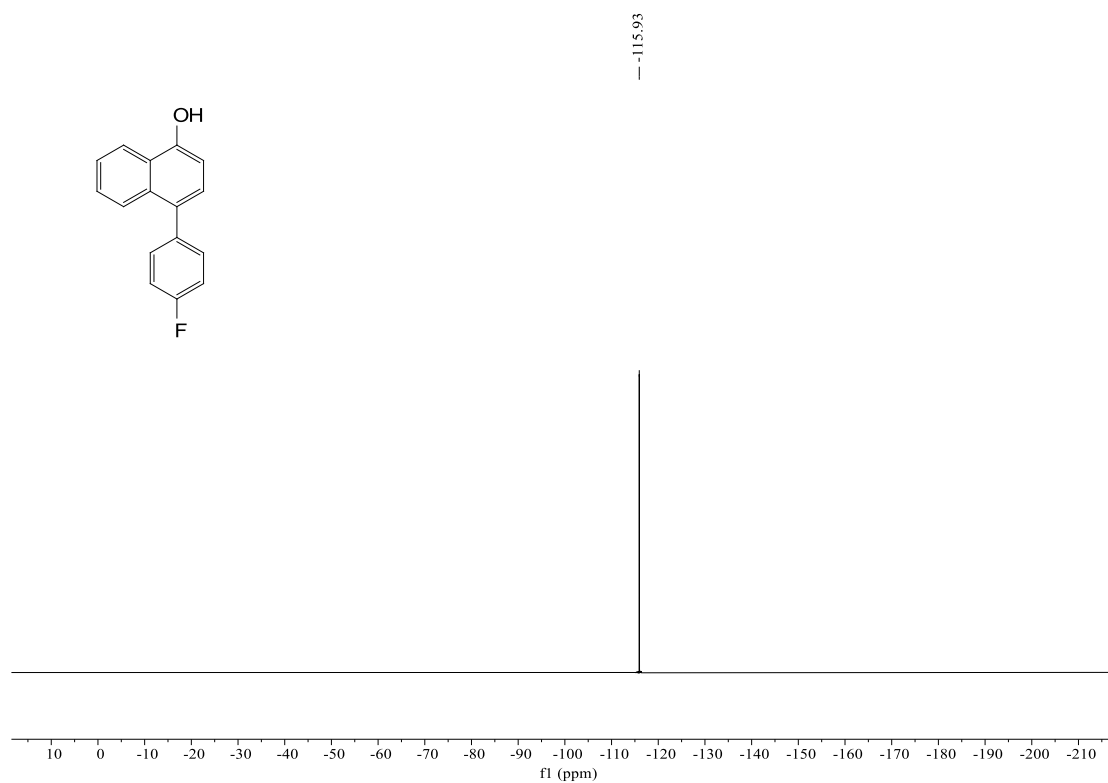

**$^1\text{H}$  NMR spectra of 3d (400 MHz,  $\text{CDCl}_3$ )**

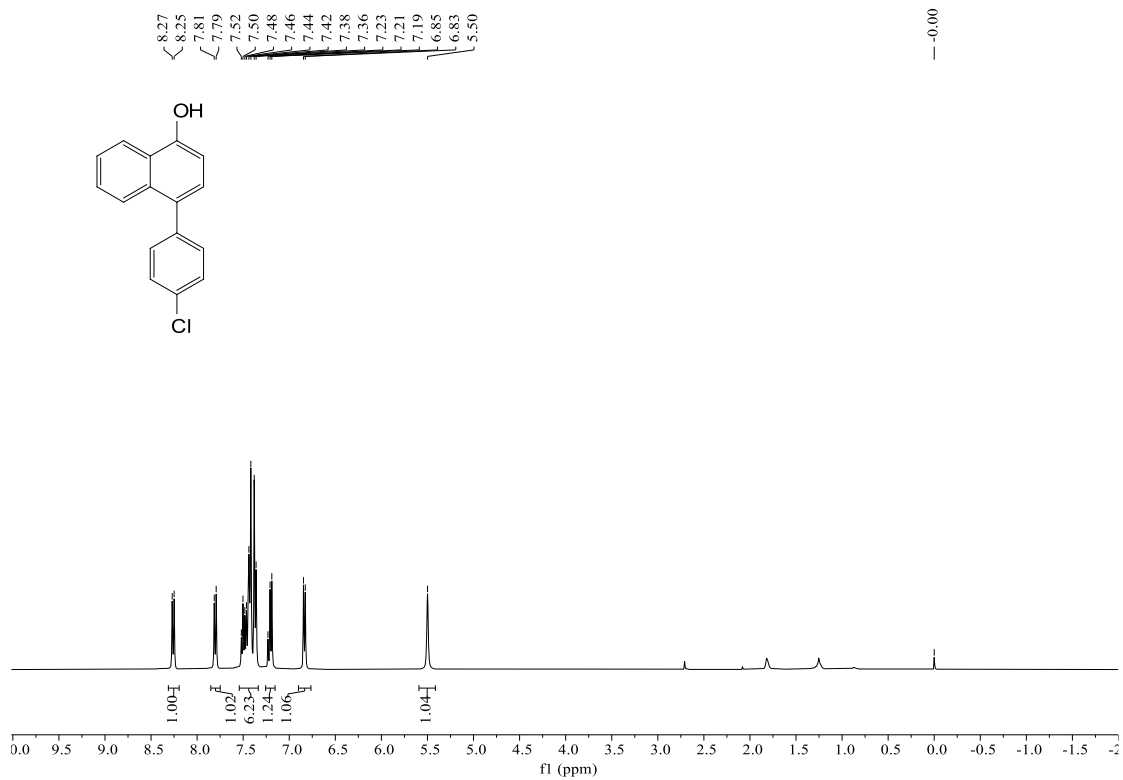

Chemical structure of 4-(4-chlorophenyl)-2-naphthol is shown above the spectrum. The spectrum displays peaks corresponding to the chemical structure, with the following chemical shifts (ppm) labeled above the peaks:

151.16, 139.16, 132.89, 132.48, 131.82, 131.48, 128.41, 126.86, 126.75, 125.58, 125.27, 124.42, 121.94, 108.09, 77.32, 77.00, 76.68.

Chemical structure: COC(=O)c1ccc(cc1)-c2ccc(O)cc2

<sup>1</sup>H NMR spectrum (CDCl<sub>3</sub>) showing peaks and integration values:

| Chemical Shift (ppm)                                                                                 | Integration                              |
|------------------------------------------------------------------------------------------------------|------------------------------------------|
| 8.33, 8.31, 8.16, 8.14, 7.84, 7.82, 7.55, 7.53, 7.51, 7.49, 7.47, 7.45, 7.45, 7.26, 7.24, 6.93, 6.87 | 0.98, 1.99, 1.00, 4.10, 1.14, 0.98, 0.98 |
| 3.99                                                                                                 | 3.00                                     |
| 0.00                                                                                                 | -                                        |



**$^{13}\text{C}$  NMR spectra of 3e (100 MHz,  $\text{CDCl}_3$ )**

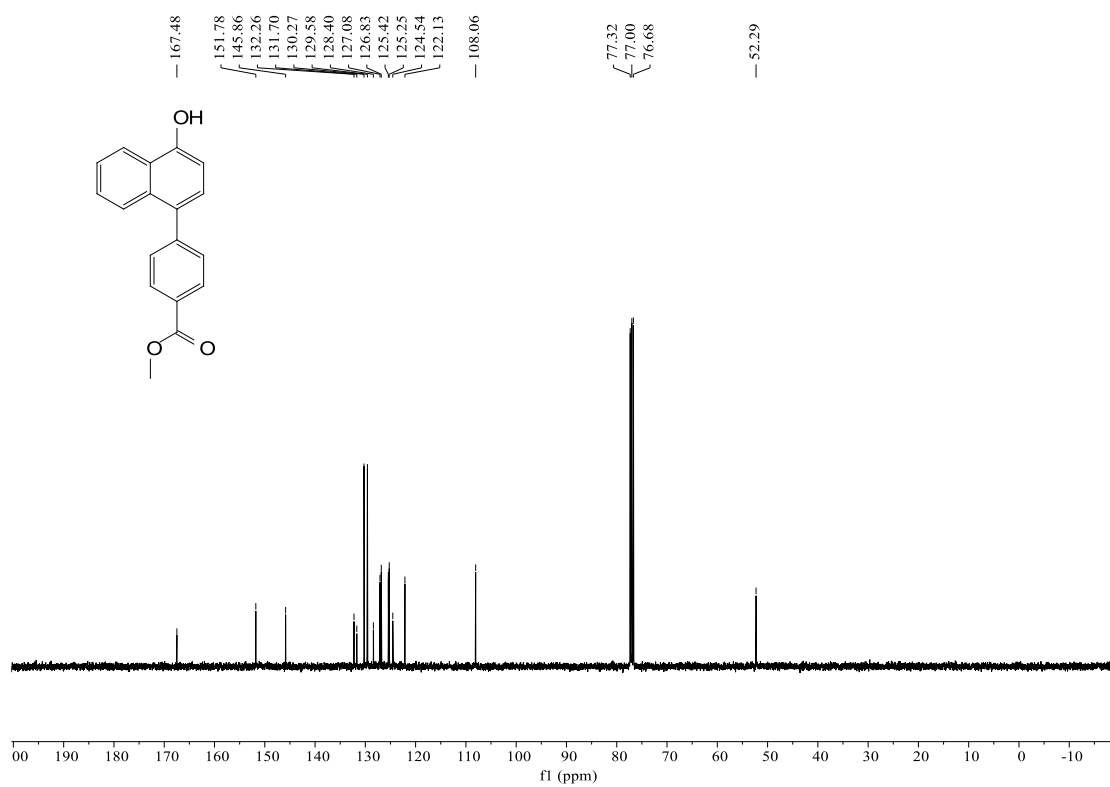

**$^1\text{H}$  NMR spectra of 3f (400 MHz,  $\text{CDCl}_3$ )**

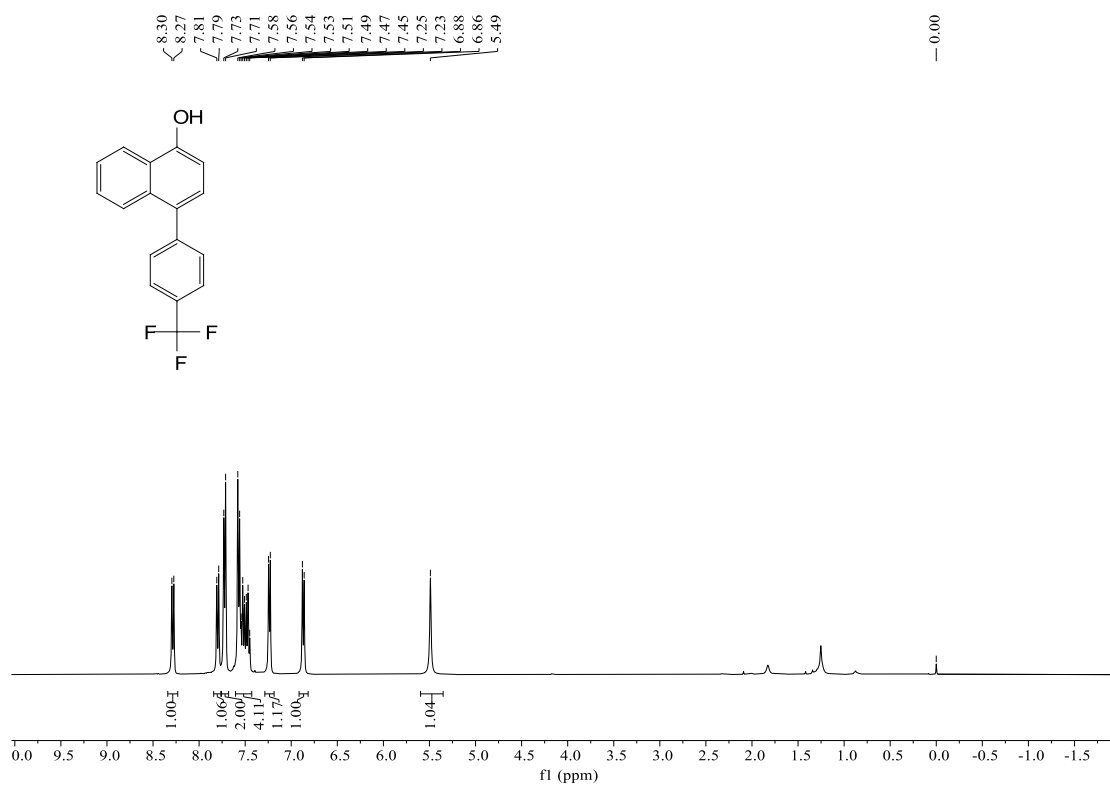

**$^{13}\text{C}$  NMR spectra of 3f (100 MHz,  $\text{CDCl}_3$ )**

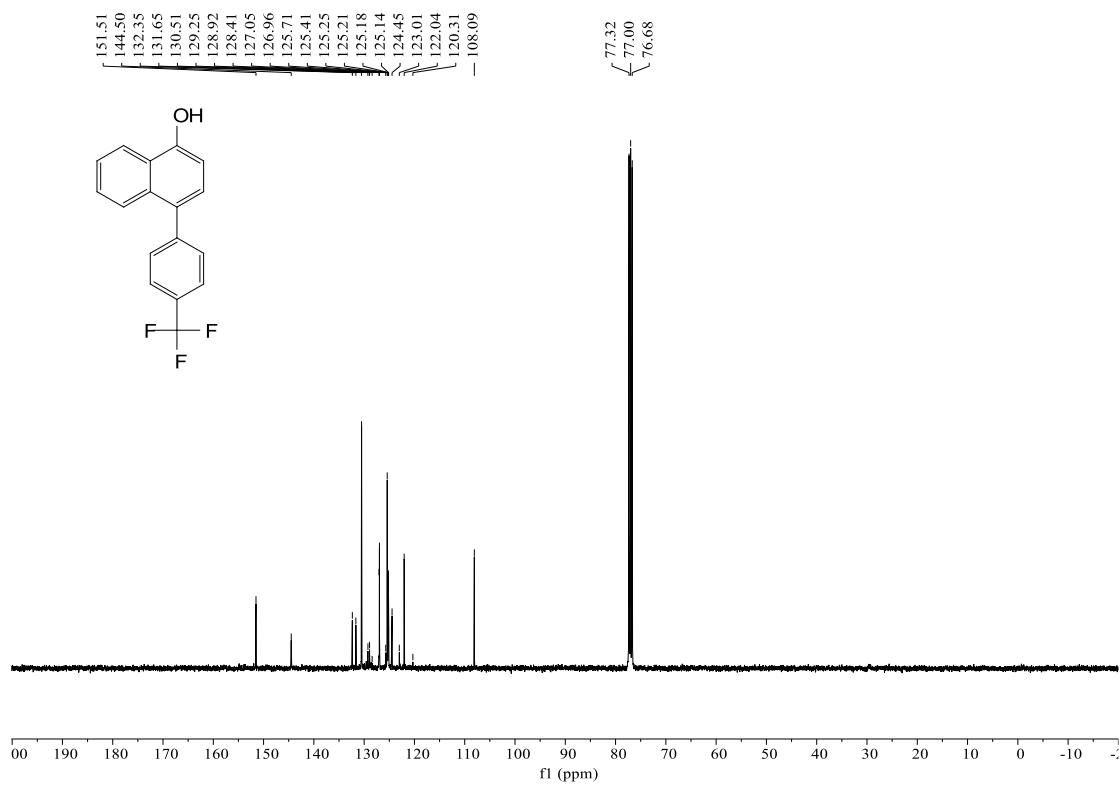

**$^{19}\text{F}$  NMR spectra of 3f (376 MHz,  $\text{CDCl}_3$ )**

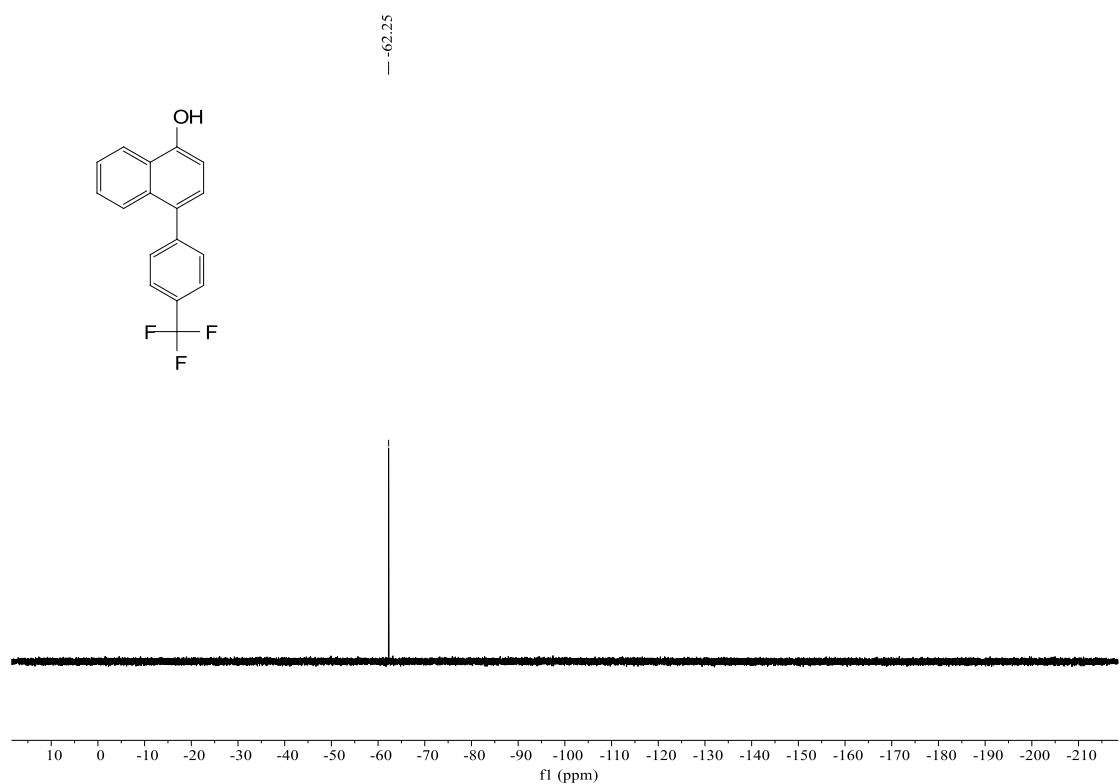

# <sup>1</sup>H NMR spectra of 3g (400 MHz, CDCl<sub>3</sub>)

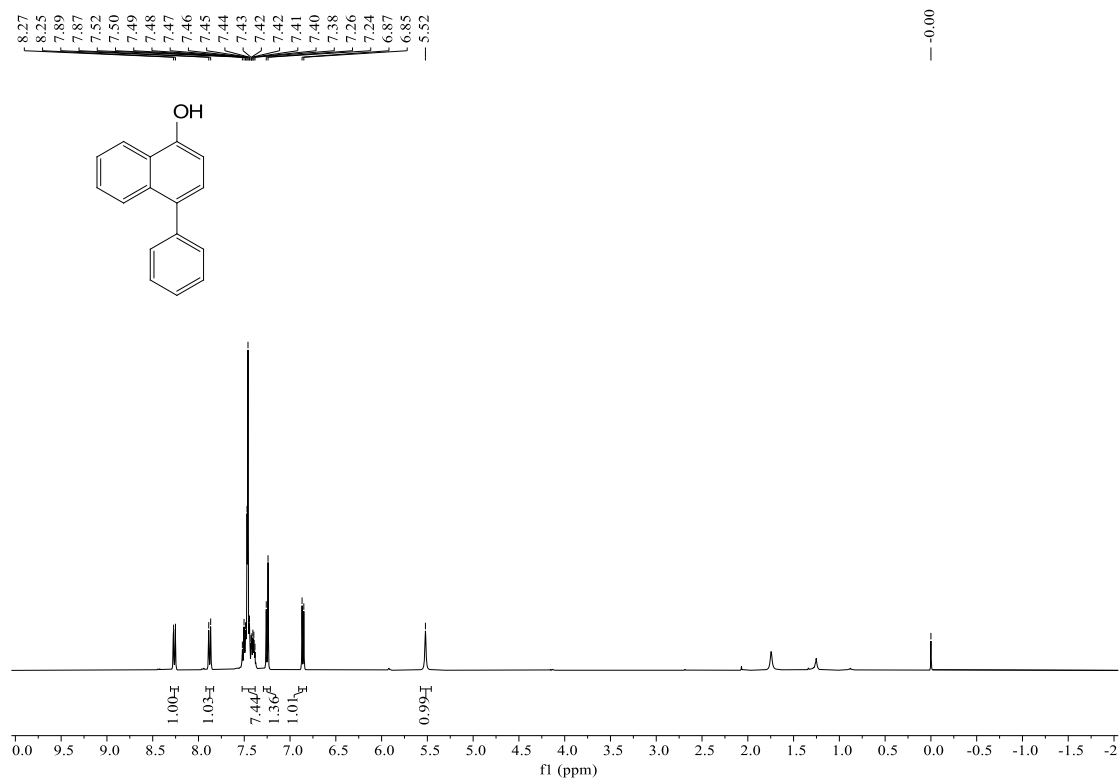

# <sup>13</sup>C NMR spectra of 3g (100 MHz, CDCl<sub>3</sub>)

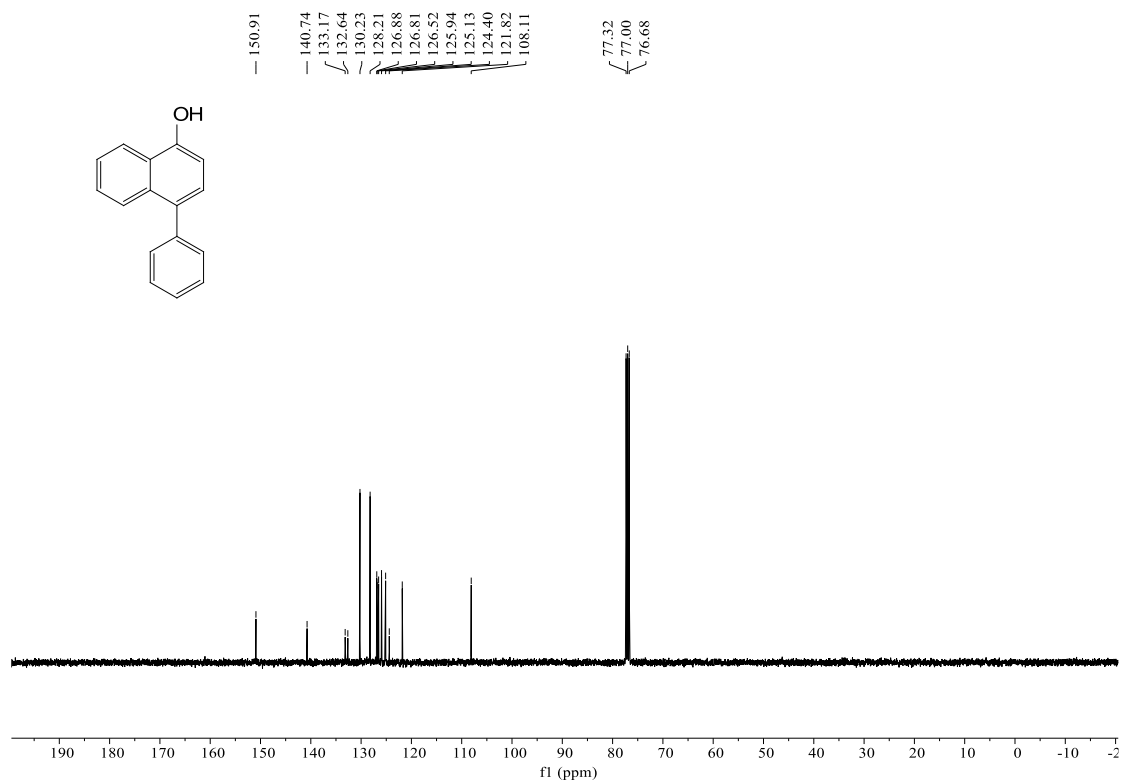

**<sup>1</sup>H NMR spectra of 3h (400 MHz, CDCl<sub>3</sub>)**

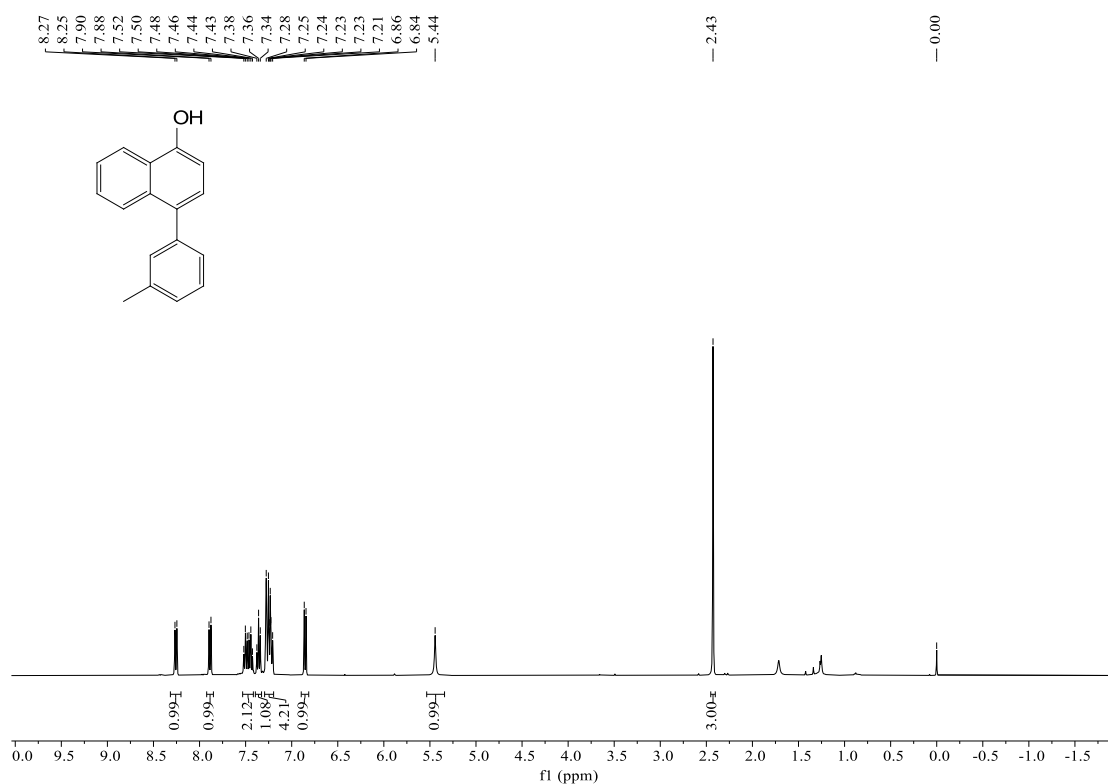

**<sup>13</sup>C NMR spectra of 3h (100 MHz, CDCl<sub>3</sub>)**

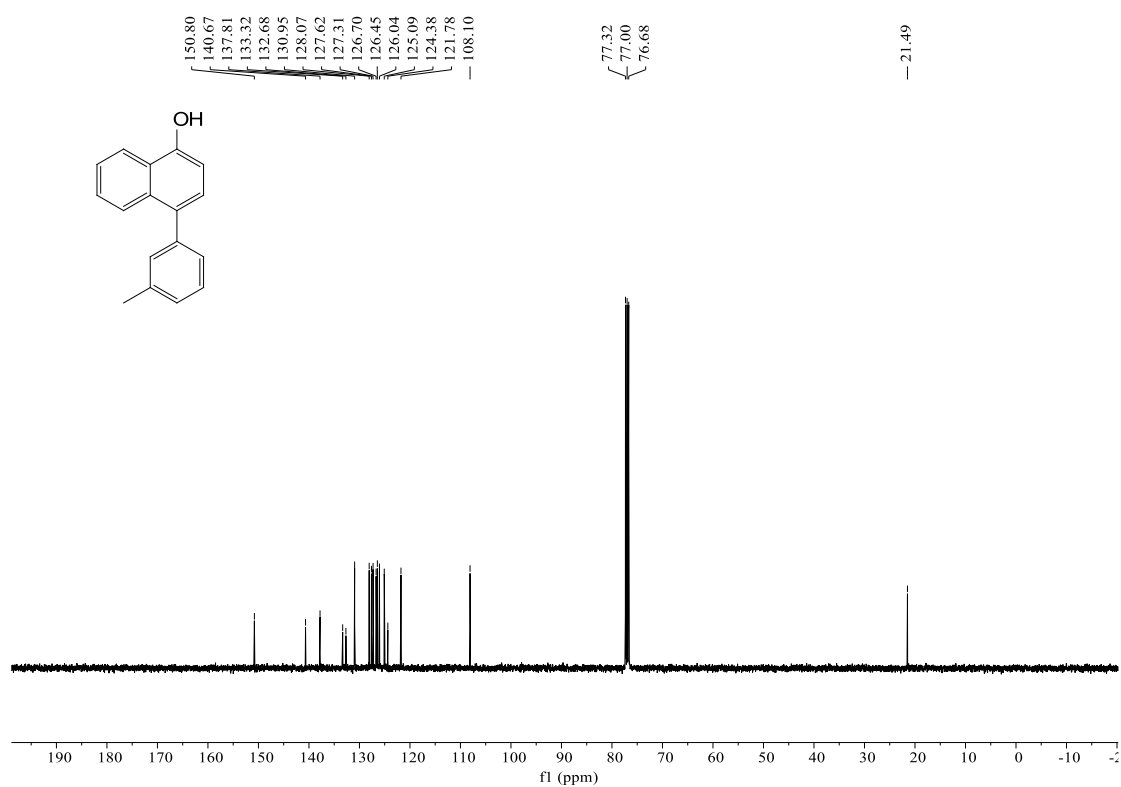

# <sup>1</sup>H NMR spectra of 3i (400 MHz, CDCl<sub>3</sub>)

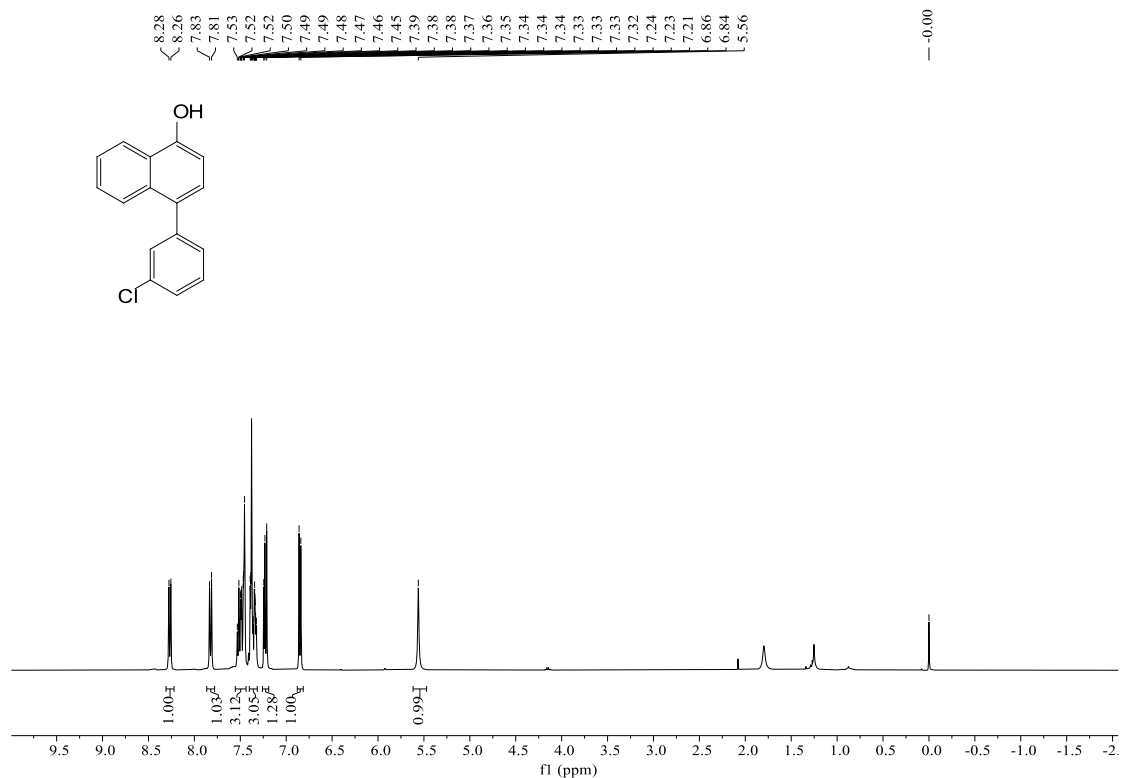

# <sup>13</sup>C NMR spectra of 3i (100 MHz, CDCl<sub>3</sub>)

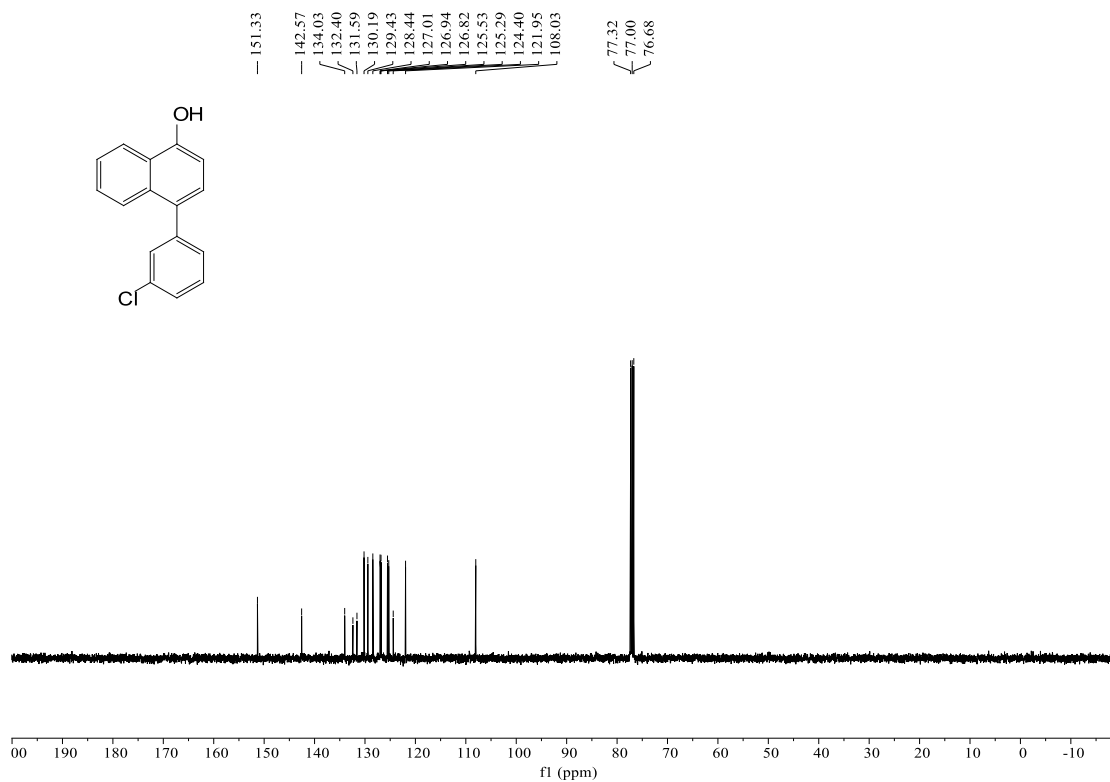

# <sup>1</sup>H NMR spectra of 3j (400 MHz, CDCl<sub>3</sub>)

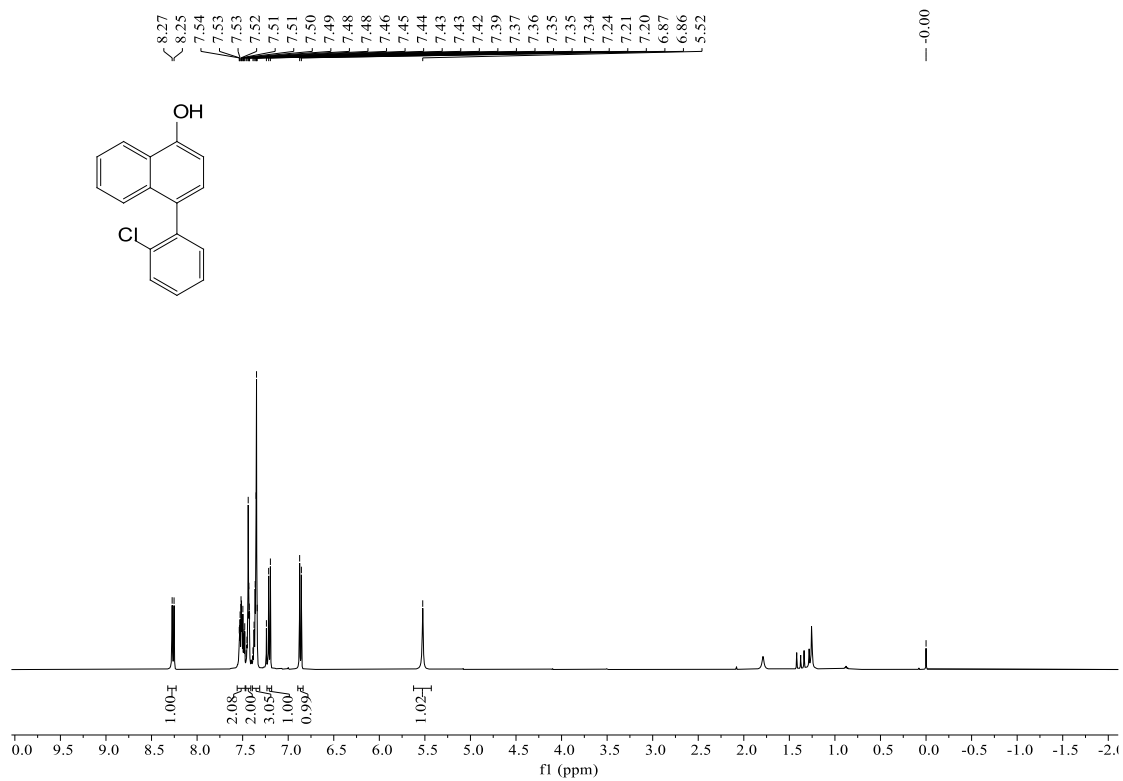

# <sup>13</sup>C NMR spectra of 3j (100 MHz, CDCl<sub>3</sub>)

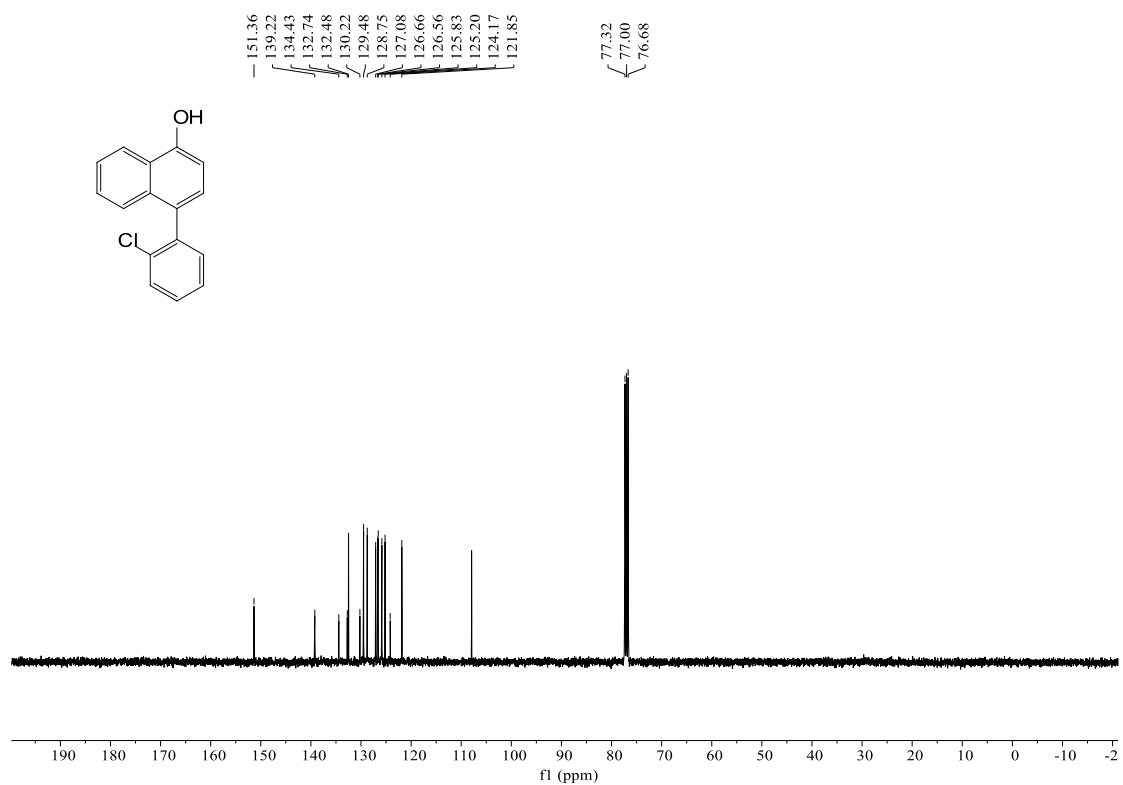

# <sup>1</sup>H NMR spectra of 3k (400 MHz, CDCl<sub>3</sub>)

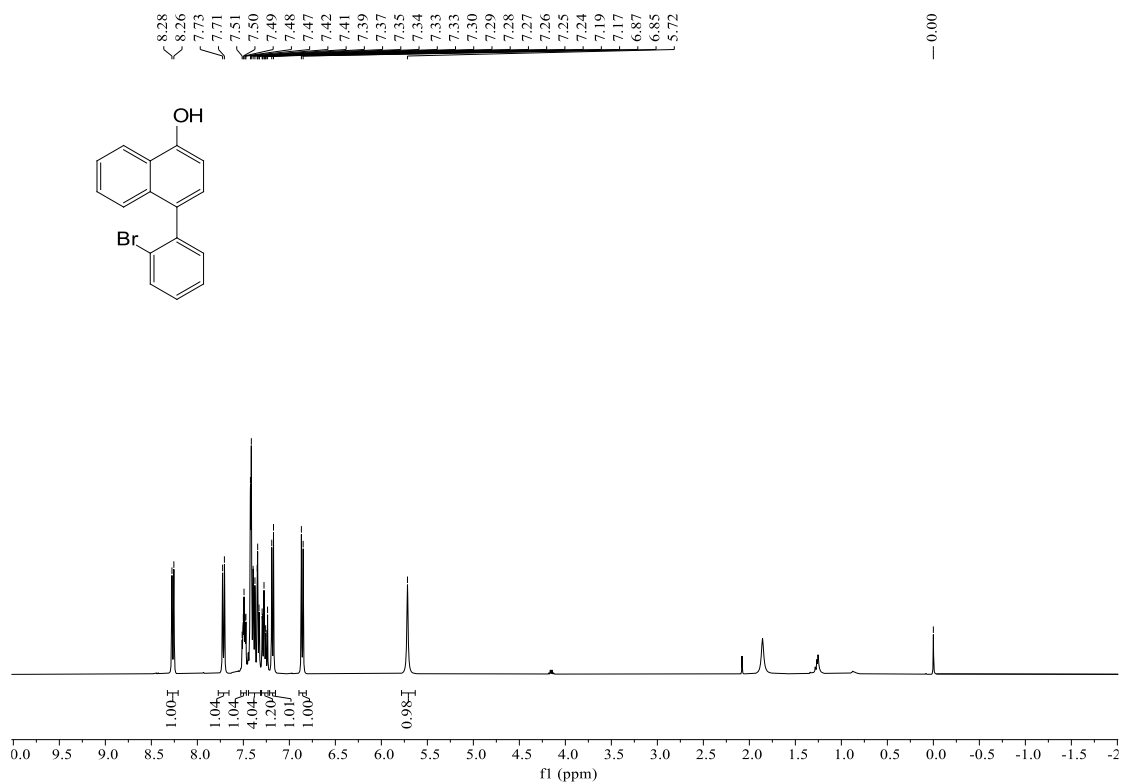

# <sup>13</sup>C NMR spectra of 3k (100 MHz, CDCl<sub>3</sub>)

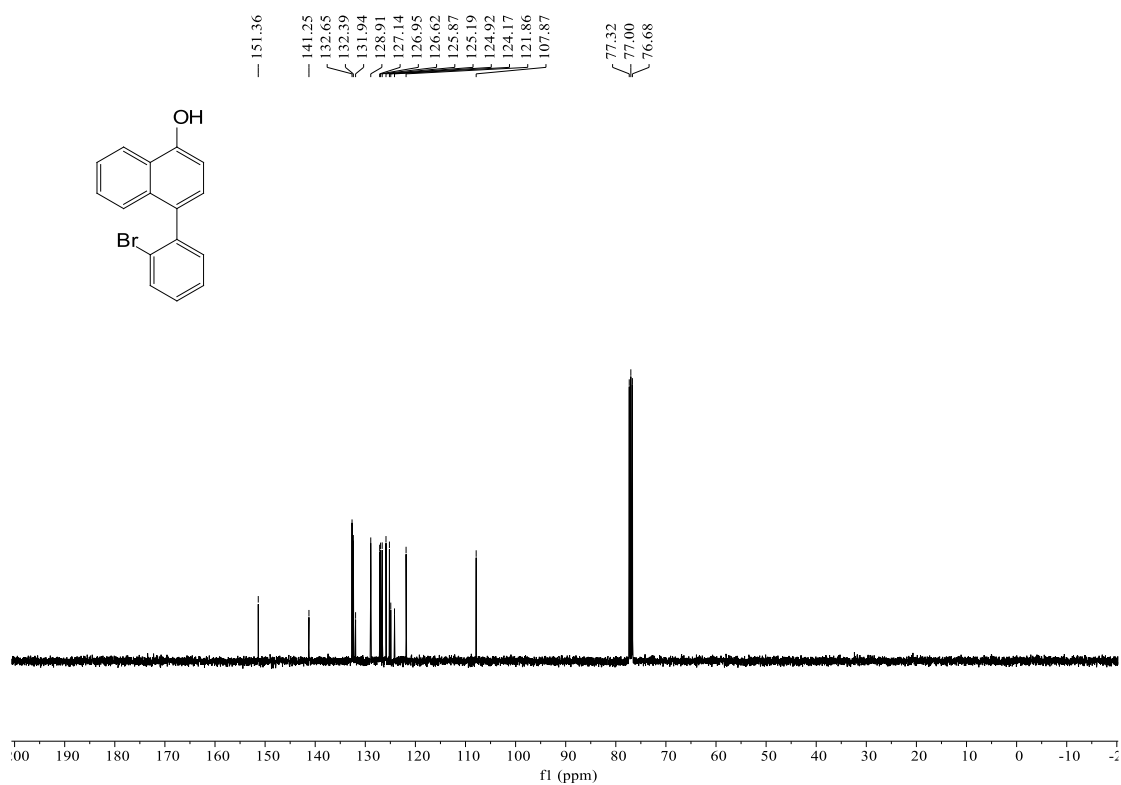

# <sup>1</sup>H NMR spectra of 3l (400 MHz, CDCl<sub>3</sub>)

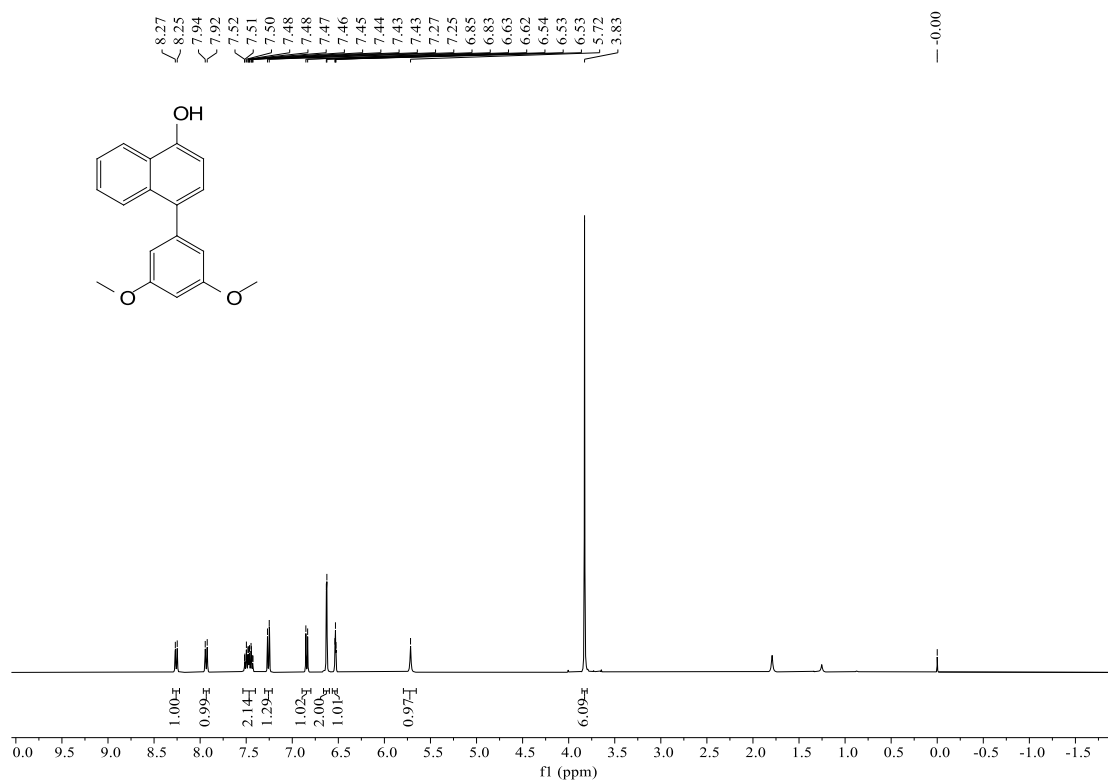

# <sup>13</sup>C NMR spectra of 3l (100 MHz, CDCl<sub>3</sub>)

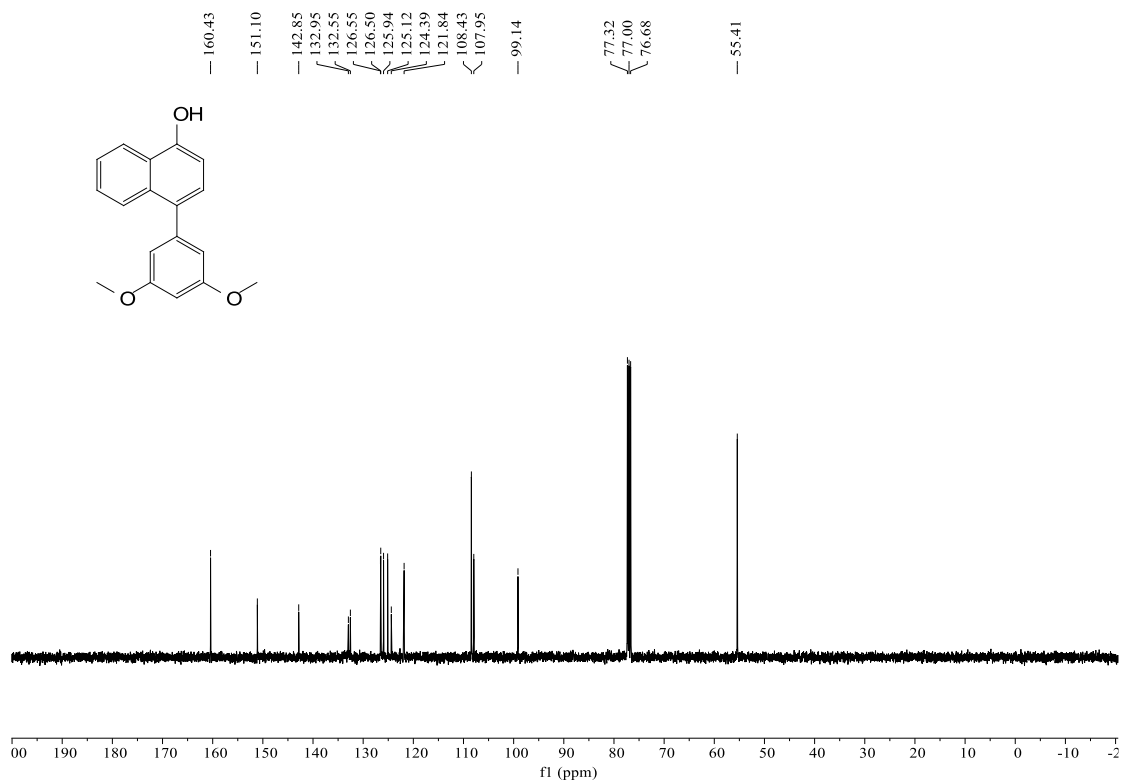



**$^1\text{H}$  NMR spectra of 3m (400 MHz, DMSO- $d_6$ )**

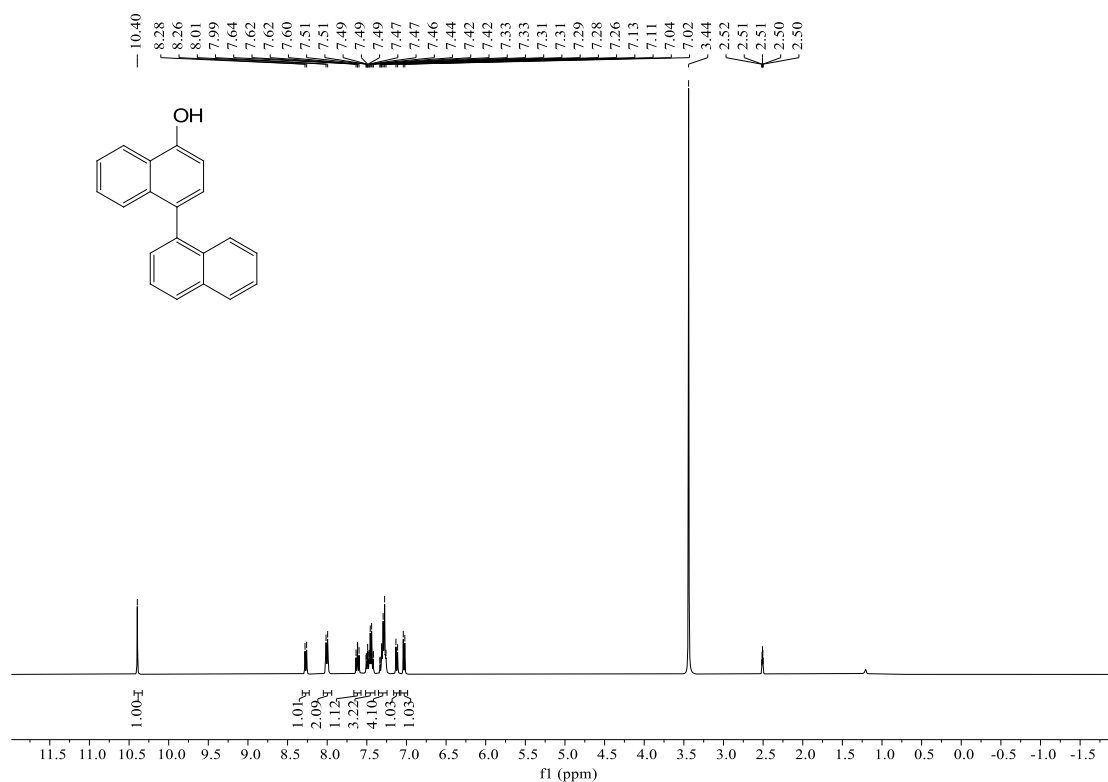

**$^{13}\text{C}$  NMR spectra of 3m (100 MHz, DMSO- $d_6$ )**

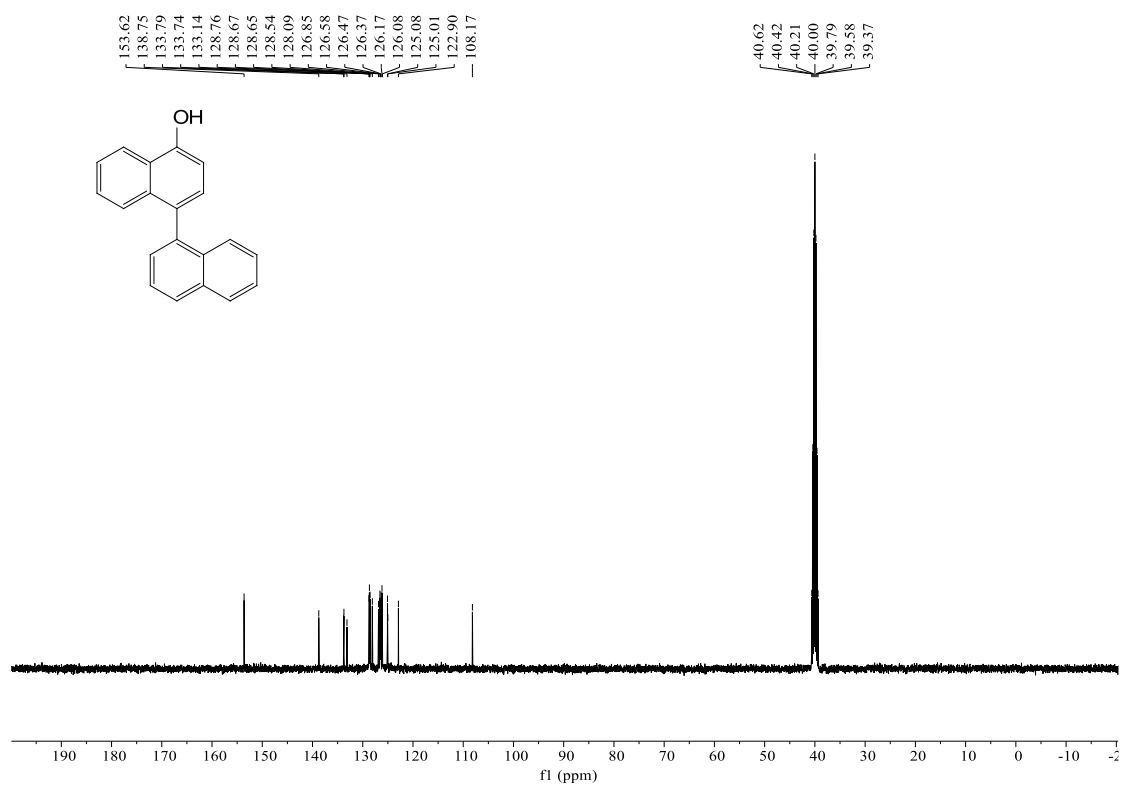

# <sup>1</sup>H NMR spectra of 3n (400 MHz, CDCl<sub>3</sub>)

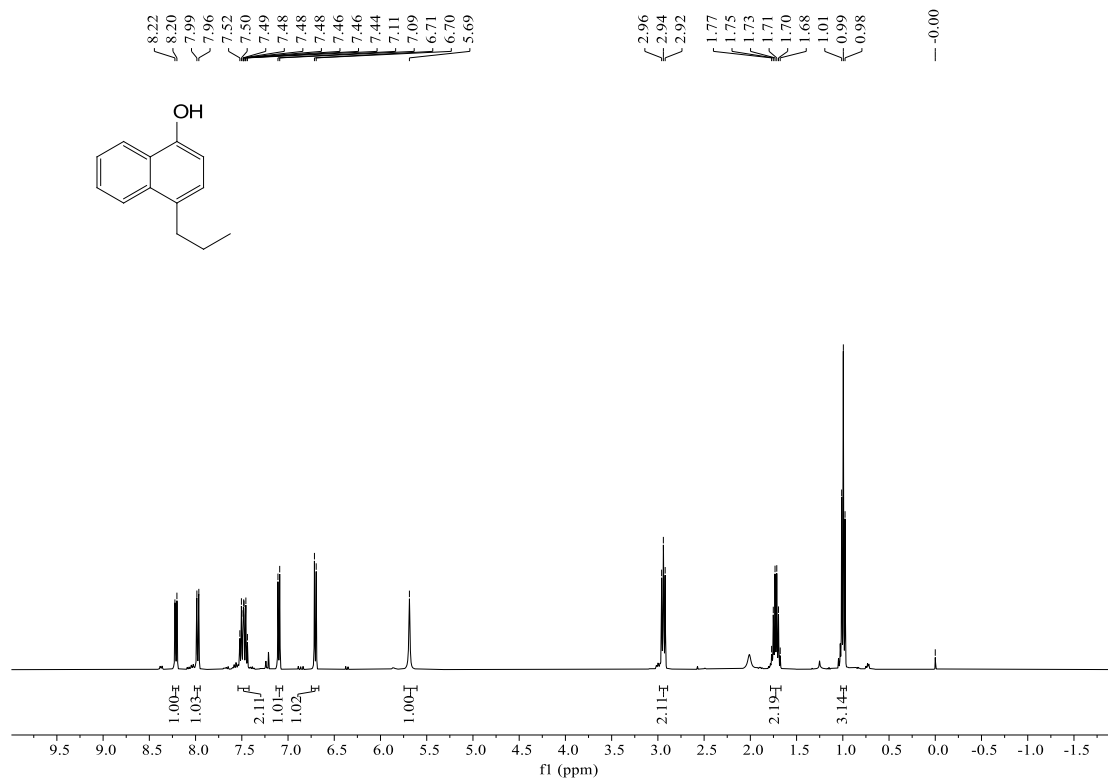

# <sup>13</sup>C NMR spectra of 3n (100 MHz, CDCl<sub>3</sub>)

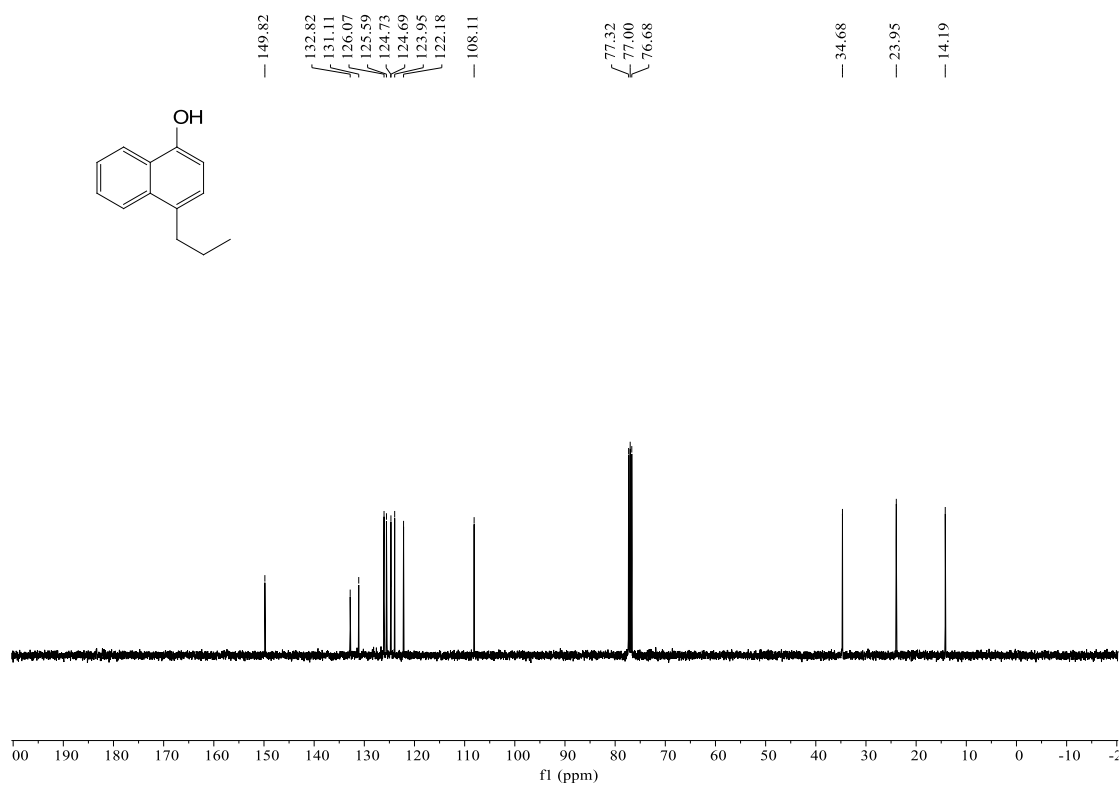

# <sup>1</sup>H NMR spectra of 3o (400 MHz, CDCl<sub>3</sub>)

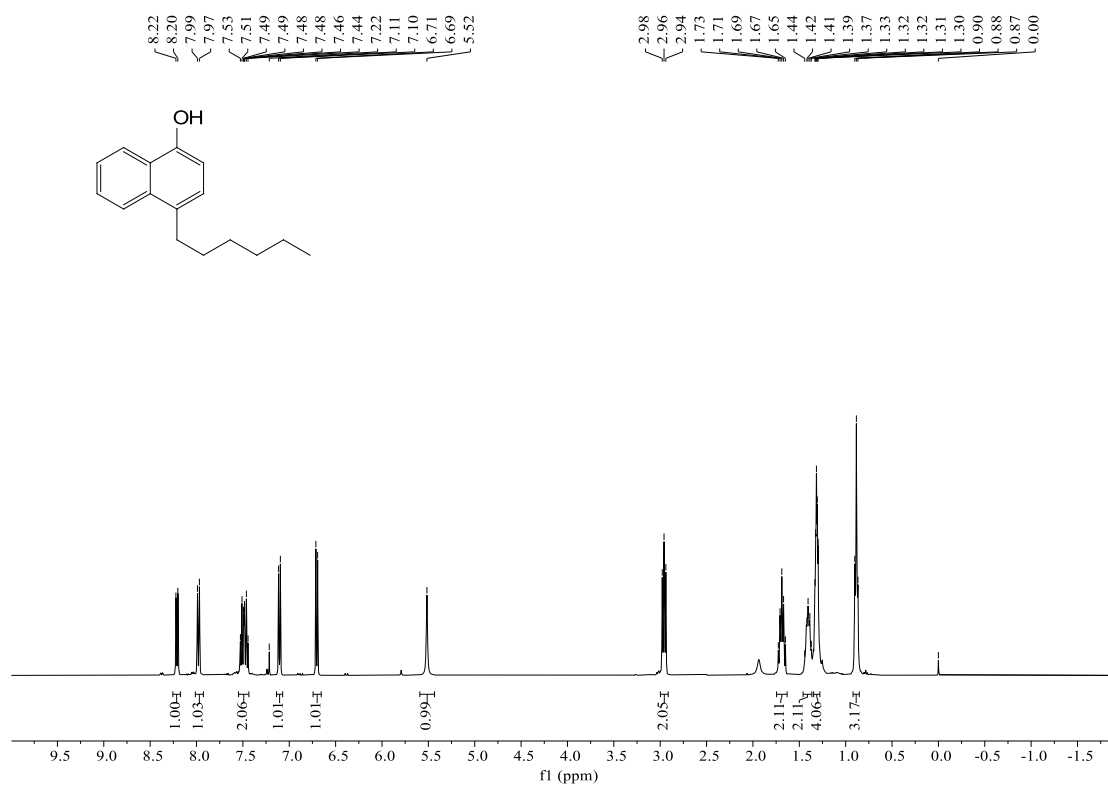

# <sup>13</sup>C NMR spectra of 3o (100 MHz, CDCl<sub>3</sub>)

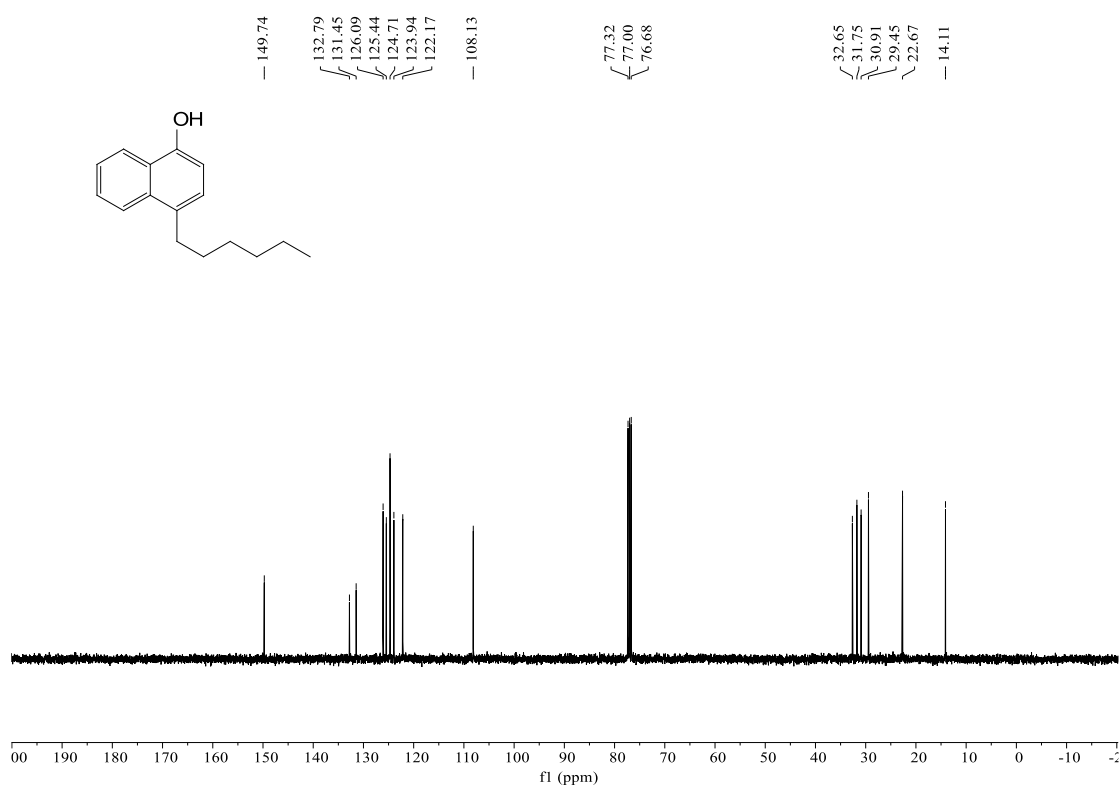

# <sup>1</sup>H NMR spectra of 3p (400 MHz, CDCl<sub>3</sub>)

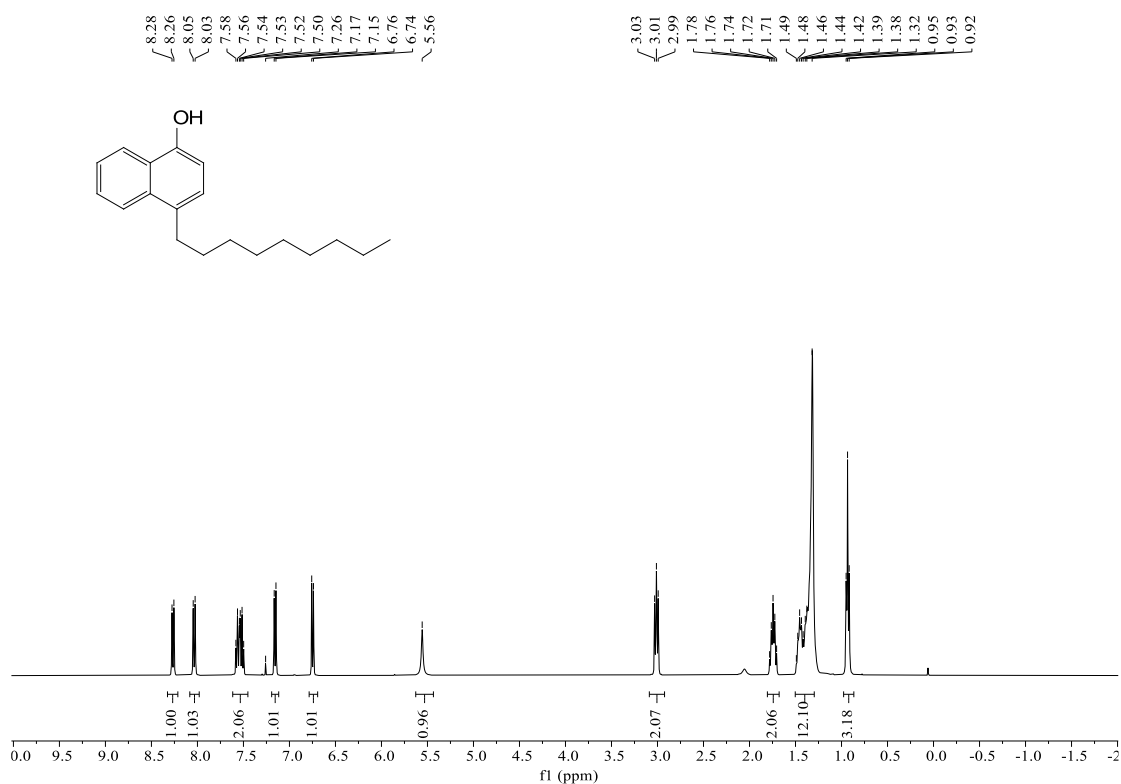

# <sup>13</sup>C NMR spectra of 3p (100 MHz, CDCl<sub>3</sub>)

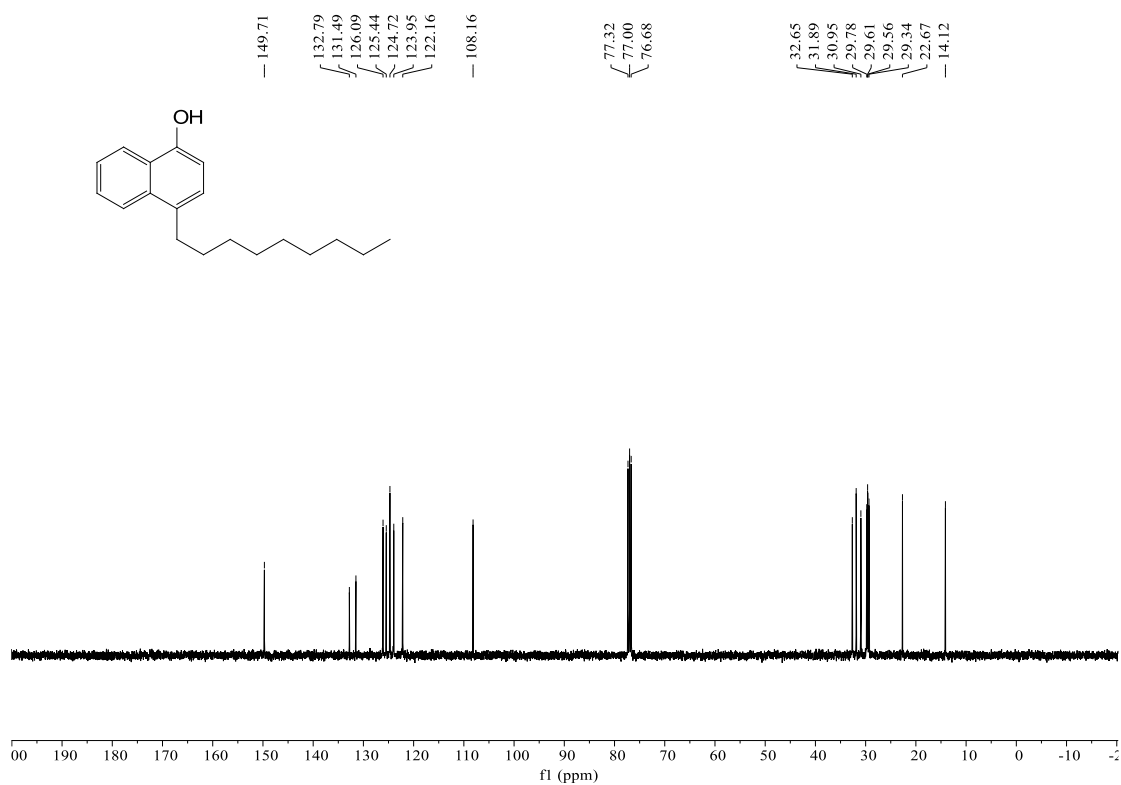

# <sup>1</sup>H NMR spectra of 3q (400 MHz, CDCl<sub>3</sub>)

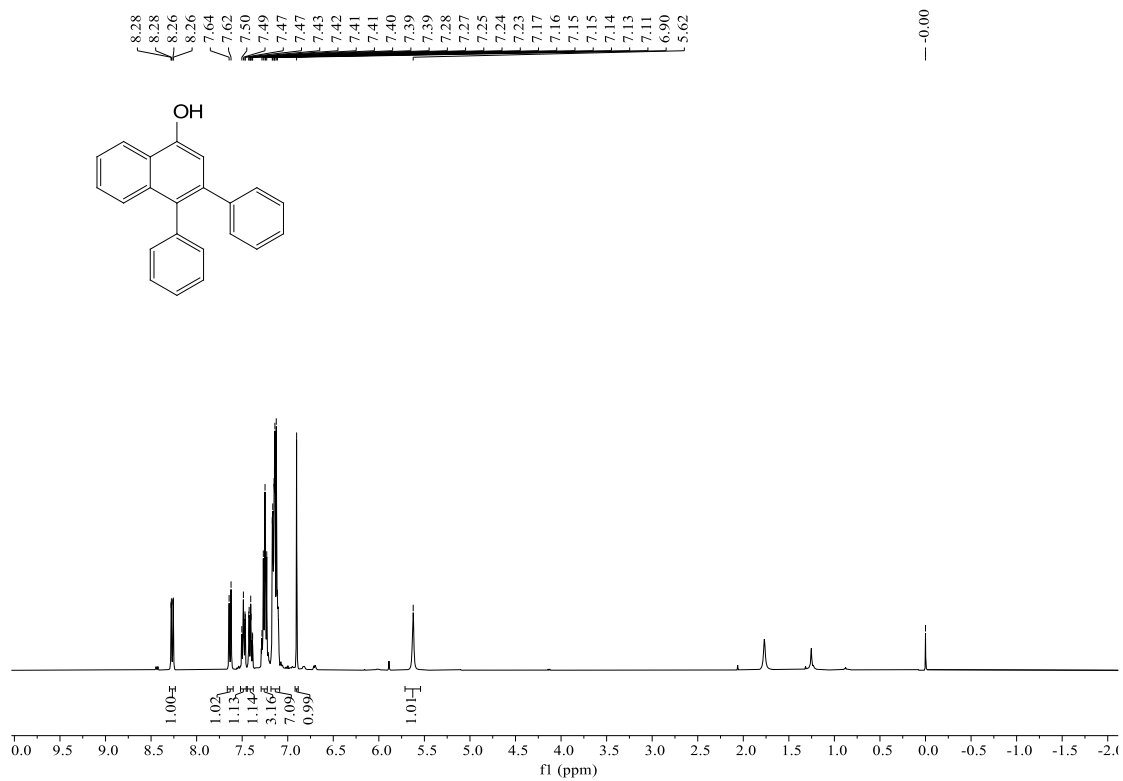

# <sup>13</sup>C NMR spectra of 3q (100 MHz, CDCl<sub>3</sub>)

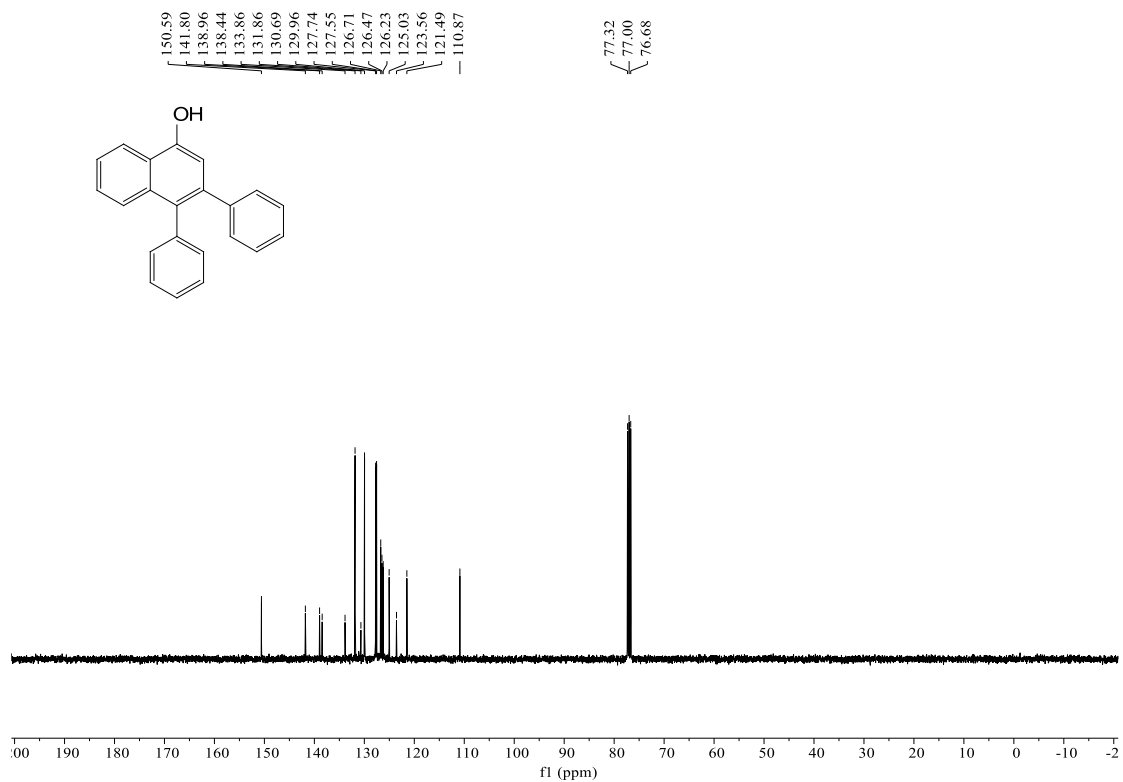

**<sup>1</sup>H NMR spectra of 3r (400 MHz, CDCl<sub>3</sub>)**

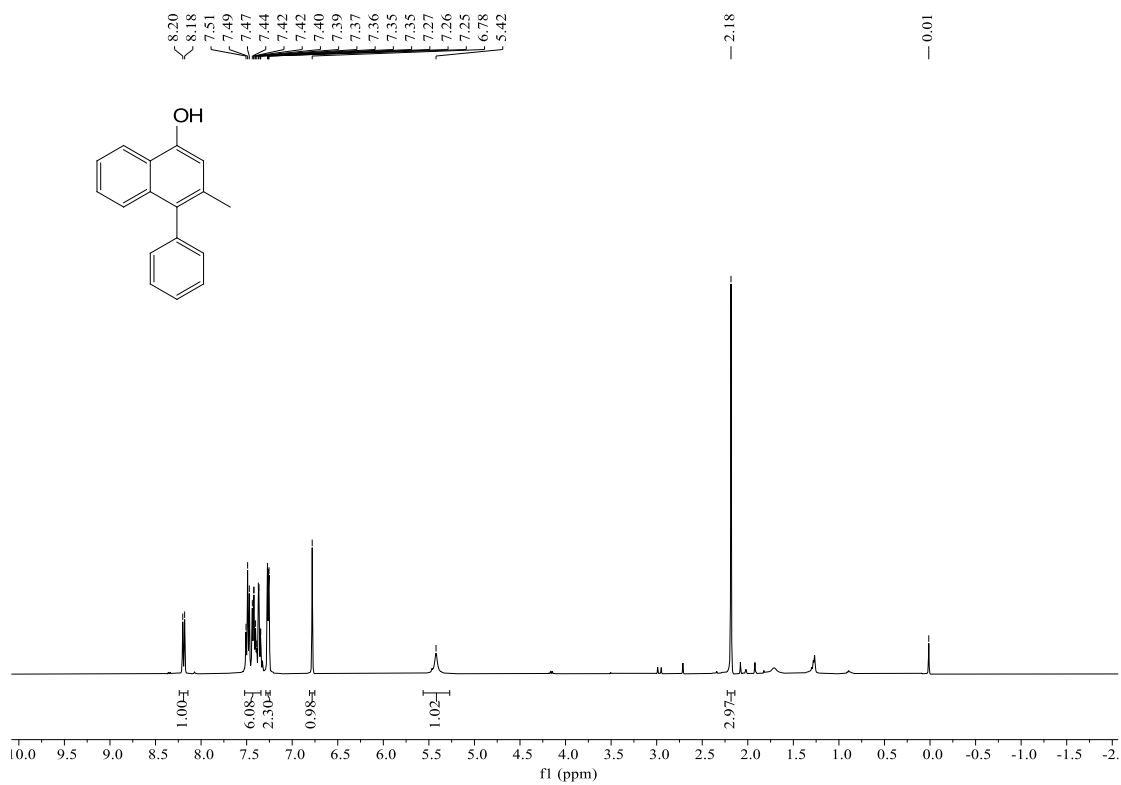

**<sup>13</sup>C NMR spectra of 3r (100 MHz, CDCl<sub>3</sub>)**

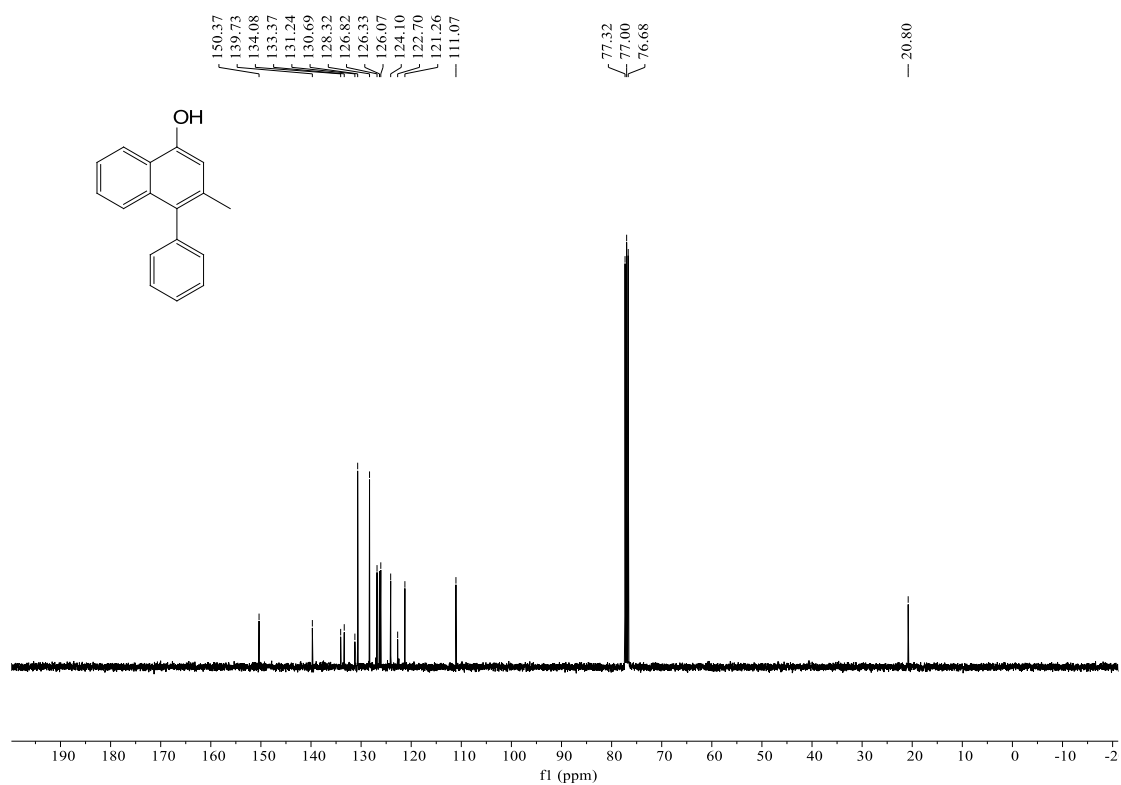

**<sup>1</sup>H NMR spectra of 3t (400 MHz, CDCl<sub>3</sub>)**

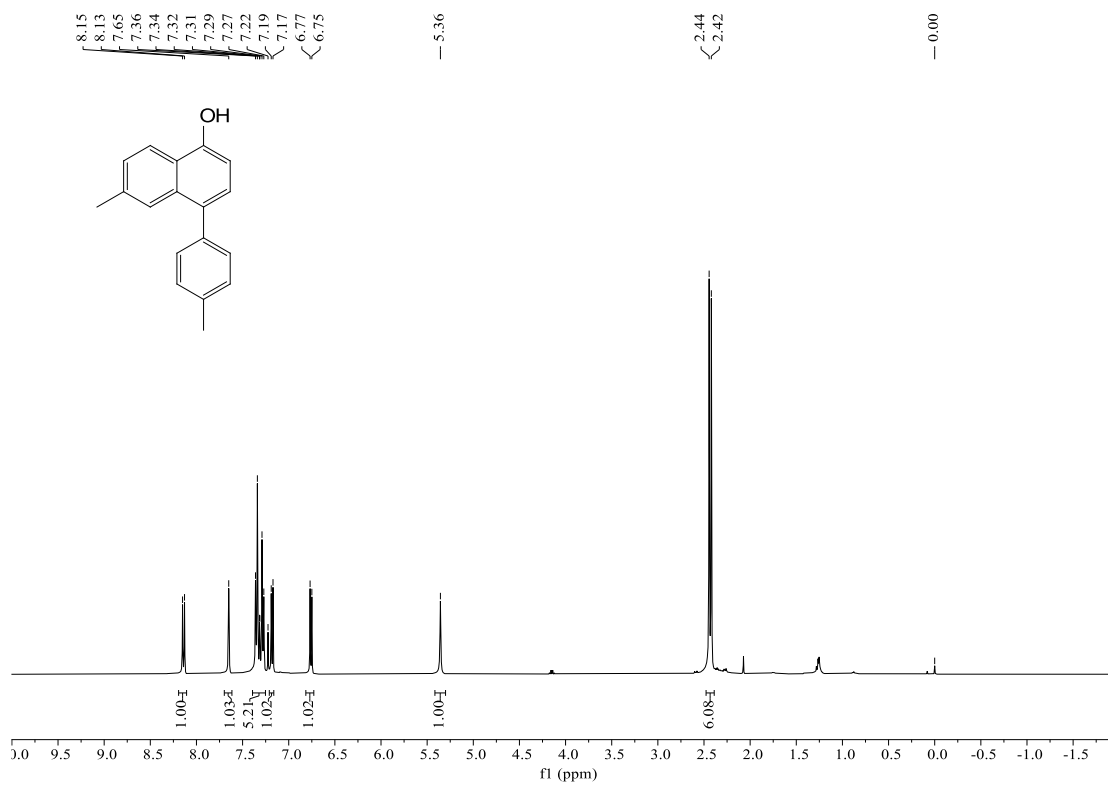

**<sup>13</sup>C NMR spectra of 3t (100 MHz, CDCl<sub>3</sub>)**

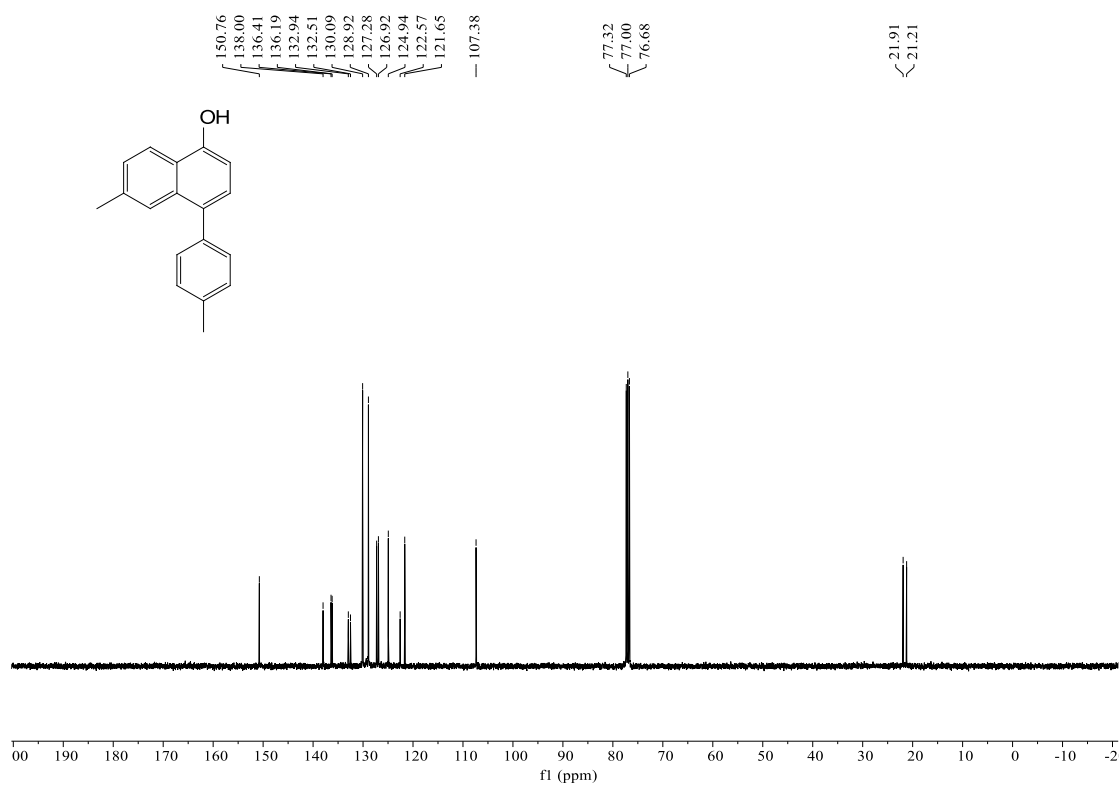

# <sup>1</sup>H NMR spectra of 3u (400 MHz, CDCl<sub>3</sub>)

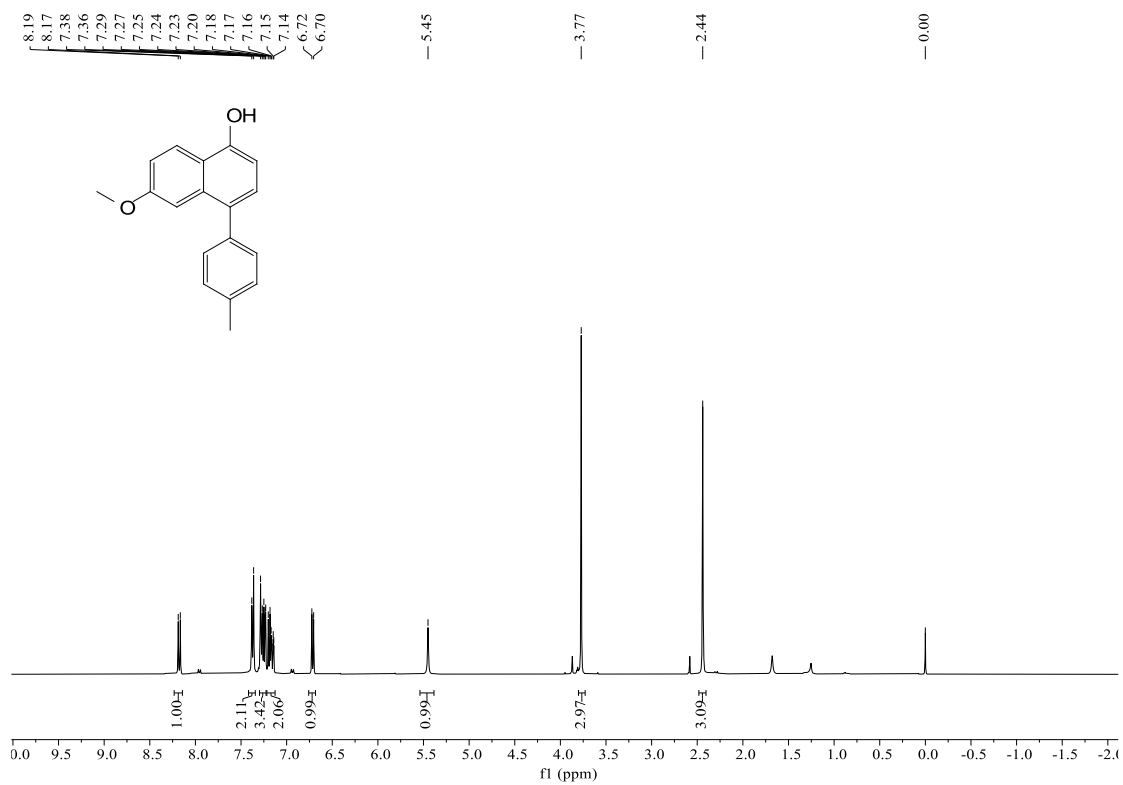

# <sup>13</sup>C NMR spectra of 3u (100 MHz, CDCl<sub>3</sub>)

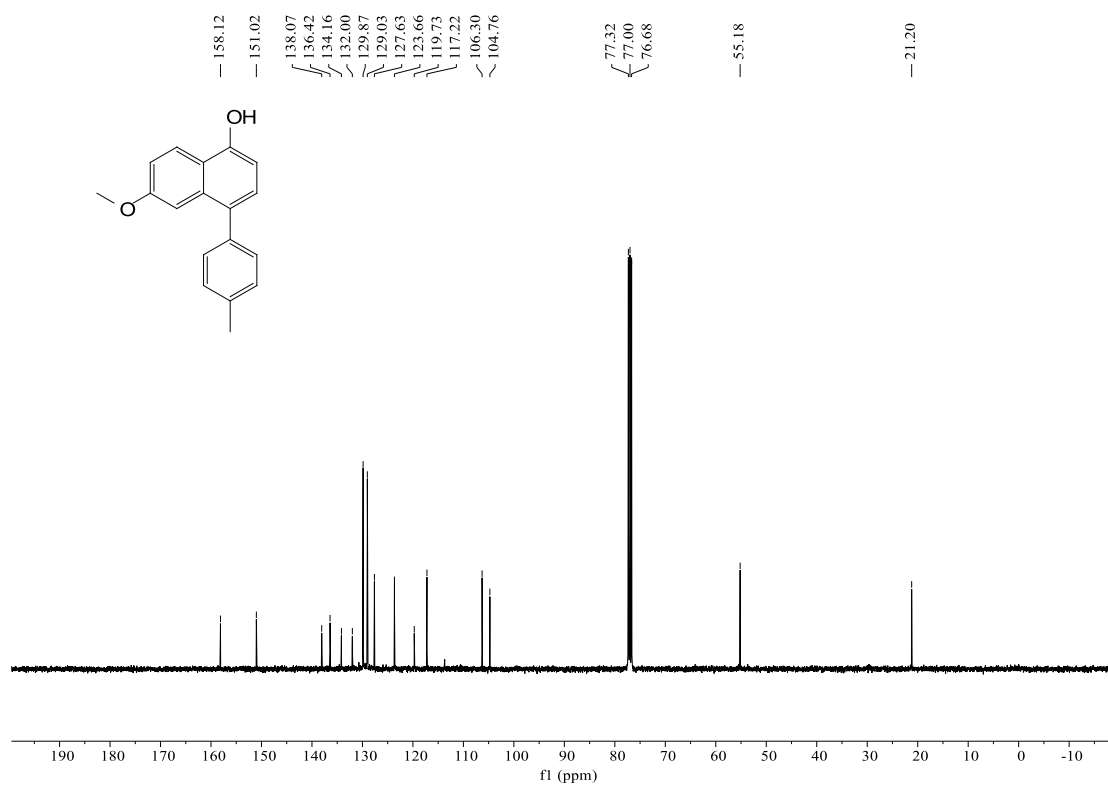



**<sup>1</sup>H NMR spectra of 3v (400 MHz, CDCl<sub>3</sub>)**

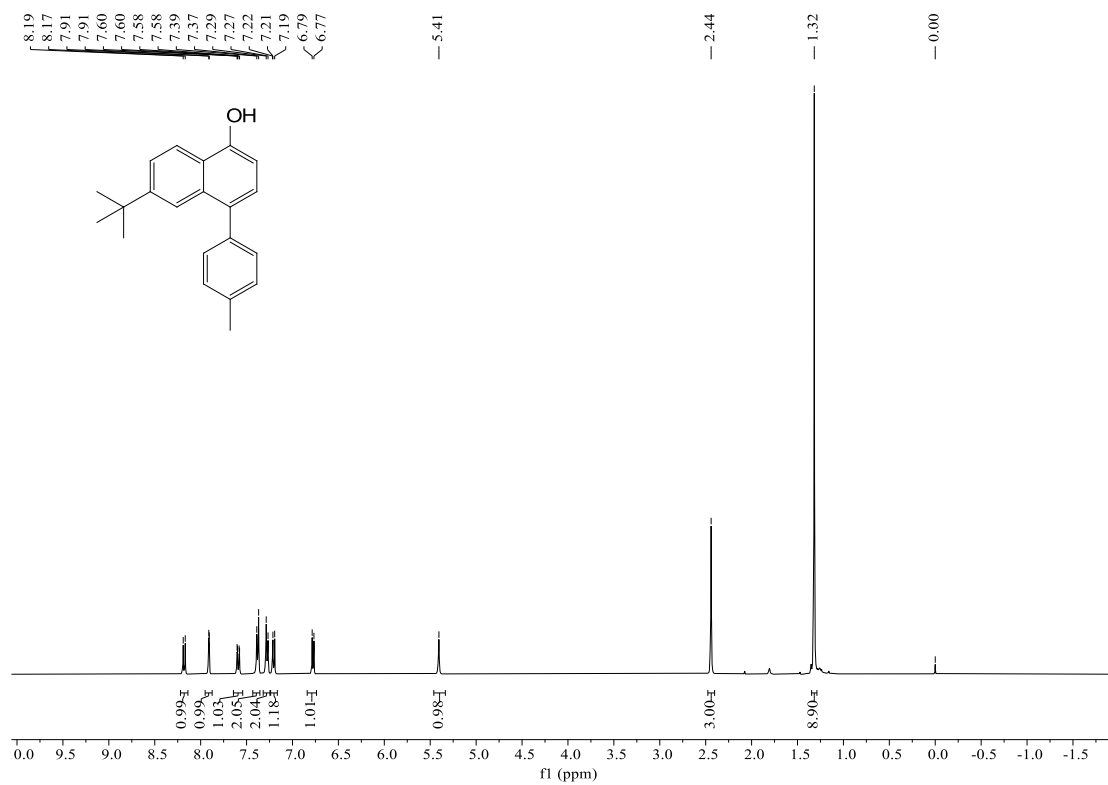

**<sup>13</sup>C NMR spectra of 3v (100 MHz, CDCl<sub>3</sub>)**

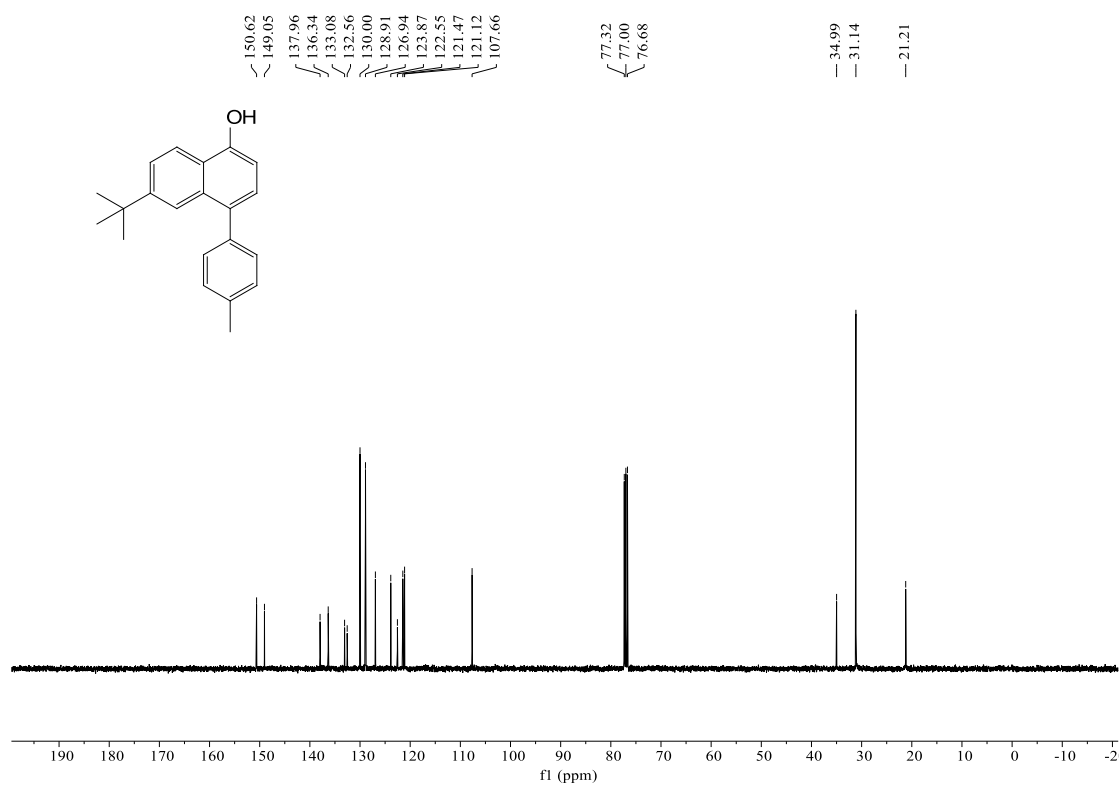

**$^1\text{H}$  NMR spectra of 3w (400 MHz,  $\text{CDCl}_3$ )**

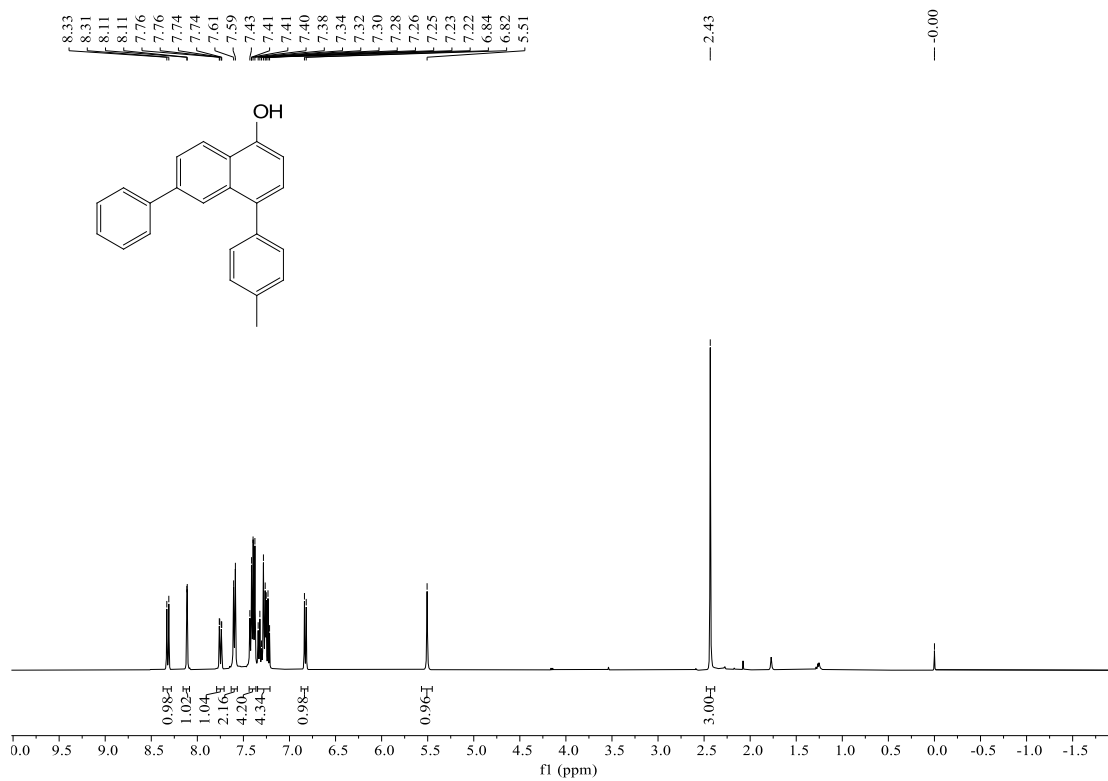

**$^{13}\text{C}$  NMR spectra of 3w (100 MHz,  $\text{CDCl}_3$ )**

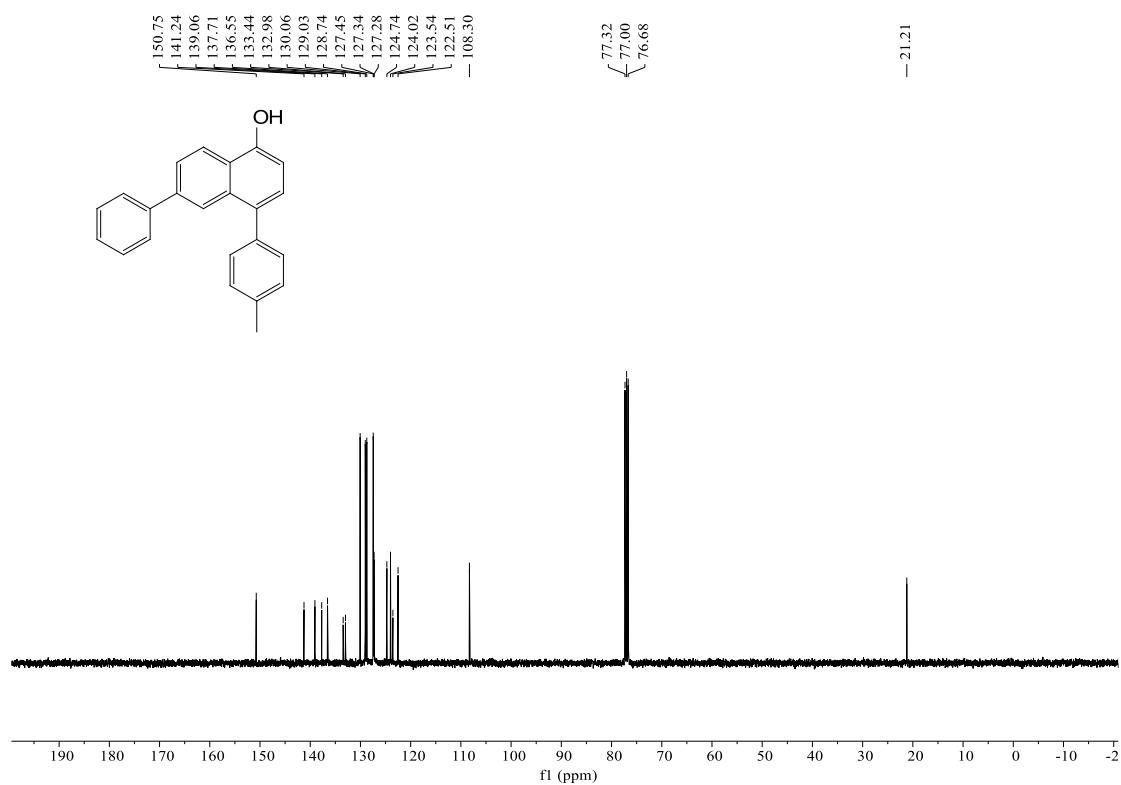

# <sup>1</sup>H NMR spectra of 3x (400 MHz, DMSO-*d*<sub>6</sub>)

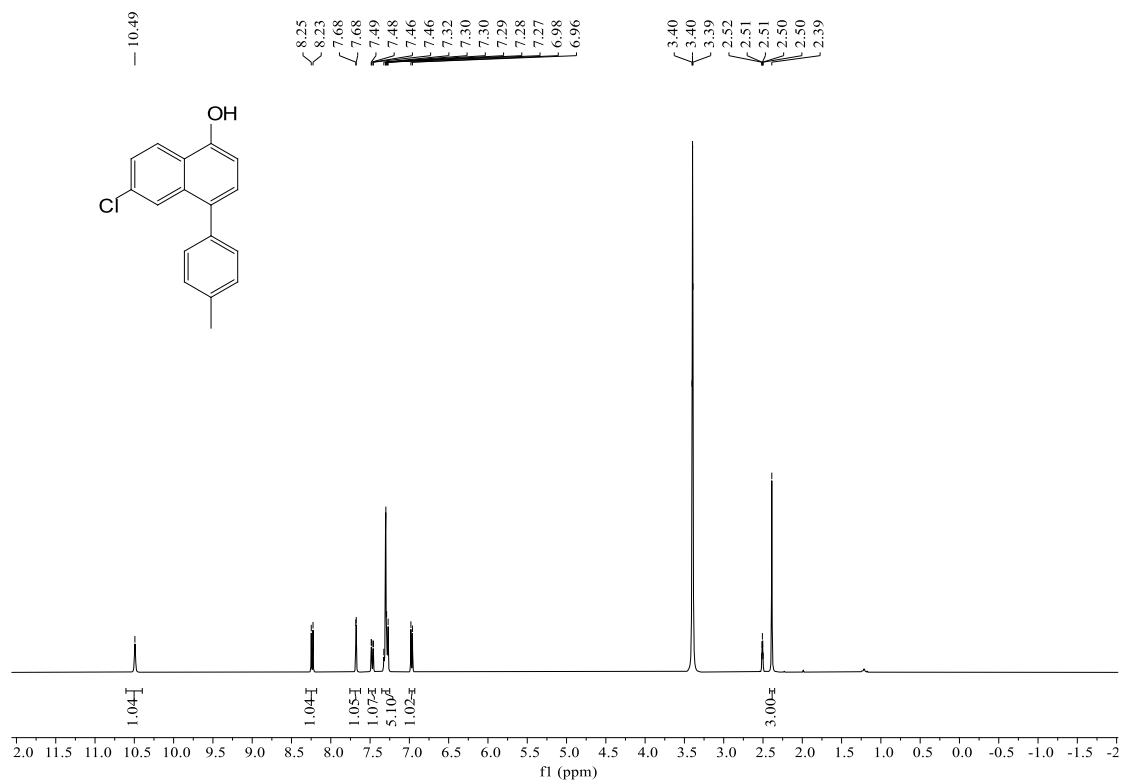

# <sup>13</sup>C NMR spectra of 3x (100 MHz, DMSO-*d*<sub>6</sub>)

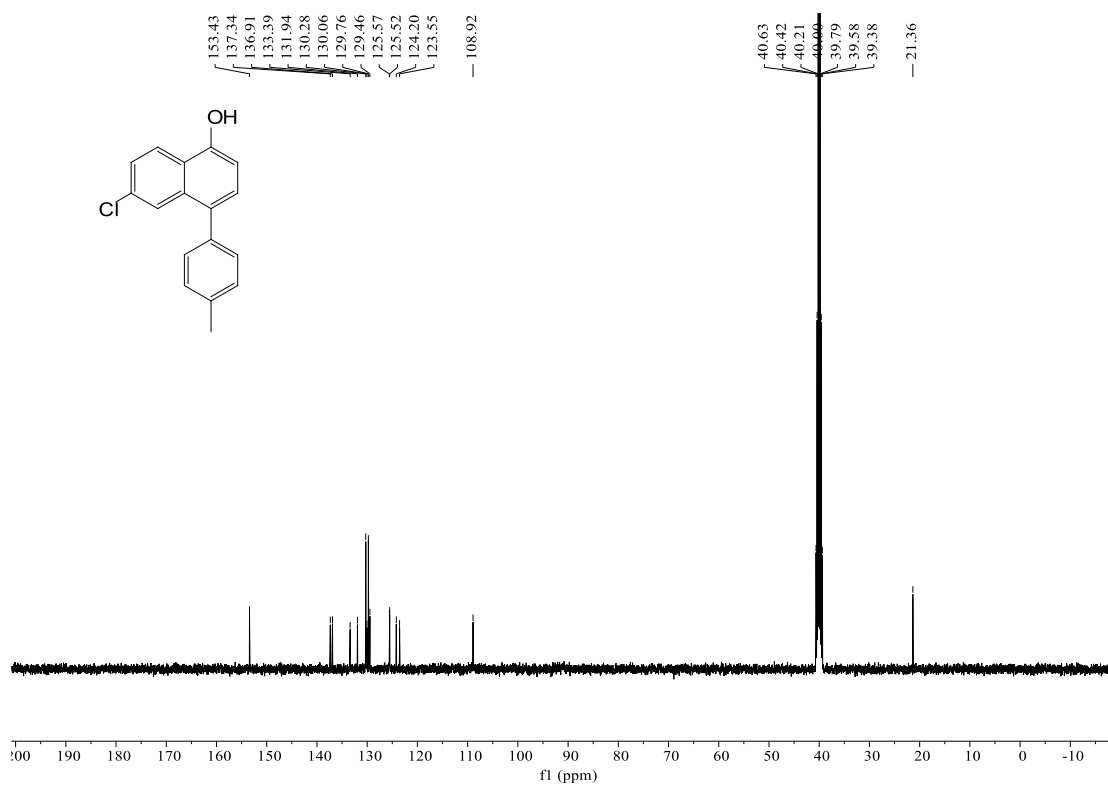

**<sup>1</sup>H NMR spectra of 3y (400 MHz, CDCl<sub>3</sub>)**

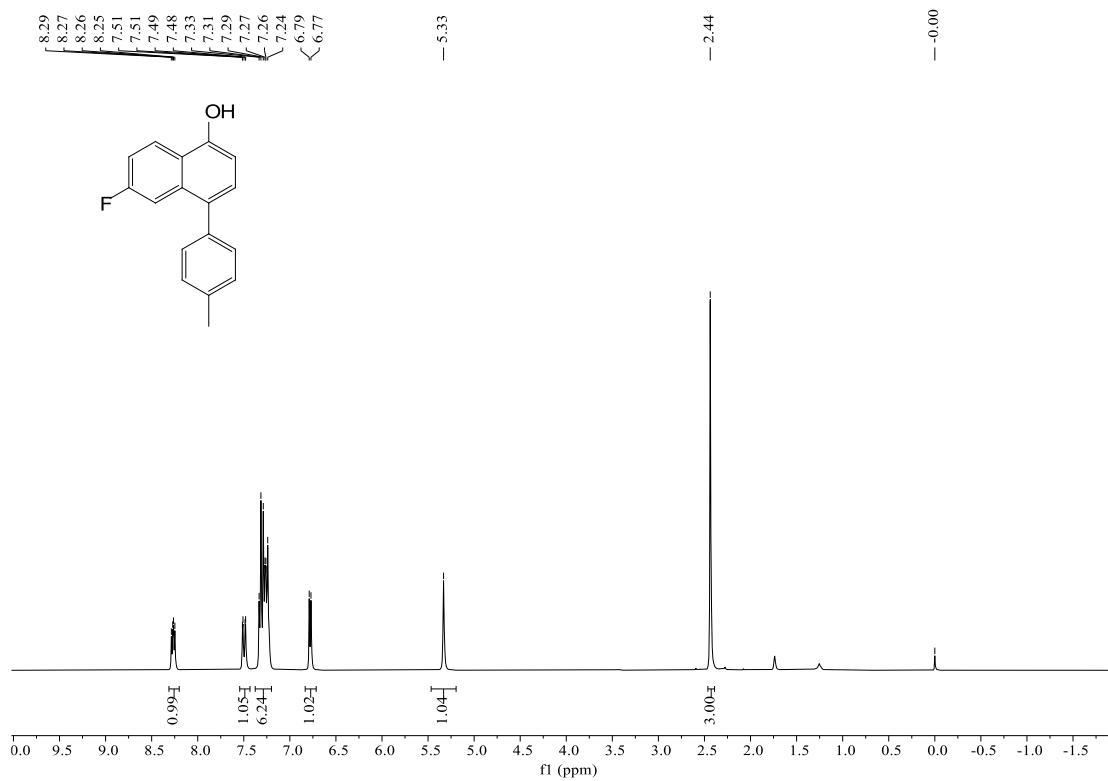

**<sup>13</sup>C NMR spectra of 3y (100 MHz, CDCl<sub>3</sub>)**

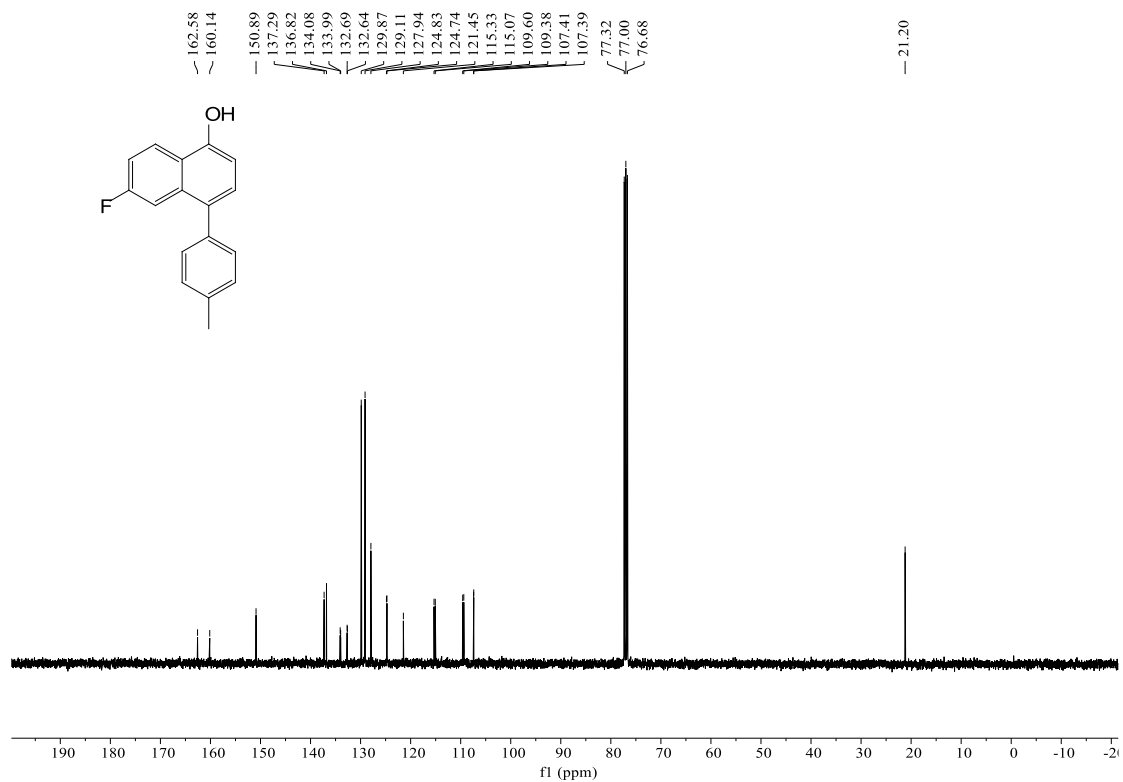

**$^{19}\text{F}$  NMR spectra of 3y (376 MHz,  $\text{CDCl}_3$ )**

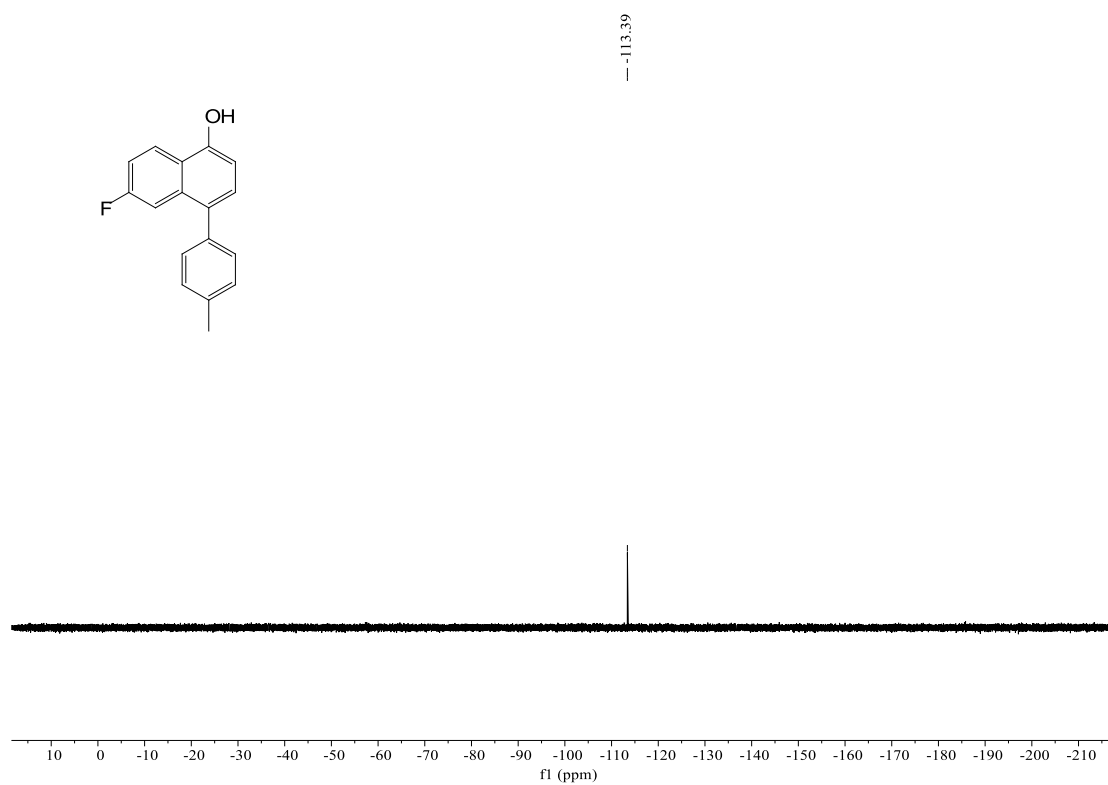

**$^1\text{H}$  NMR spectra of 3z (400 MHz,  $\text{DMSO}-d_6$ )**

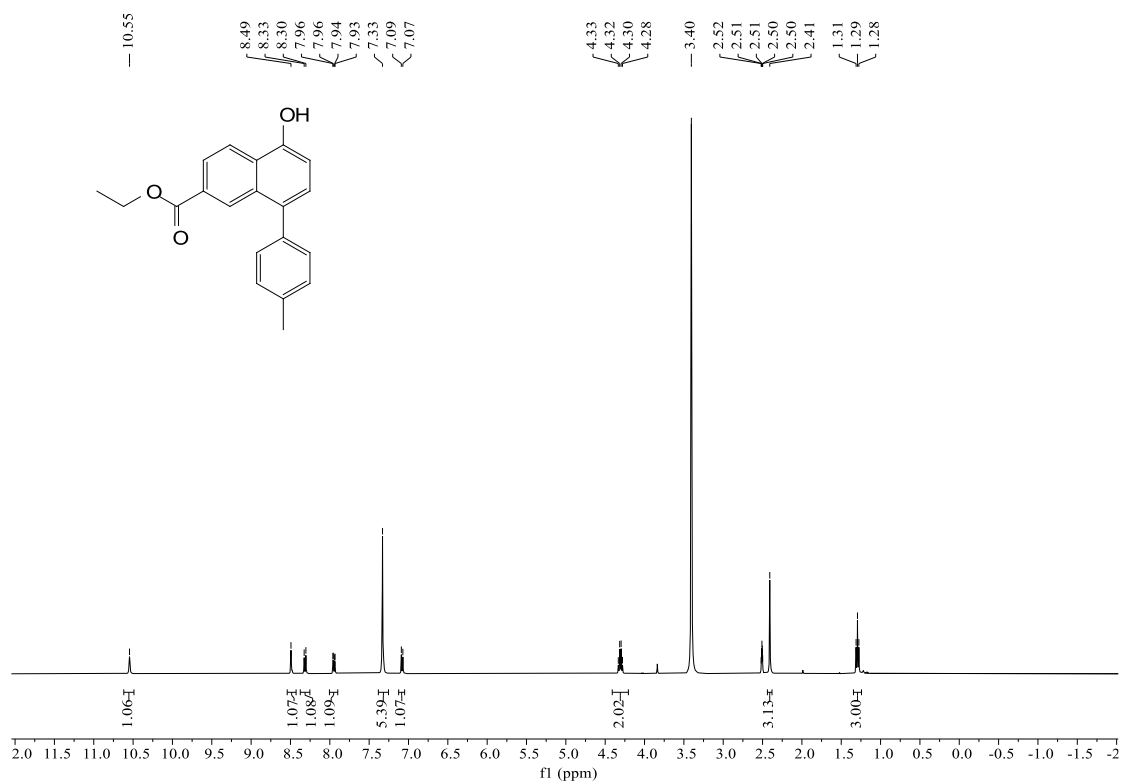

**$^{13}\text{C}$  NMR spectra of 3z (100 MHz, DMSO- $d_6$ )**

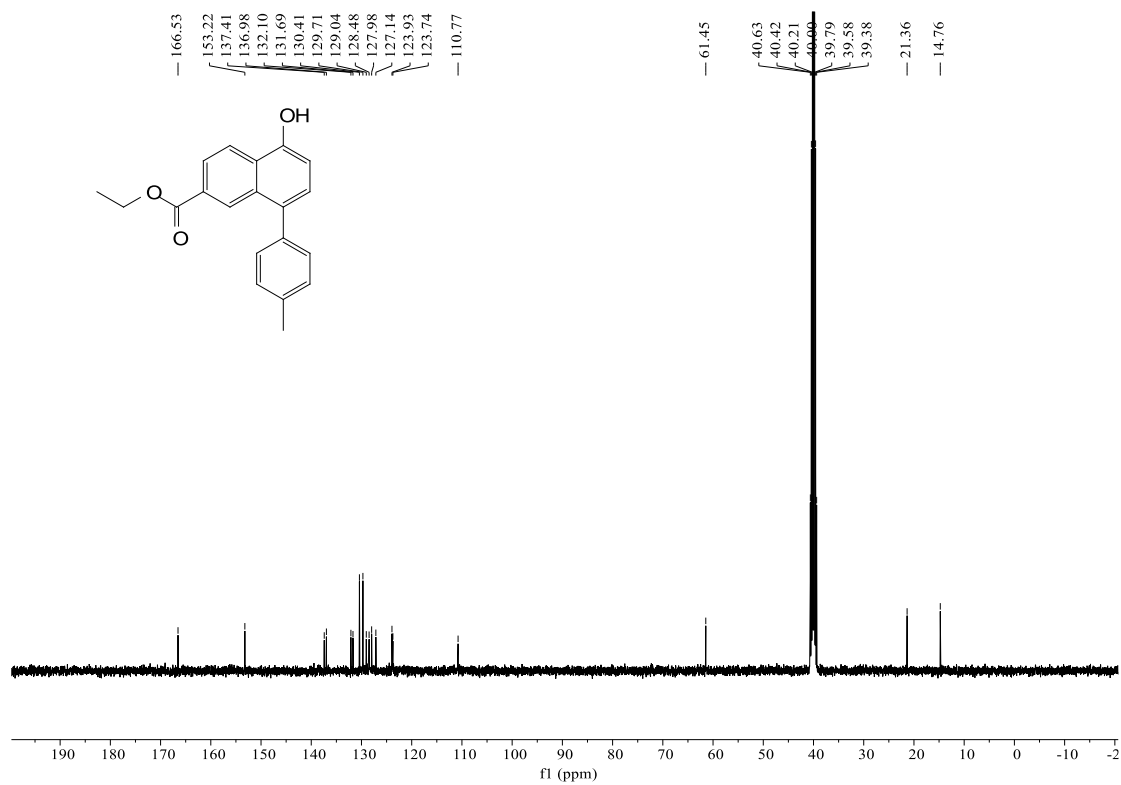

**$^1\text{H}$  NMR spectra of 3aa + 3aa' (400 MHz,  $\text{CDCl}_3$ )**

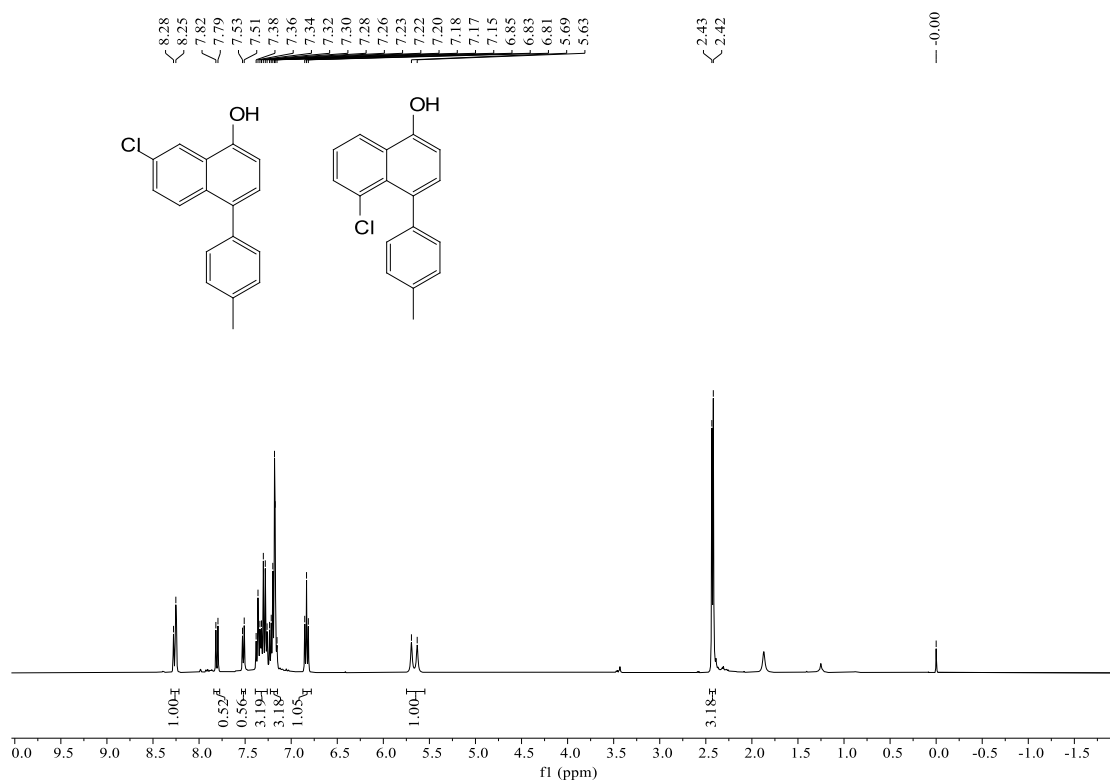

**$^{13}\text{C}$  NMR spectra of 3aa + 3aa' (100 MHz,  $\text{CDCl}_3$ )**

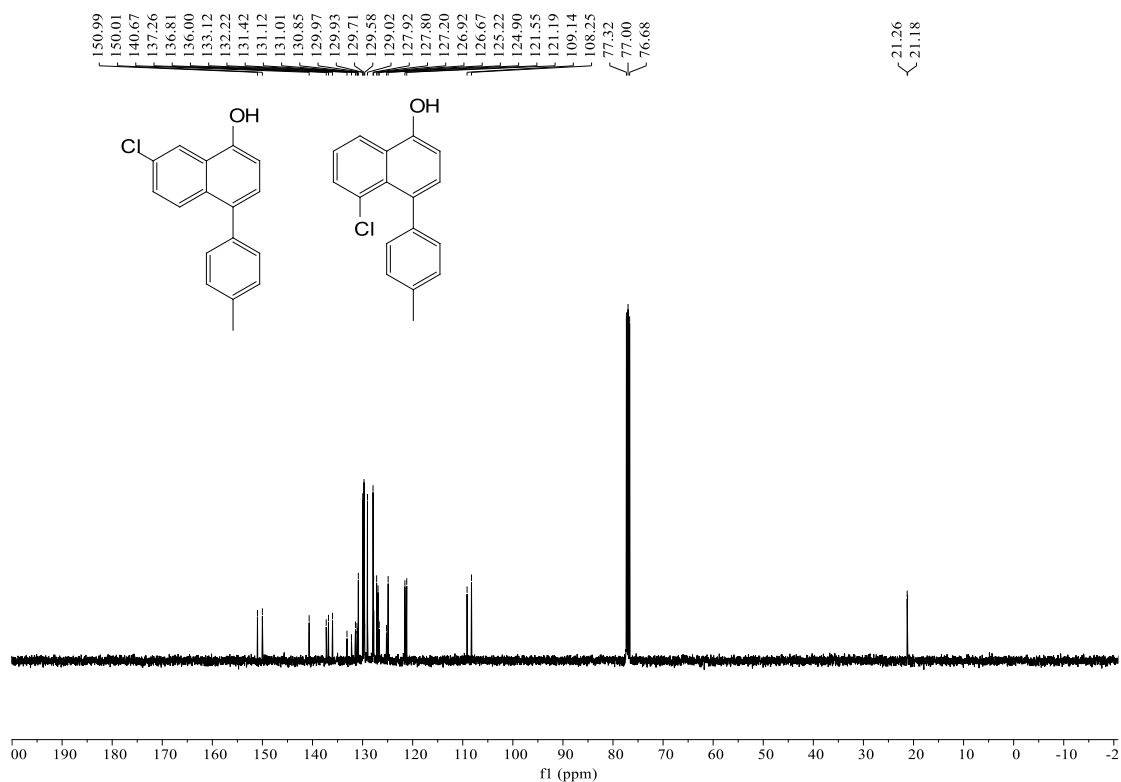

**$^1\text{H}$  NMR spectra of 3ab (400 MHz,  $\text{CDCl}_3$ )**

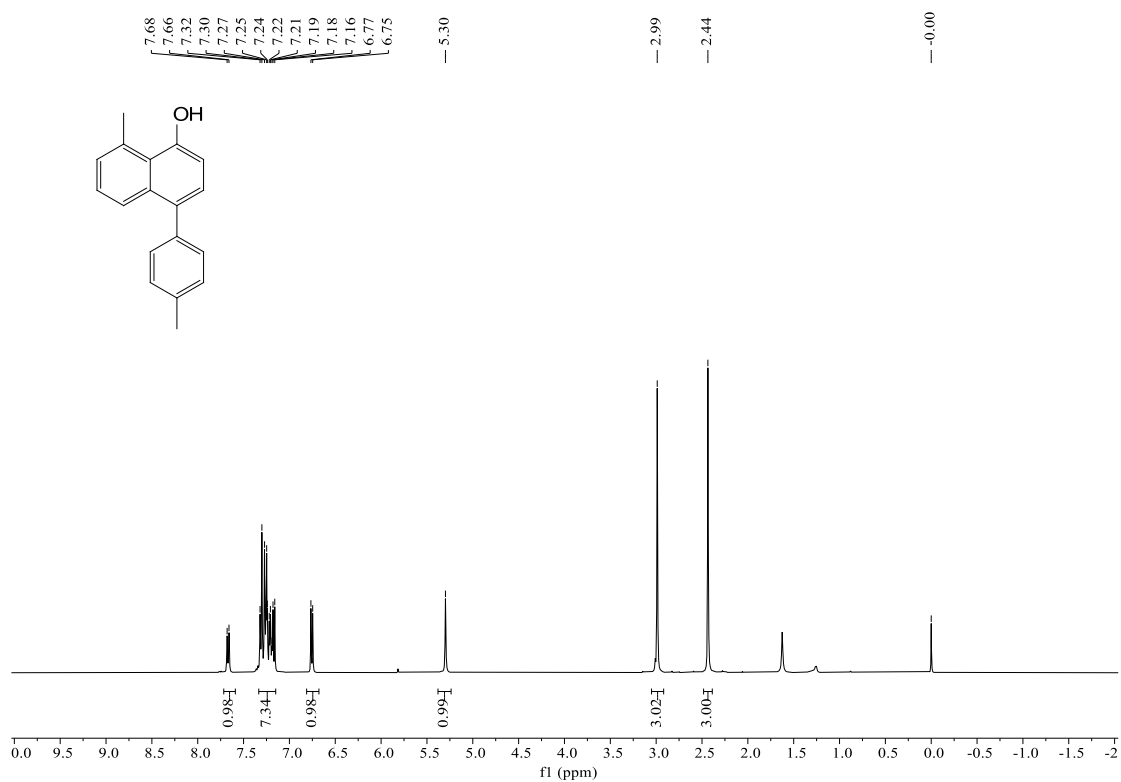

### <sup>13</sup>C NMR spectra of 3ab (100 MHz, CDCl<sub>3</sub>)

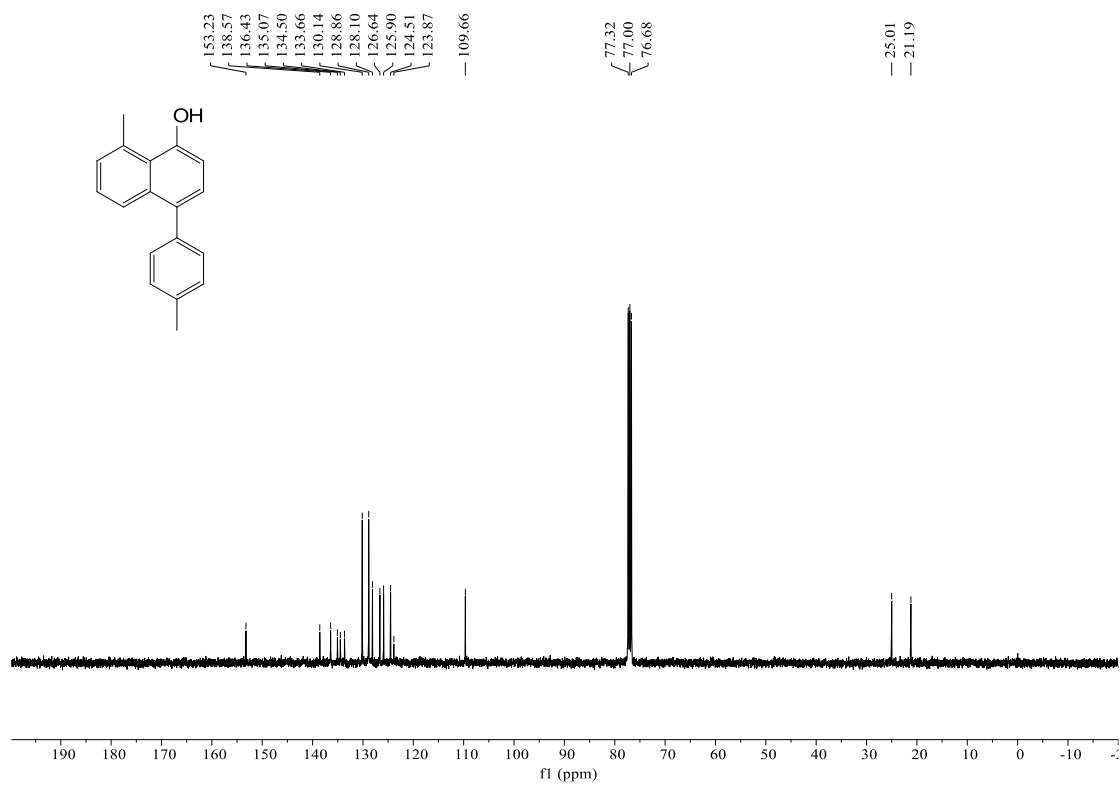

### <sup>1</sup>H NMR spectra of 3ac (400 MHz, CDCl<sub>3</sub>)

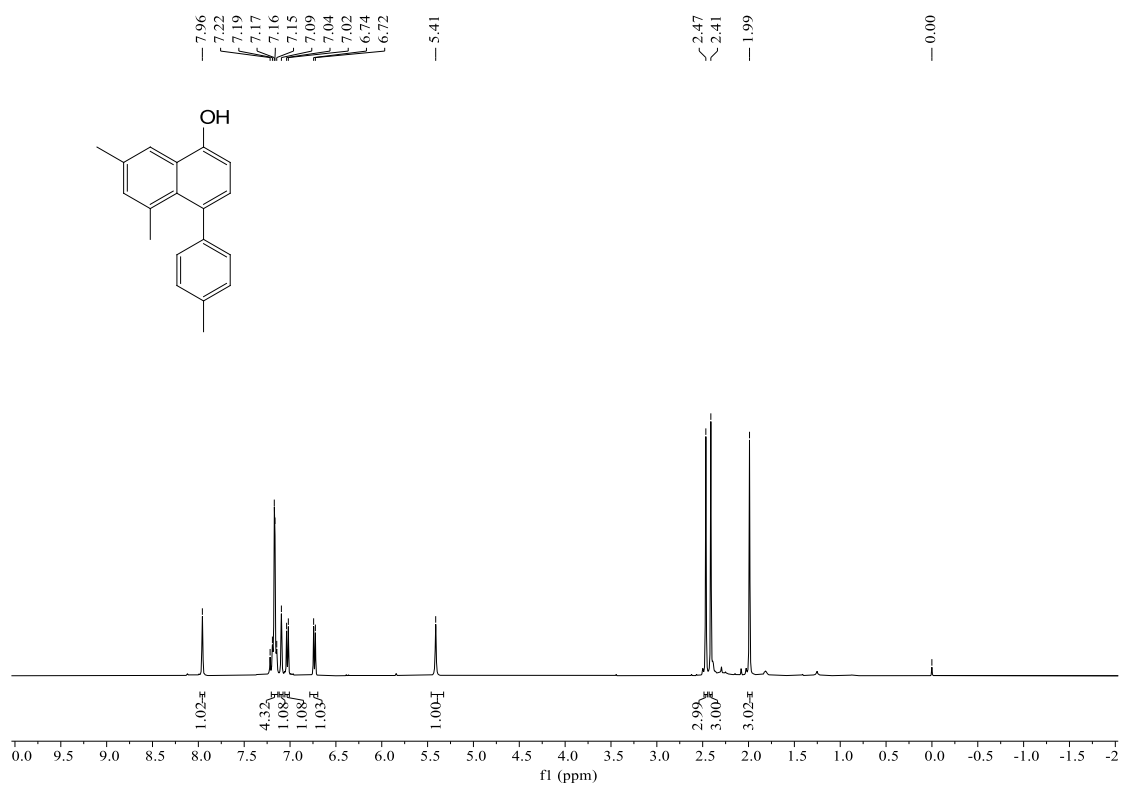



**$^{13}\text{C}$  NMR spectra of 3ac (100 MHz,  $\text{CDCl}_3$ )**

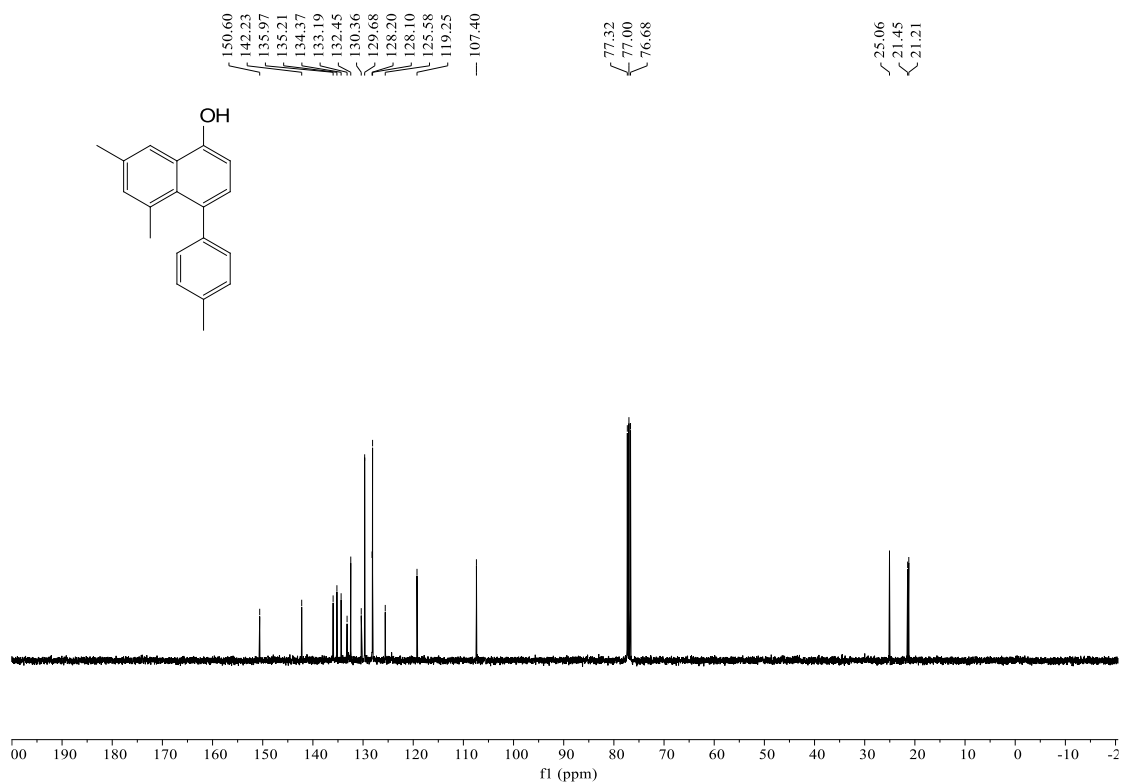

**$^1\text{H}$  NMR spectra of 3ad (400 MHz,  $\text{CDCl}_3$ )**

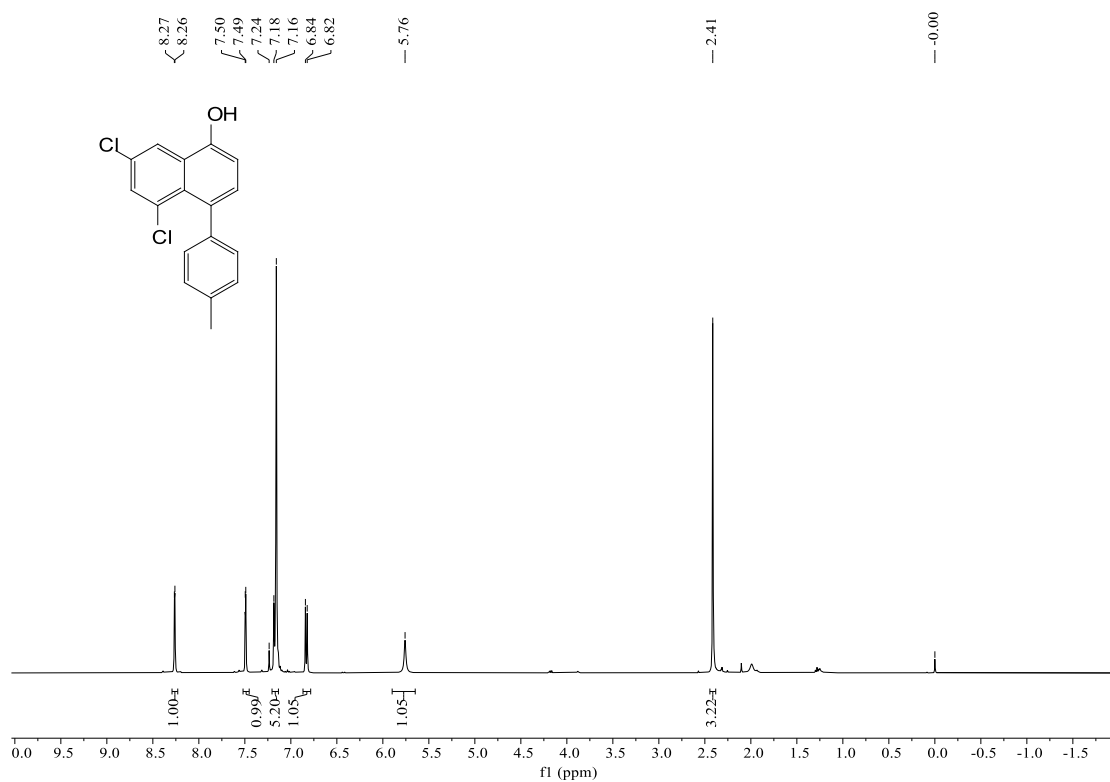

**$^{13}\text{C}$  NMR spectra of 3ad (100 MHz,  $\text{CDCl}_3$ )**

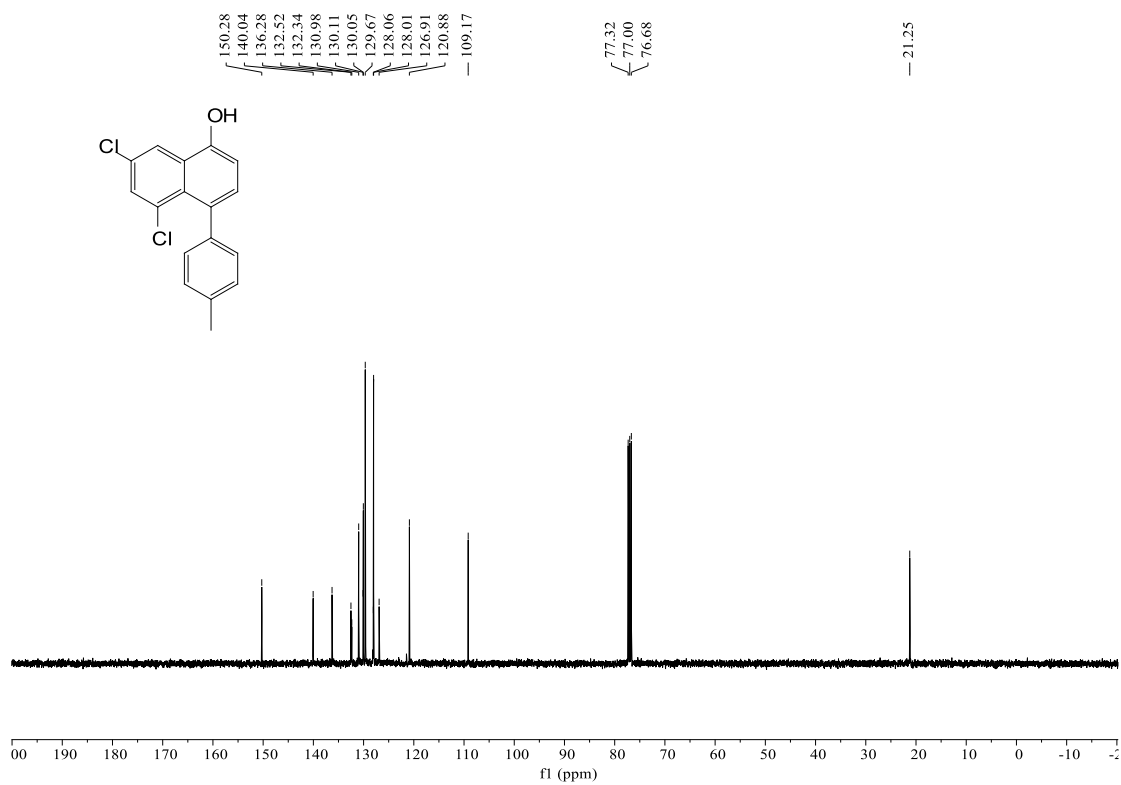

**$^1\text{H}$  NMR spectra of 3ae (400 MHz,  $\text{CDCl}_3$ )**

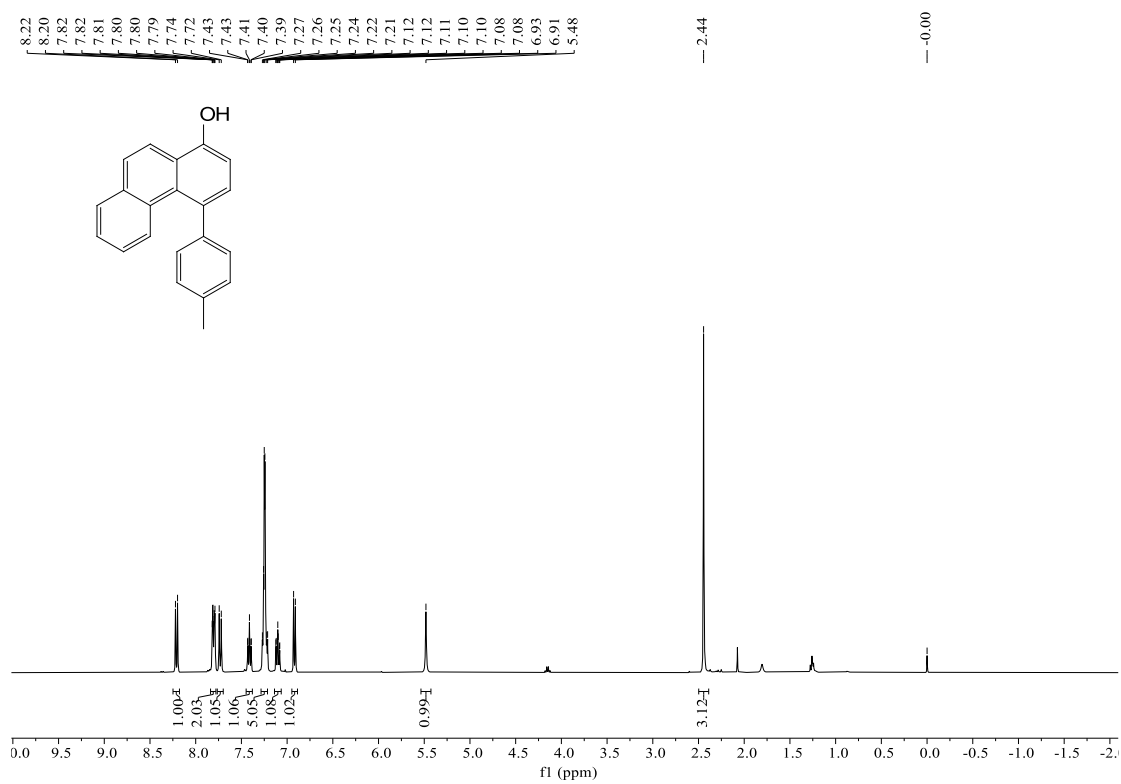

### <sup>13</sup>C NMR spectra of 3ae (100 MHz, CDCl<sub>3</sub>)

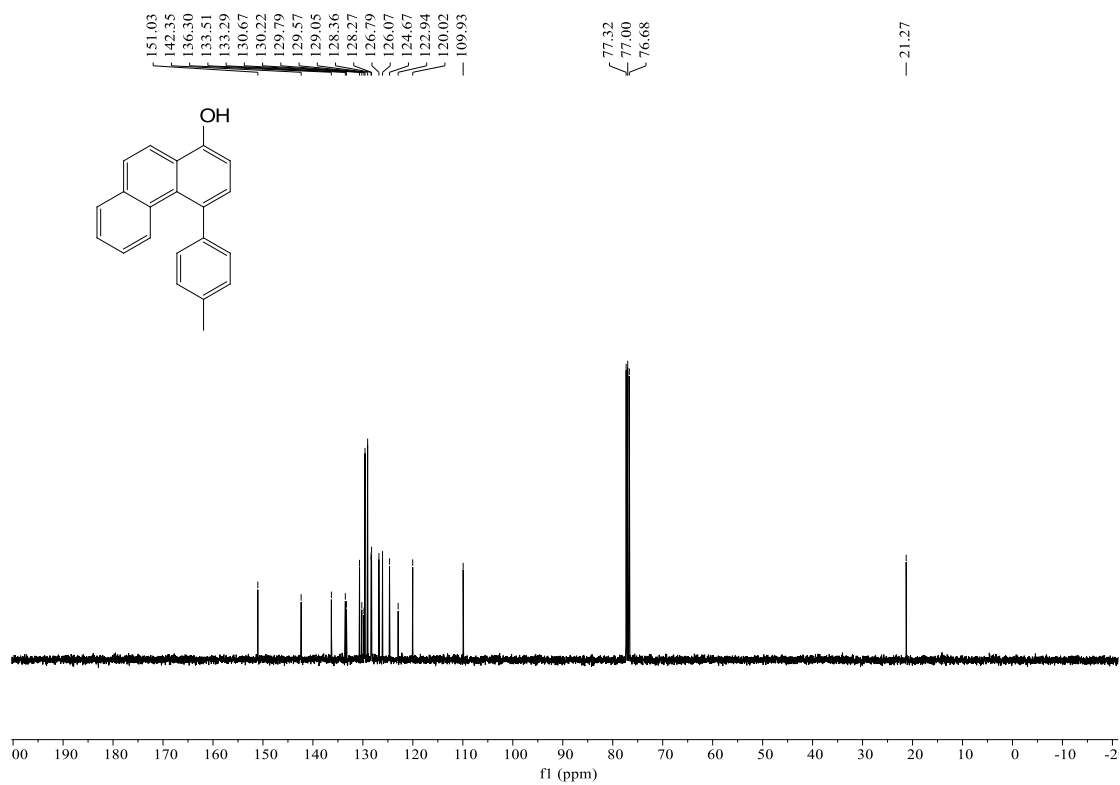

### <sup>1</sup>H NMR spectra of 3af (400 MHz, CDCl<sub>3</sub>)

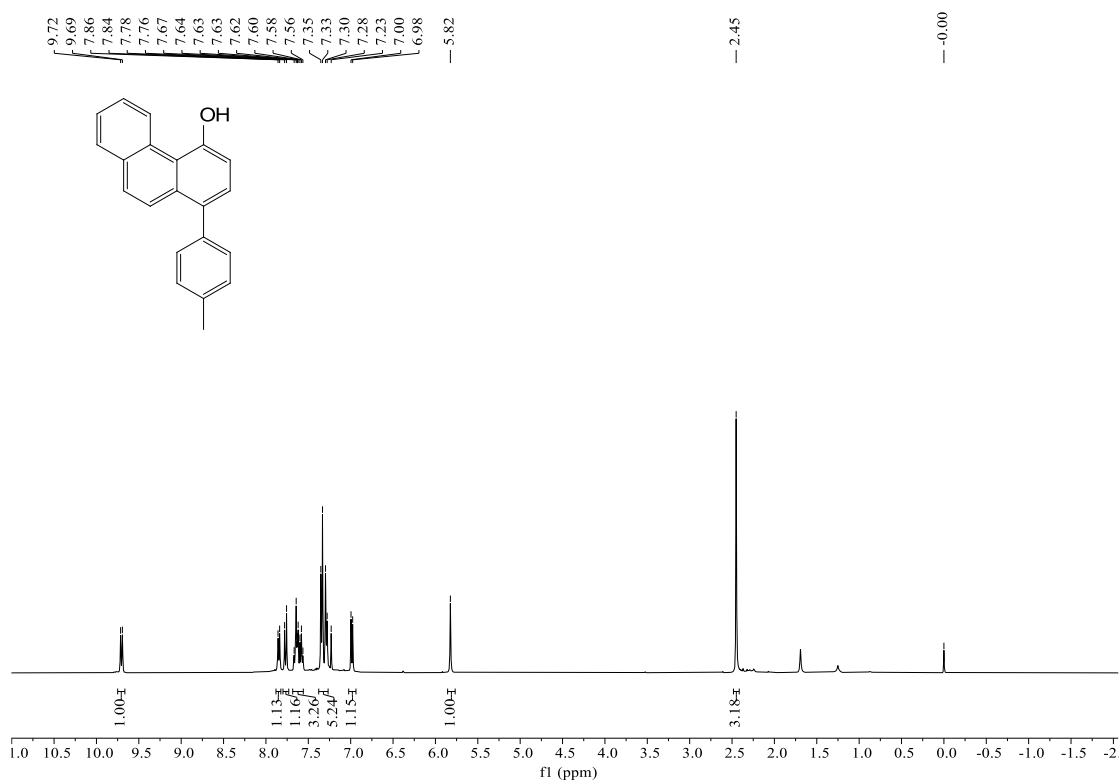

**$^{13}\text{C}$  NMR spectra of 3af (100 MHz,  $\text{CDCl}_3$ )**

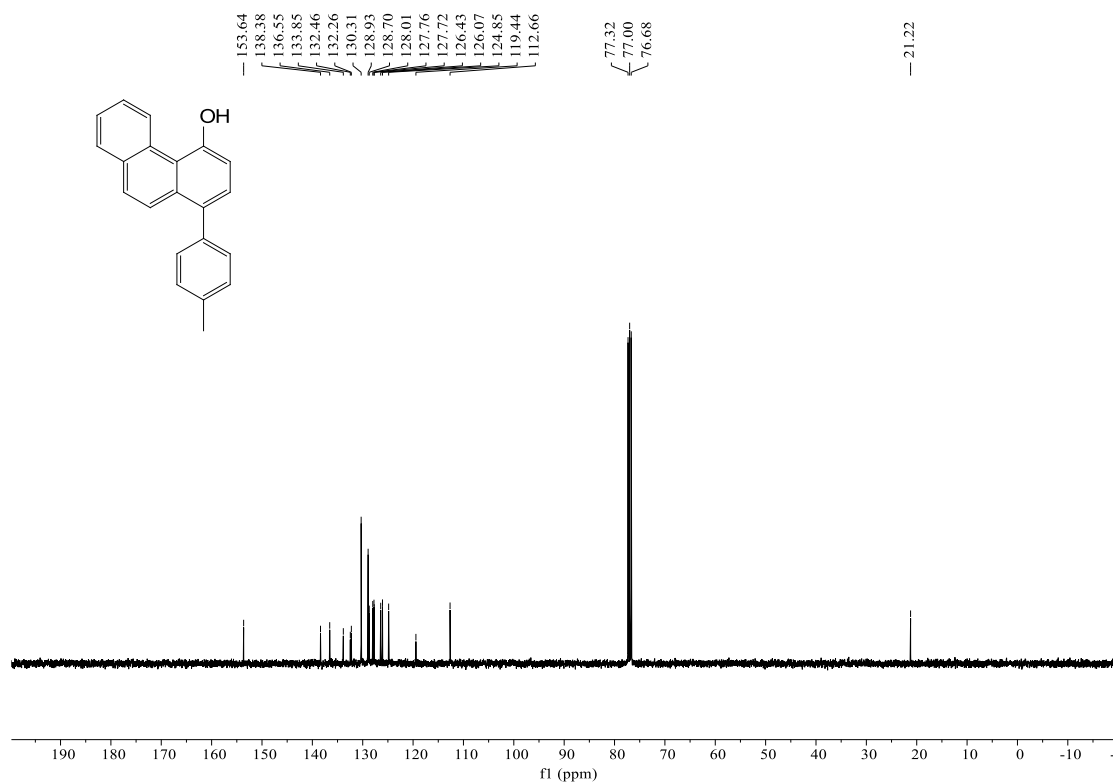

**$^1\text{H}$  NMR spectra of 3ag (400 MHz,  $\text{DMSO}-d_6$ )**

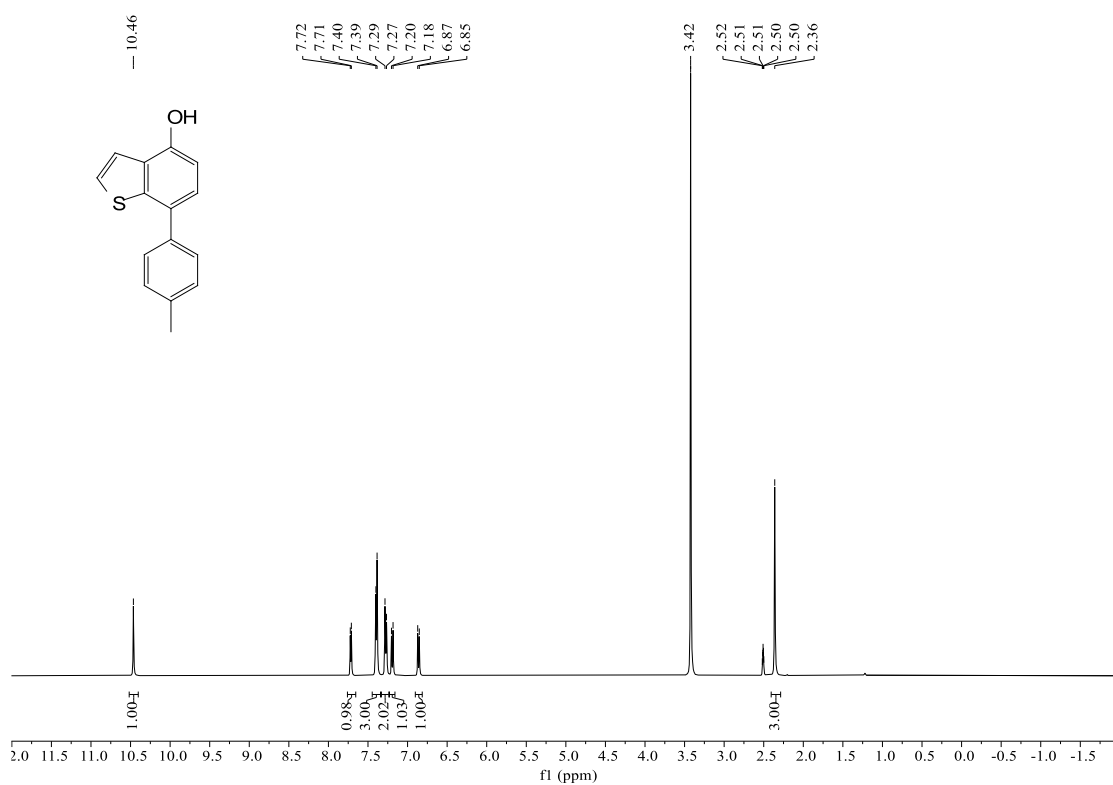

**$^{13}\text{C}$  NMR spectra of 3ag (100 MHz, DMSO- $d_6$ )**

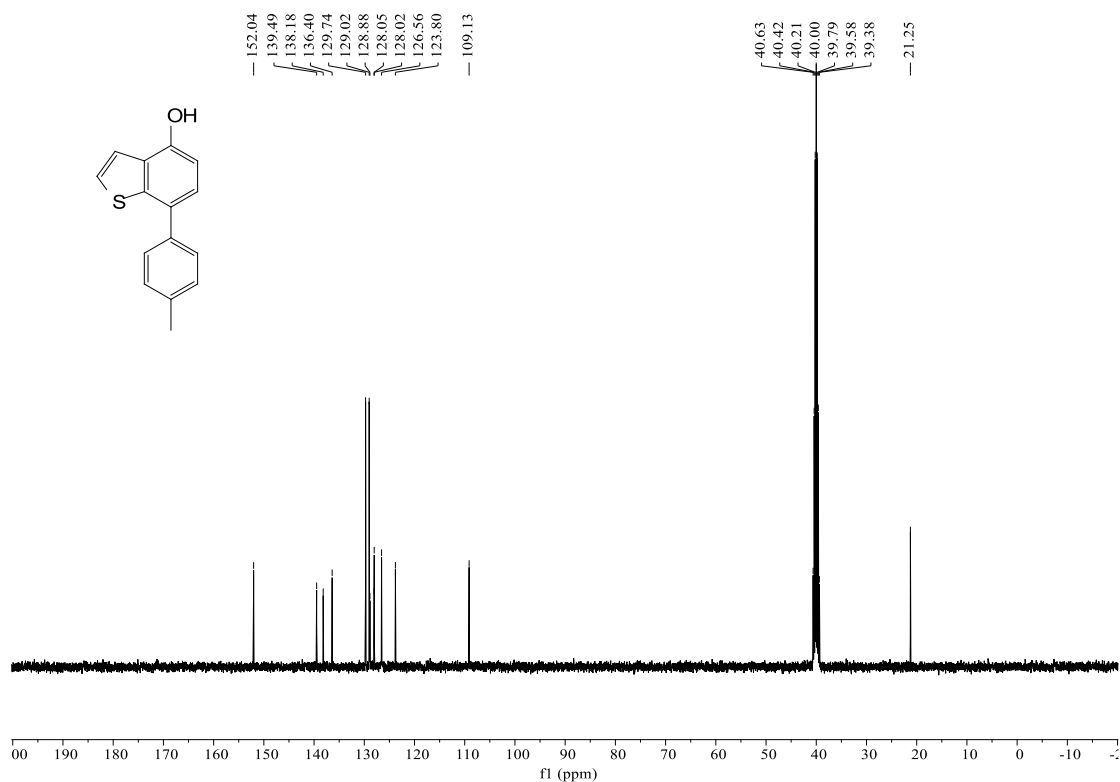

**$^1\text{H}$  NMR spectra of 3ah + 3ah' (400 MHz, DMSO- $d_6$ )**

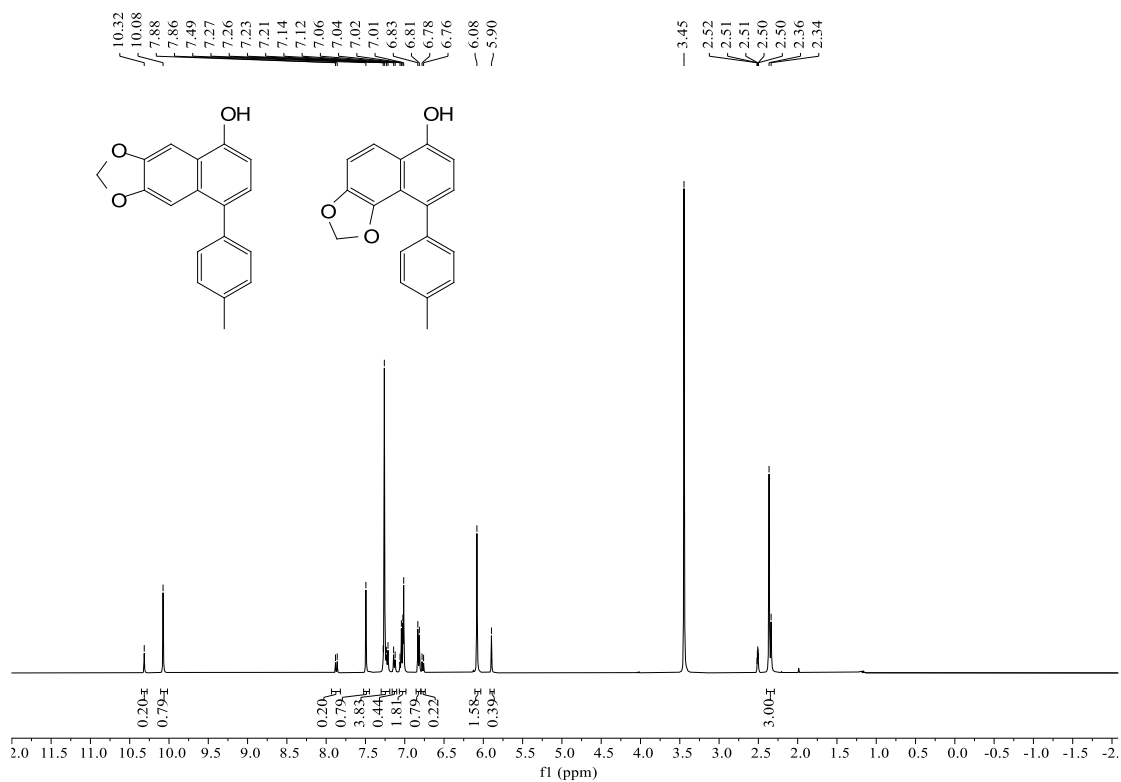

**$^{13}\text{C}$  NMR spectra of 3ah + 3ah' (100 MHz, DMSO- $d_6$ )**

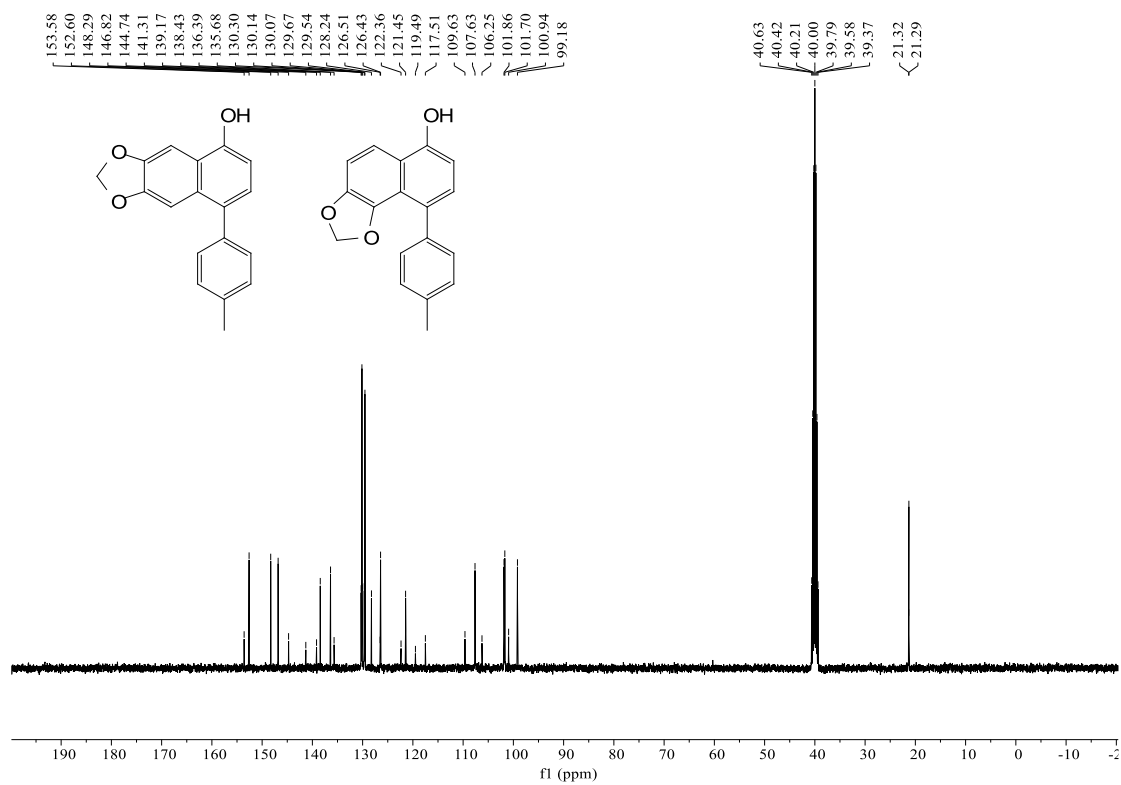

**$^1\text{H}$  NMR spectra of 3ai (400 MHz,  $\text{CDCl}_3$ )**

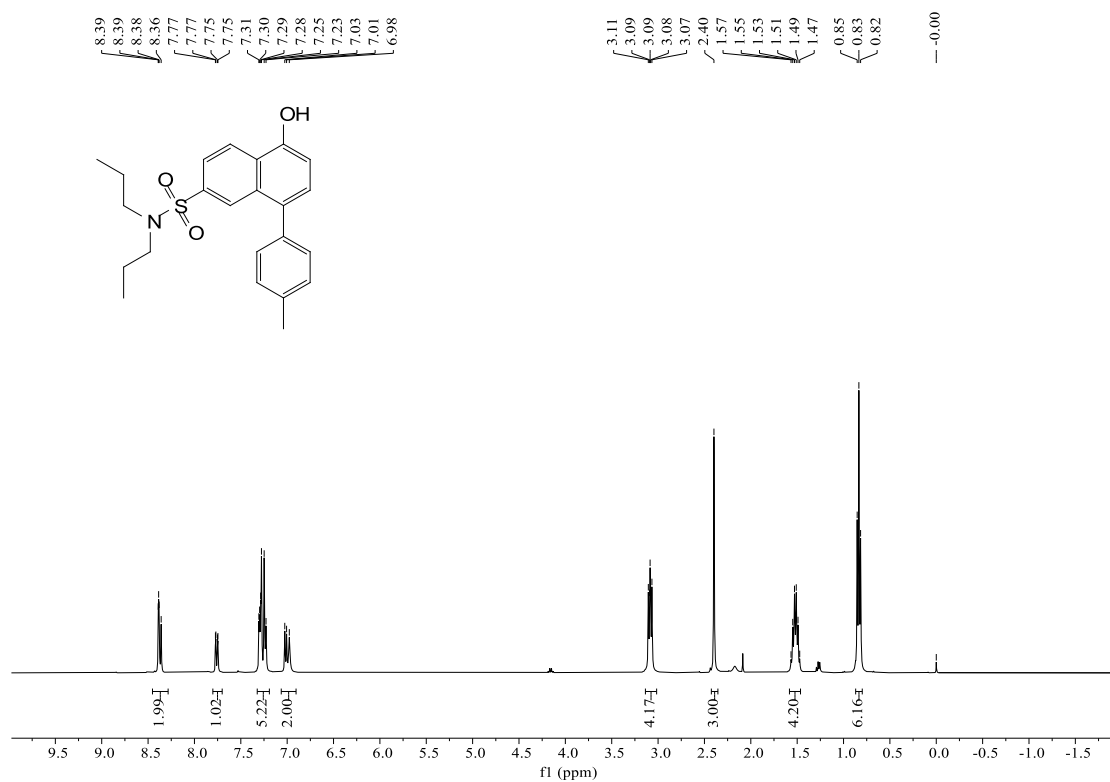

**$^{13}\text{C}$  NMR spectra of 3ai (100 MHz,  $\text{CDCl}_3$ )**

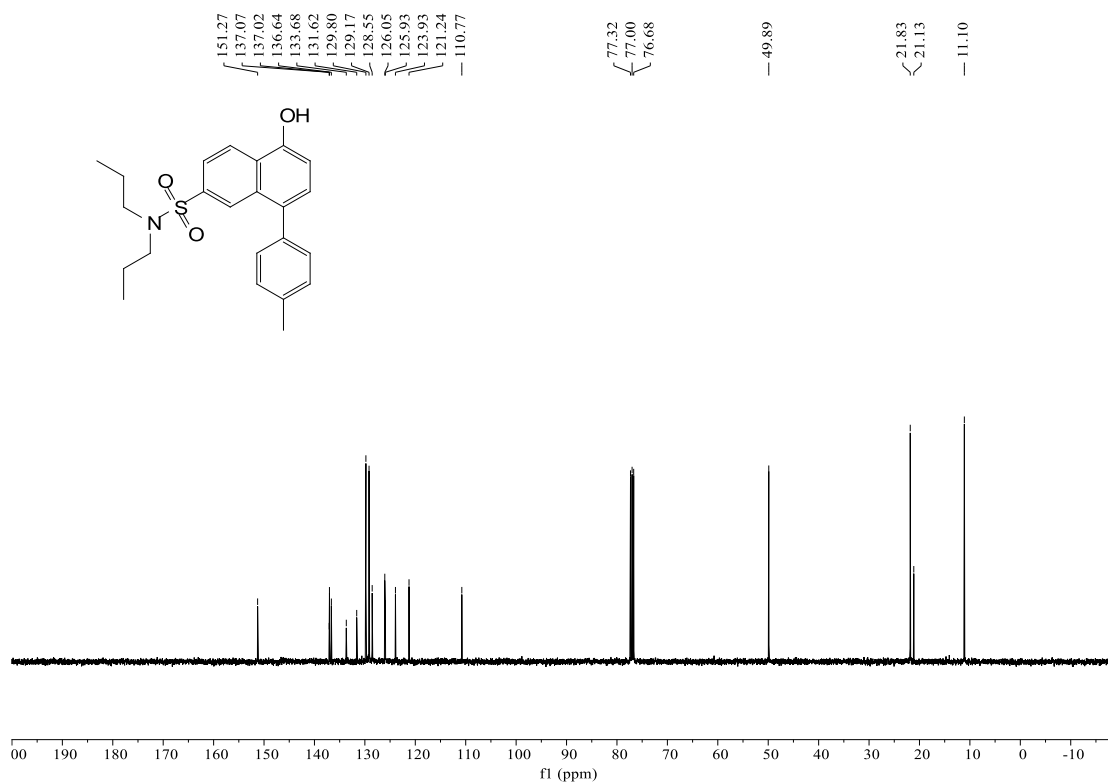

**$^1\text{H}$  NMR spectra of 4a (400 MHz,  $\text{CDCl}_3$ )**

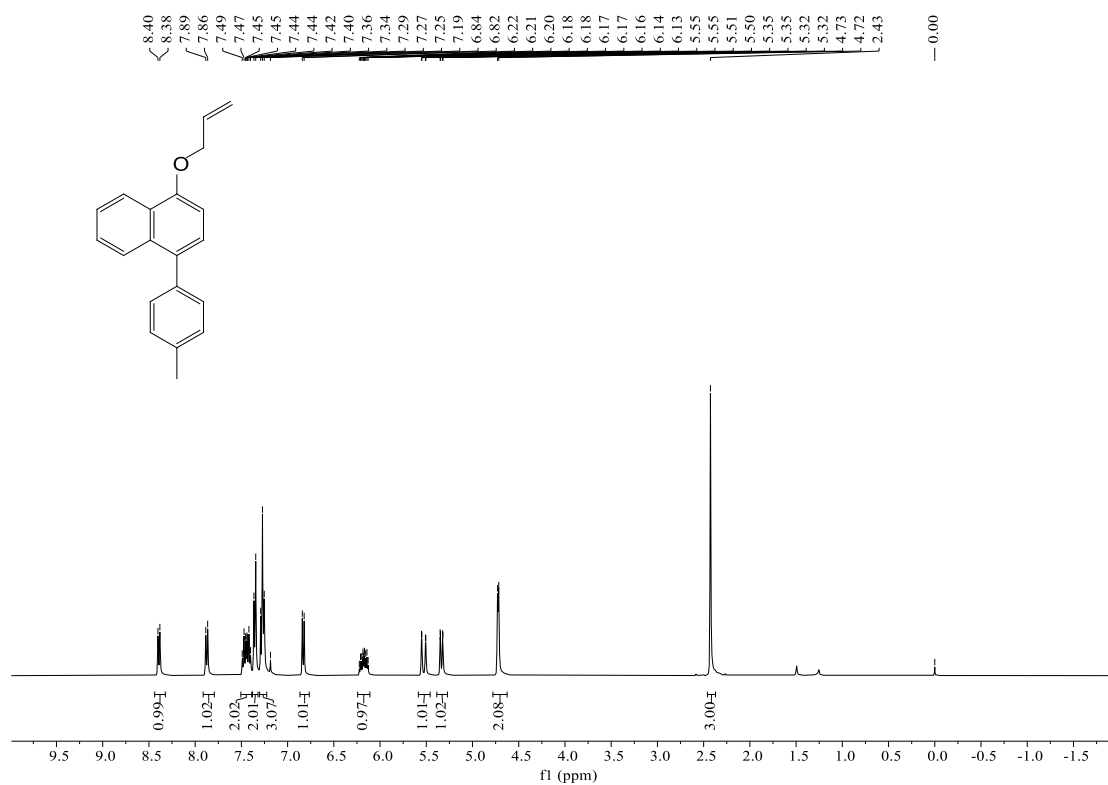

**$^{13}\text{C}$  NMR spectra of 4a (100 MHz,  $\text{CDCl}_3$ )**

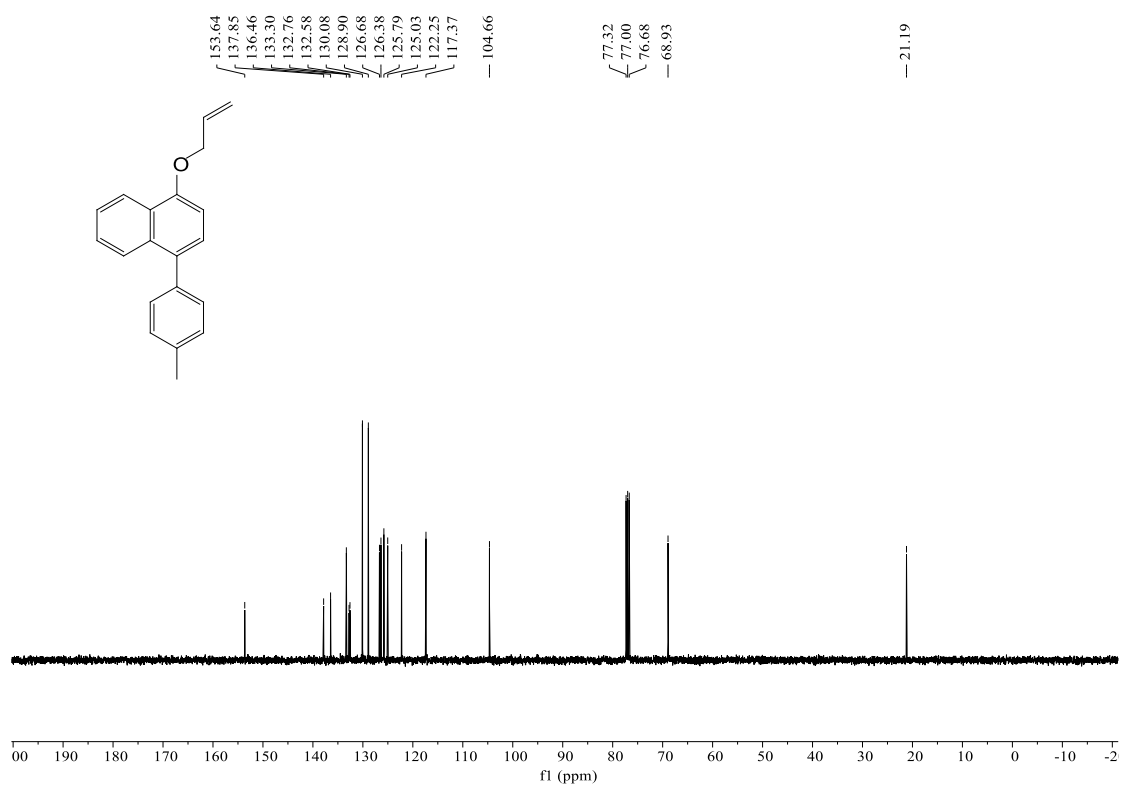

**$^1\text{H}$  NMR spectra of 4b (400 MHz,  $\text{CDCl}_3$ )**

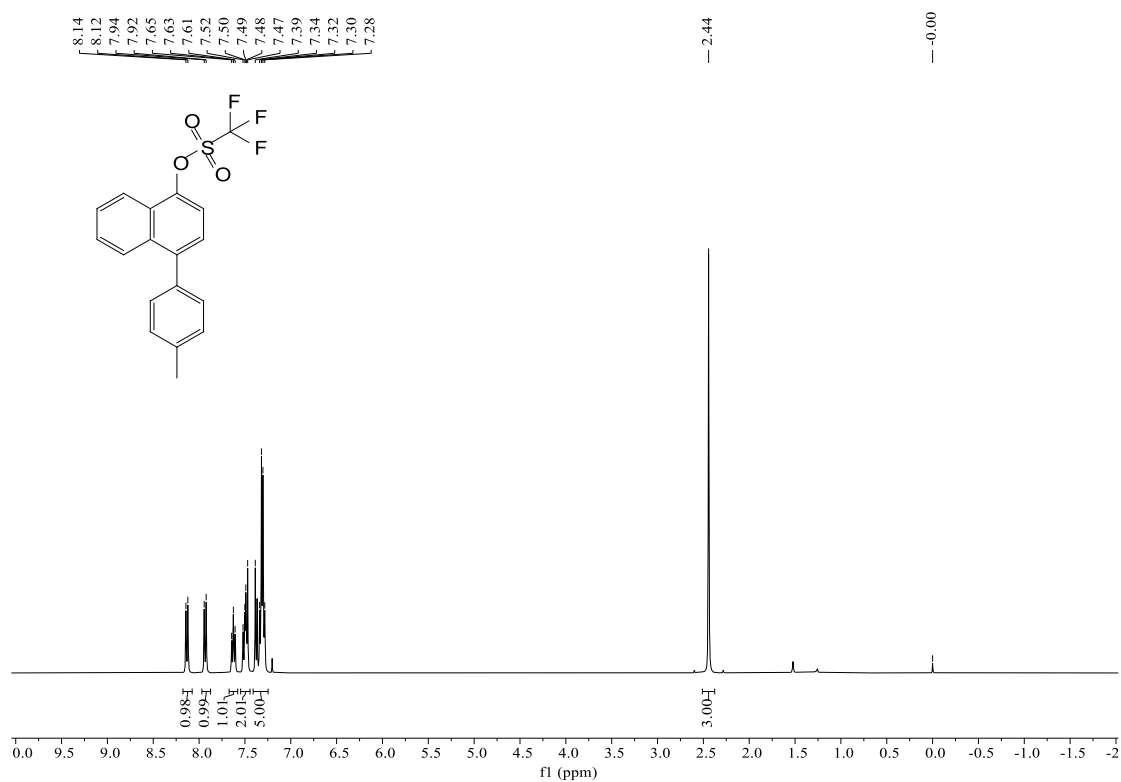



**$^{13}\text{C}$  NMR spectra of 4b (100 MHz,  $\text{CDCl}_3$ )**

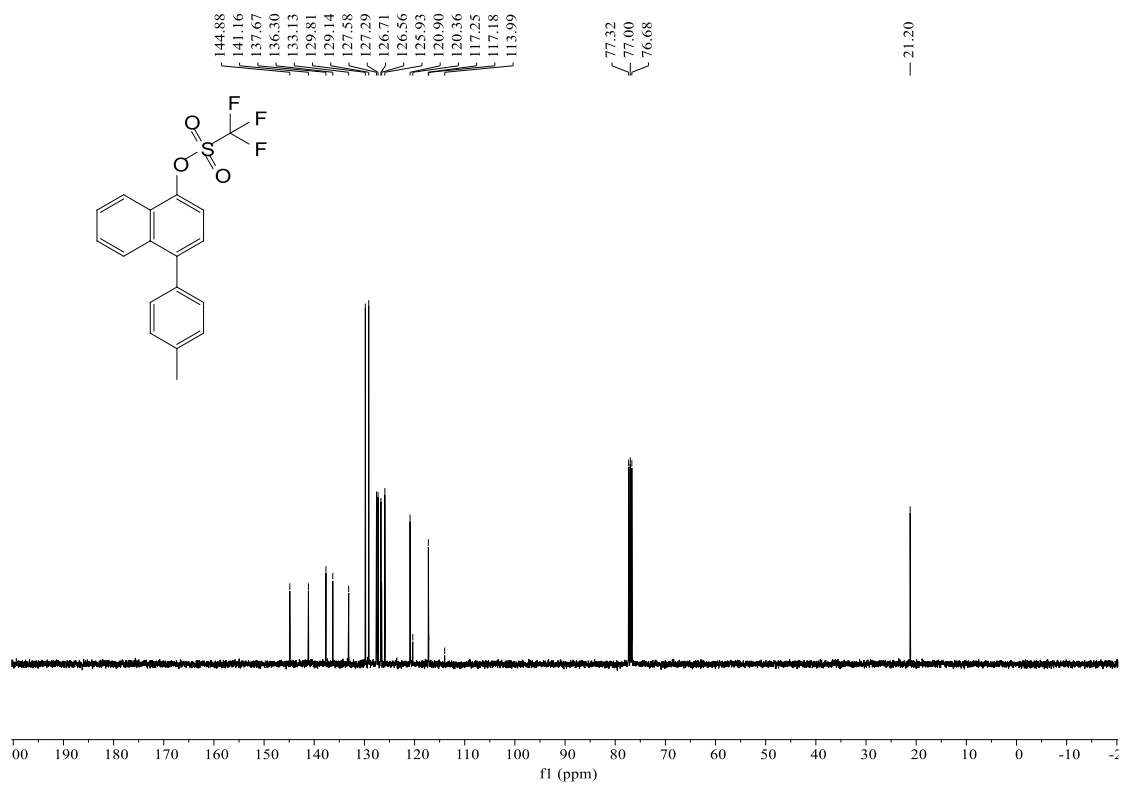

**$^{19}\text{F}$  NMR spectra of 4b (376 MHz,  $\text{CDCl}_3$ )**

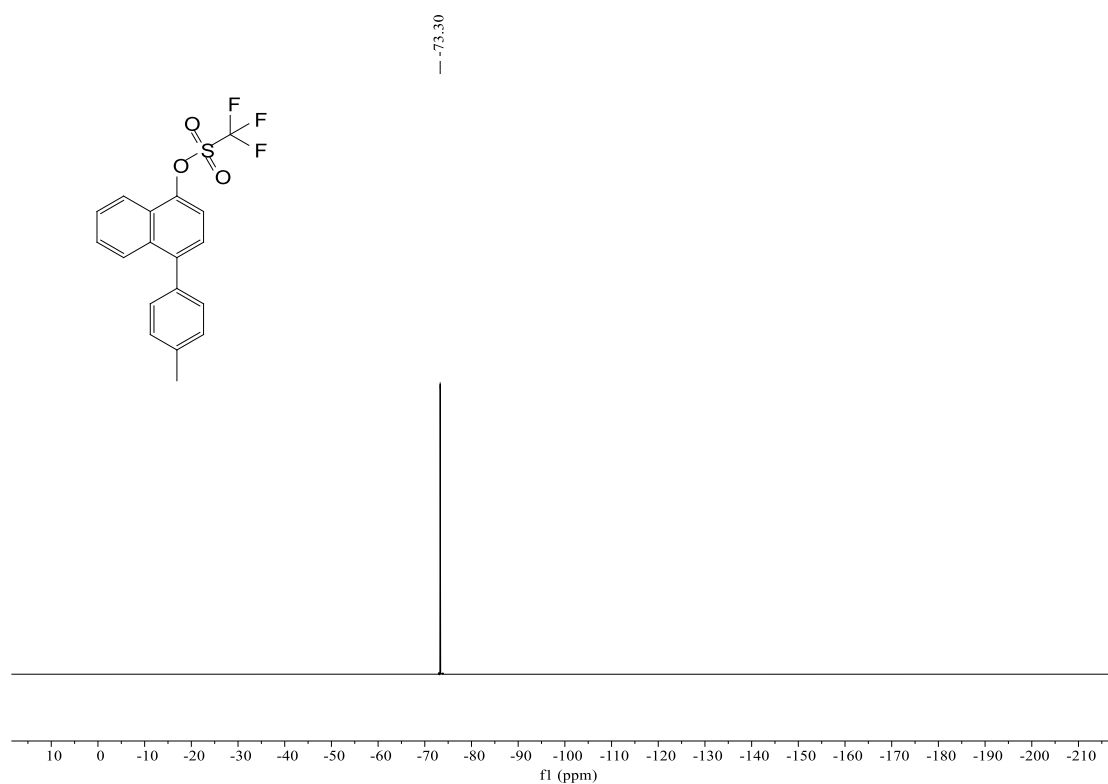

Supplement: d6ob00092d1.pdf [file d6ob00092d1.pdf]
